# Supplementary material for: Design, synthesis, and biological evaluation of substituted oxopyridine derivatives as selective FXIa inhibitors
Source: Royal Society of Chemistry journal article supplement (doi:10.1039/d4md01013b), 2025-01-01
Supplement: d4md01013b1.pdf [file d4md01013b1.pdf]

# Supporting Information

## Design, synthesis, and biological evaluation of substituted oxopyridine derivatives as selective FXIa inhibitors

Yanshi Wang <sup>a, b</sup>, Sida Yan <sup>a, b</sup>, Jianglin Yuan <sup>a, b</sup>, Xiaoyan Meng <sup>a, b</sup>, Peng Liu <sup>a, b</sup>, Shijun Zhang <sup>a, b</sup>, Fancui Meng <sup>a, b</sup>,  
Wei Liu <sup>a, b</sup>, Shuhao Zhang <sup>a, b</sup>, Changjiang Huang <sup>a, b, \*</sup> and Qunchao Wei <sup>a, b, \*</sup>

<sup>a</sup> State Key Laboratory of Druggability Evaluation and Systematic Translational Medicine, Puchuang Pharmaceutical Technology (Tianjin) Co., Ltd., Tianjin Institute of Pharmaceutical Research, 306 Huiren Road, Tianjin 300301, P. R. China

<sup>b</sup> Tianjin Key Laboratory of Molecular Design and Drug Discovery, Puchuang Pharmaceutical Technology (Tianjin) Co., Ltd., Tianjin Institute of Pharmaceutical Research, 306 Huiren Road, Tianjin 300301, P. R. China

### Table of Contents

|                                                                                                    |     |
|----------------------------------------------------------------------------------------------------|-----|
| 1. <sup>1</sup> H-NMR and <sup>13</sup> C-NMR spectra for intermediates and tested compounds ..... | S2  |
| 2. Purity data of tested compounds.....                                                            | S30 |

## $^1\text{H}$ -NMR and $^{13}\text{C}$ -NMR spectra for intermediates and tested compounds

### $^1\text{H}$ -NMR spectrum of intermediate 7

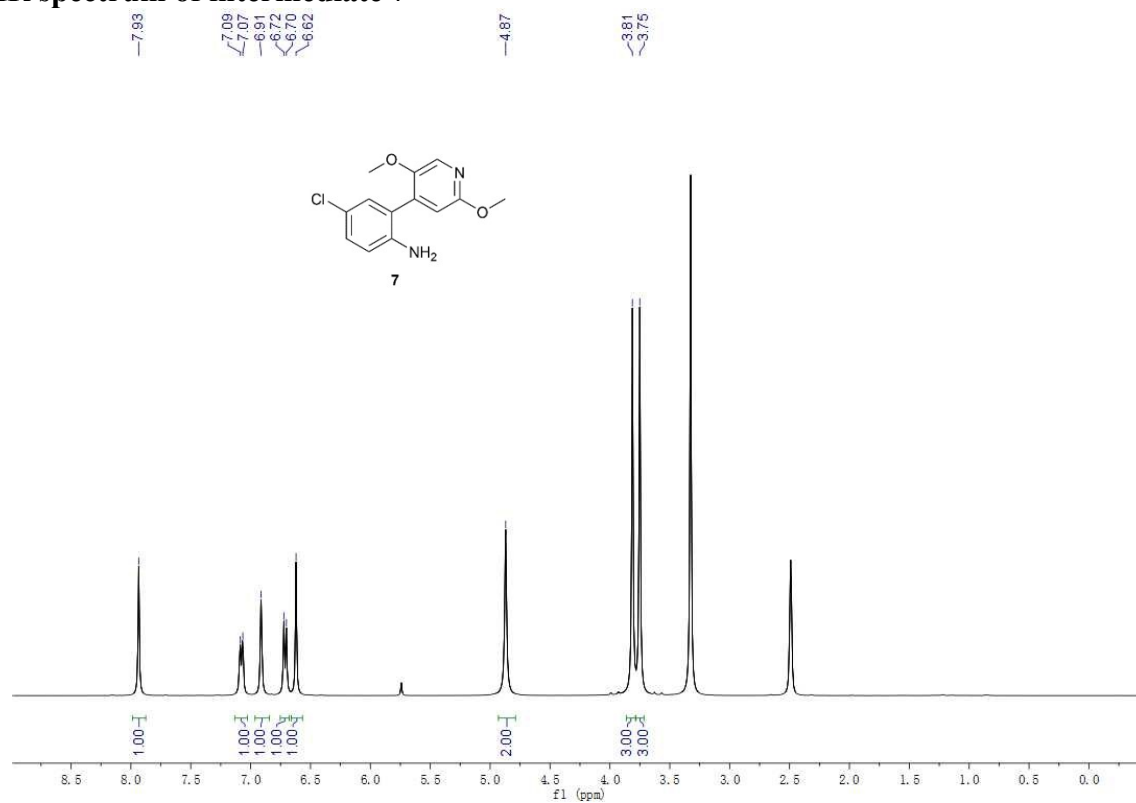

### $^1\text{H}$ -NMR spectrum of intermediate 8

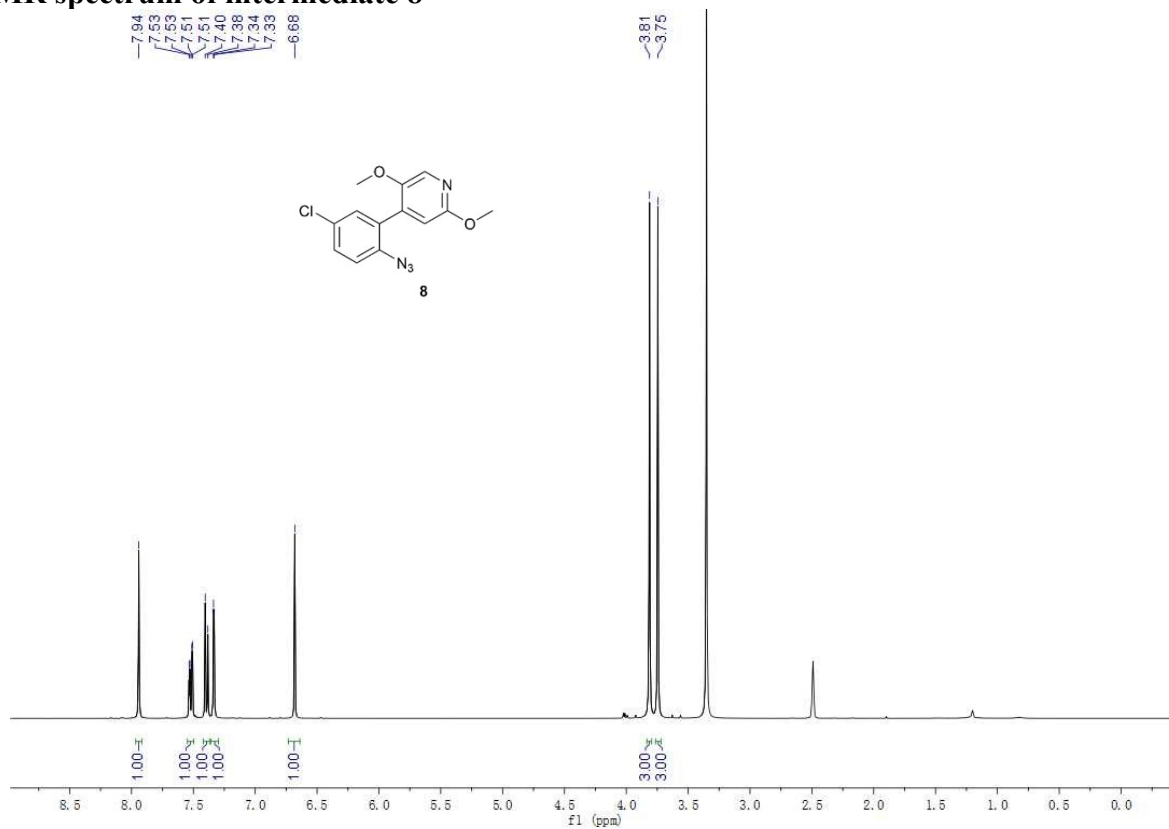

# <sup>1</sup>H-NMR spectrum of intermediate 15

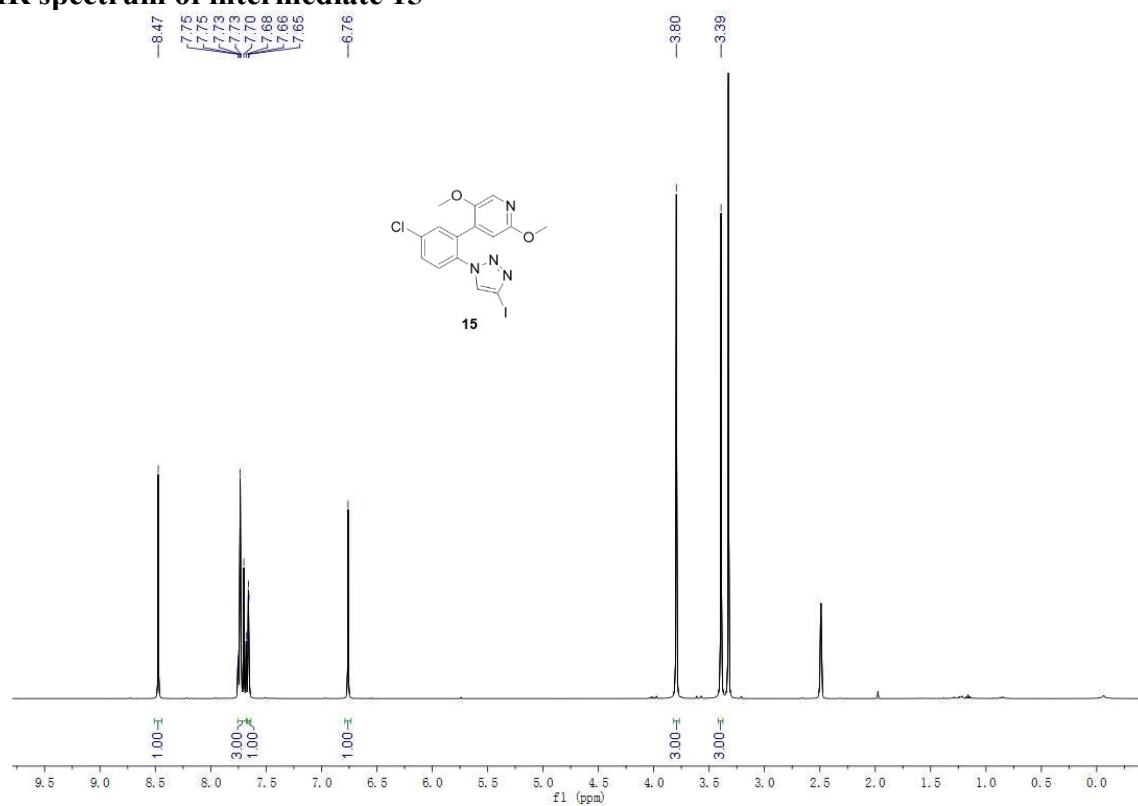

# <sup>1</sup>H-NMR spectrum of intermediate 17

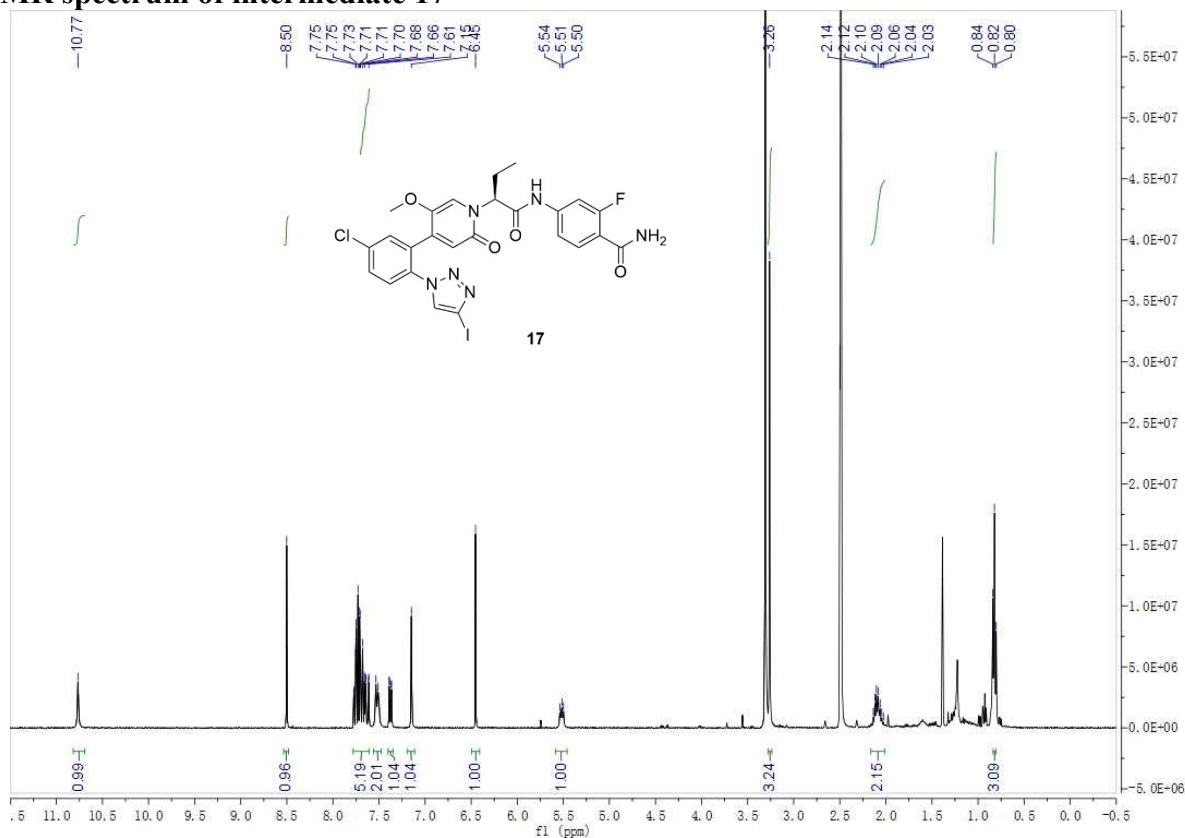

# NMR spectrum of 4a

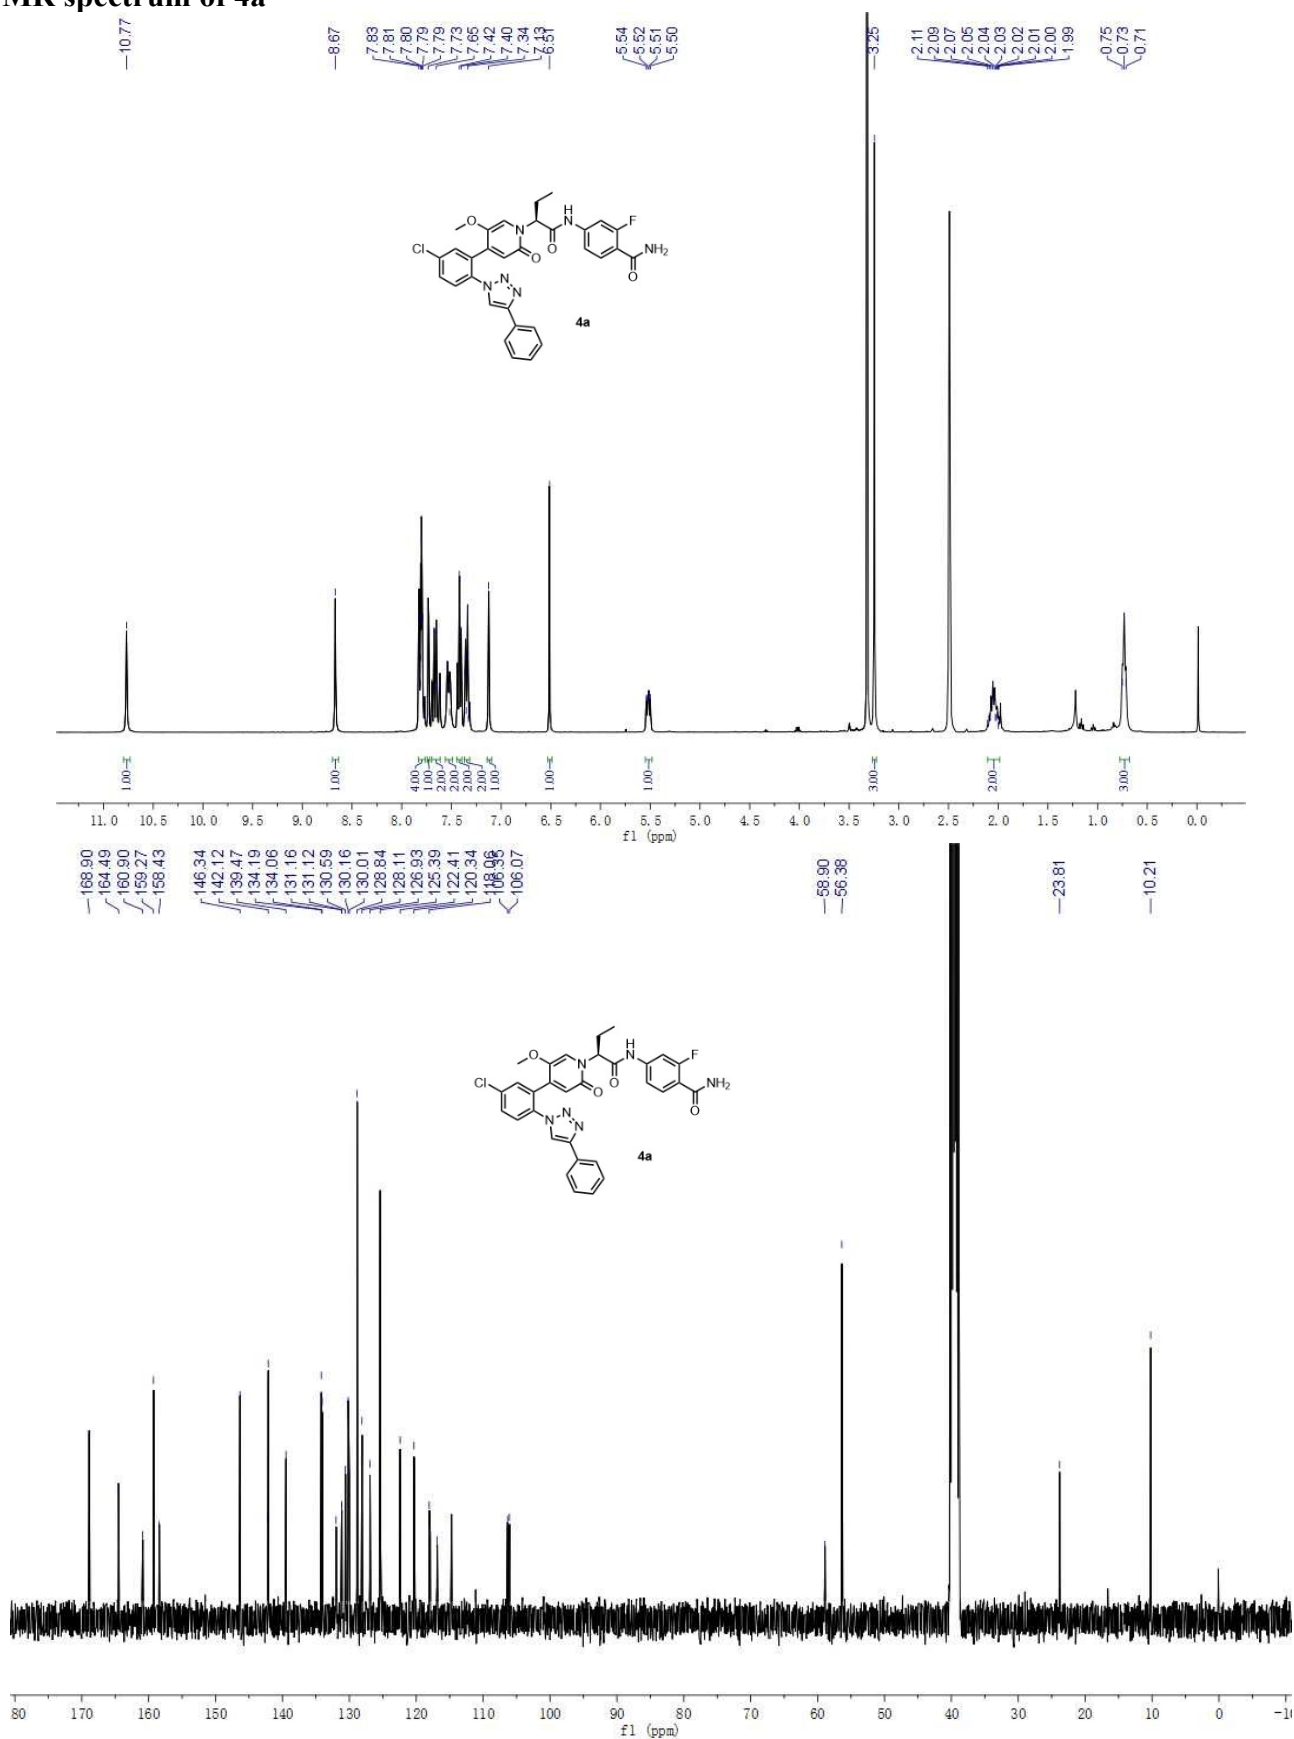

# NMR spectrum of 4b

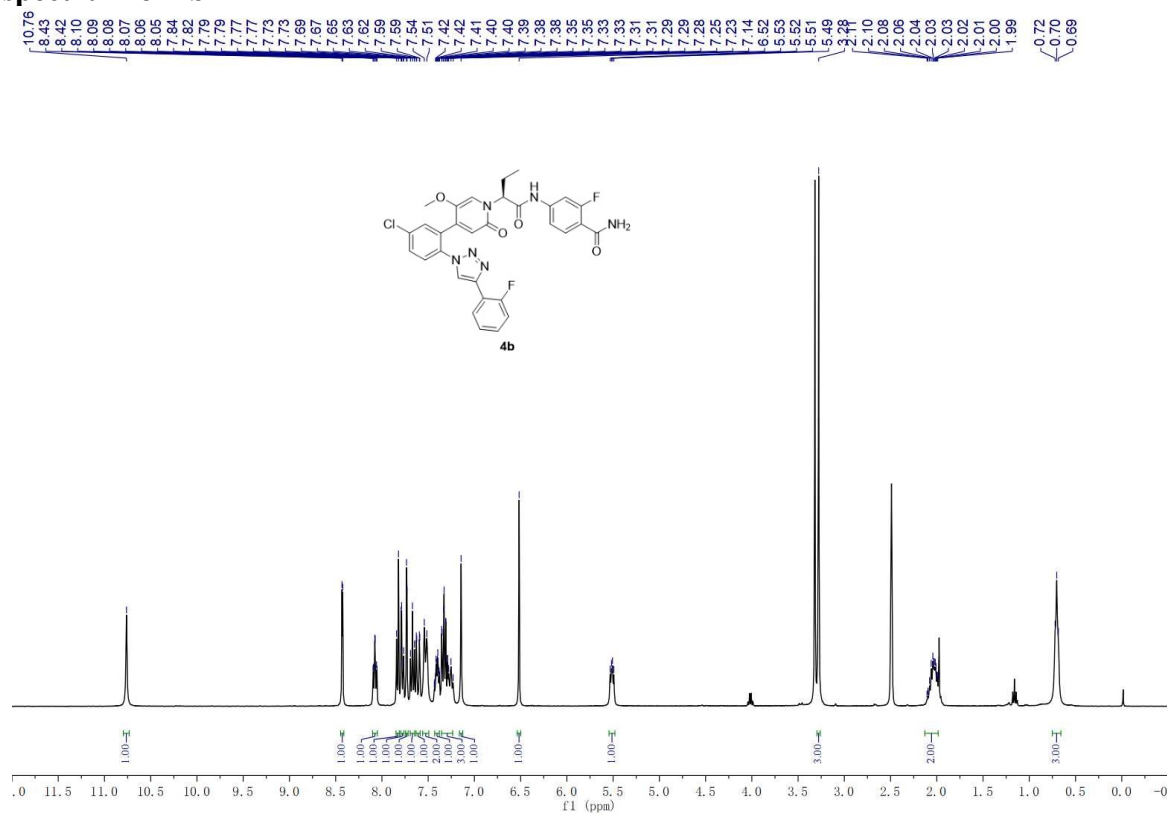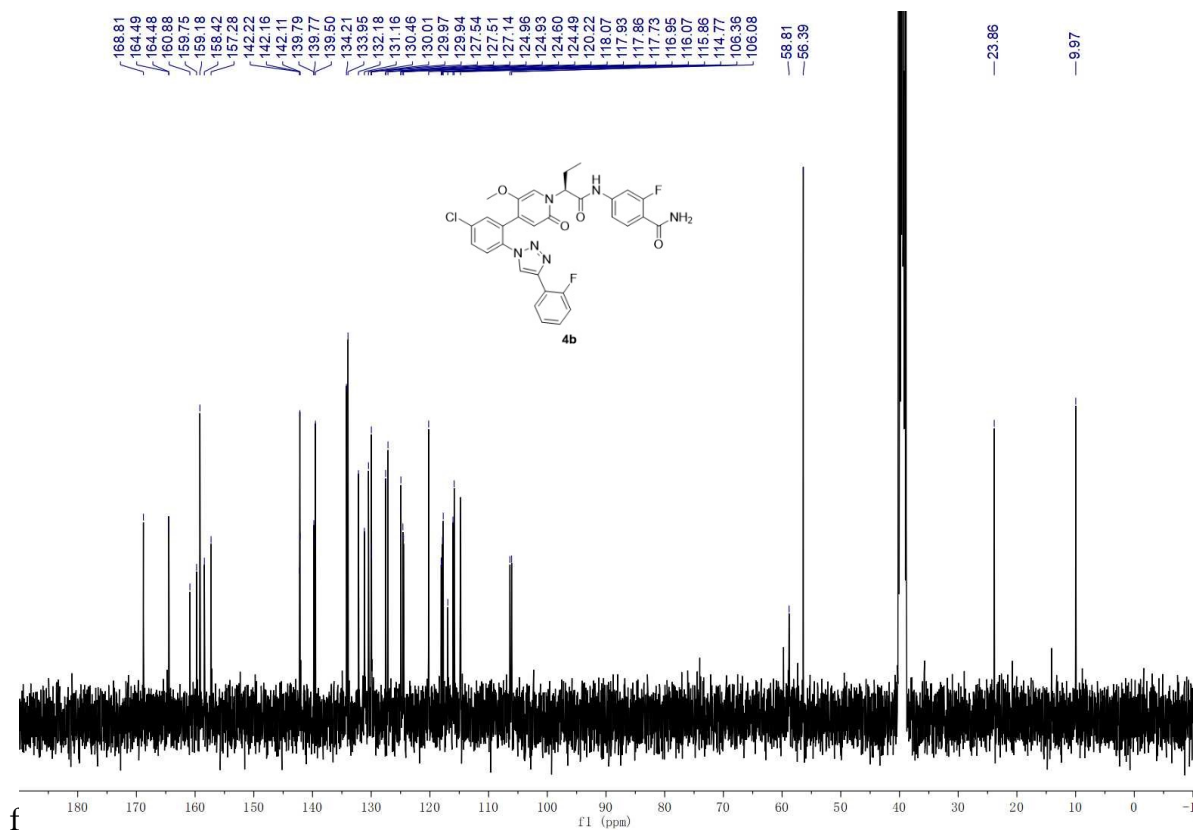

# <sup>1</sup>H-NMR spectrum of 4c

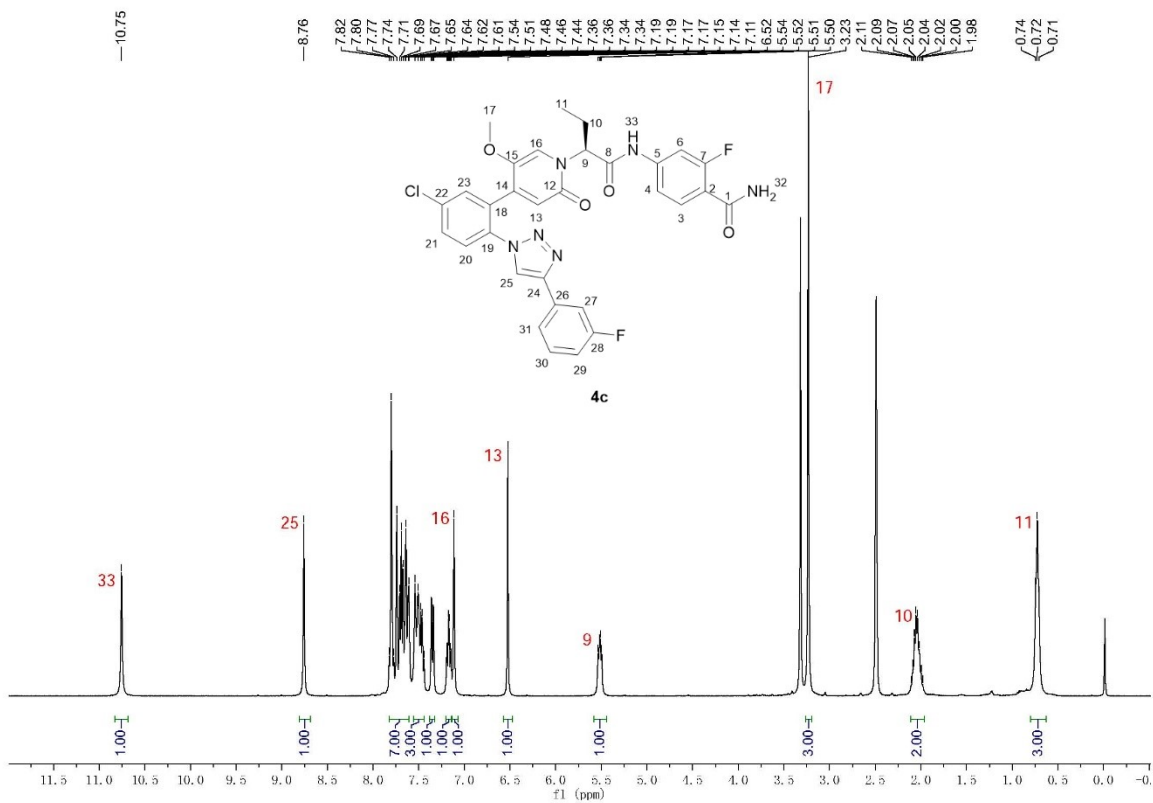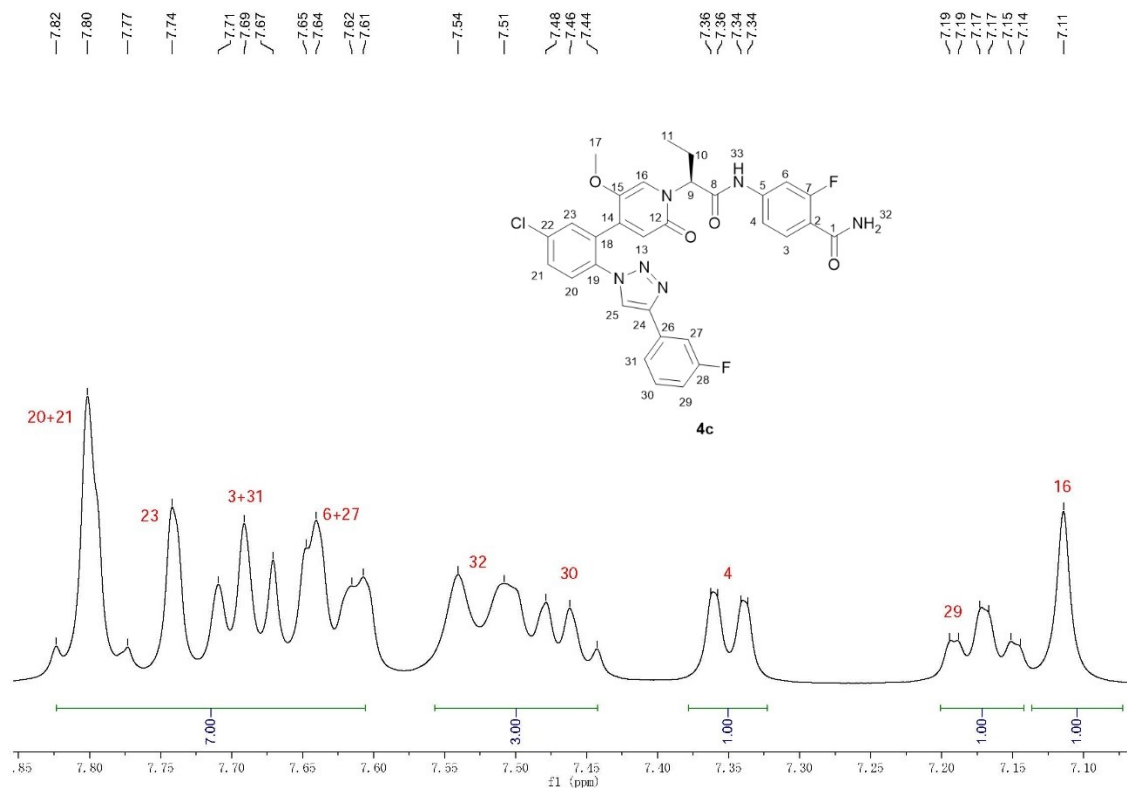

**$^{13}\text{C}$ -NMR spectrum of 4c**

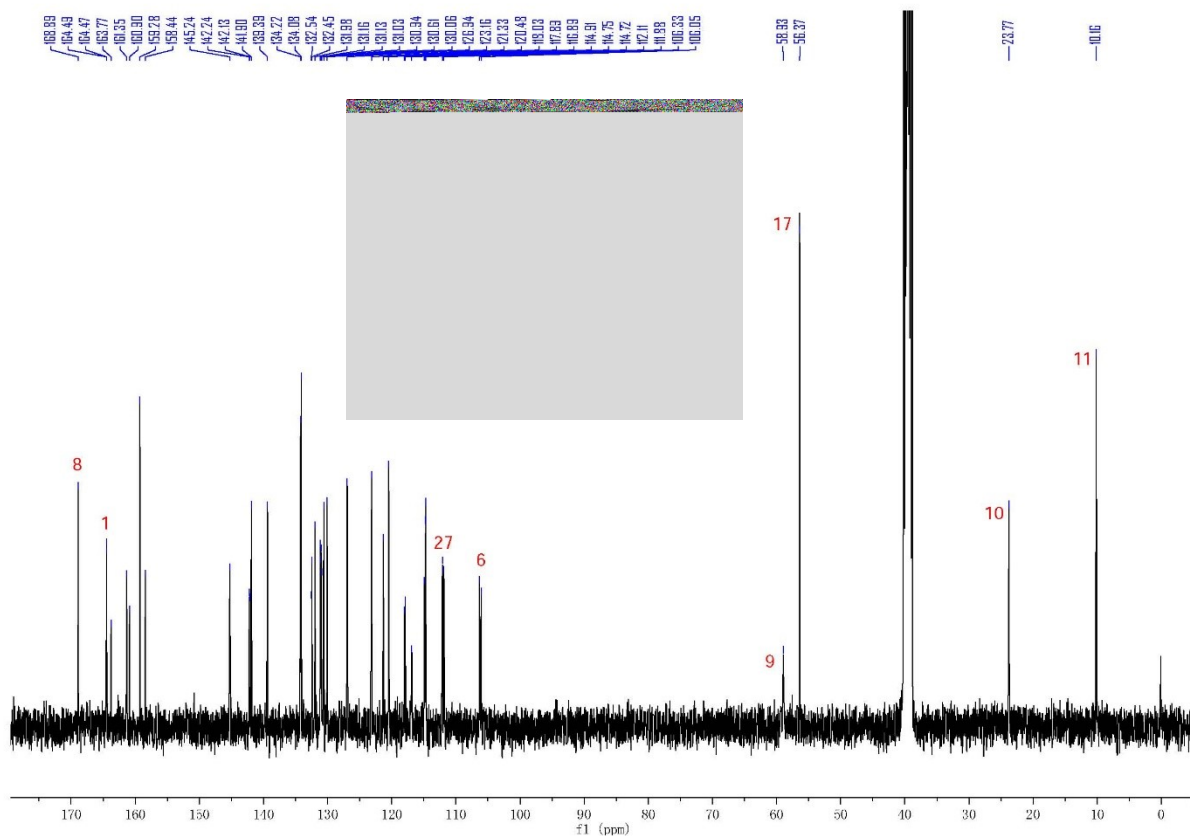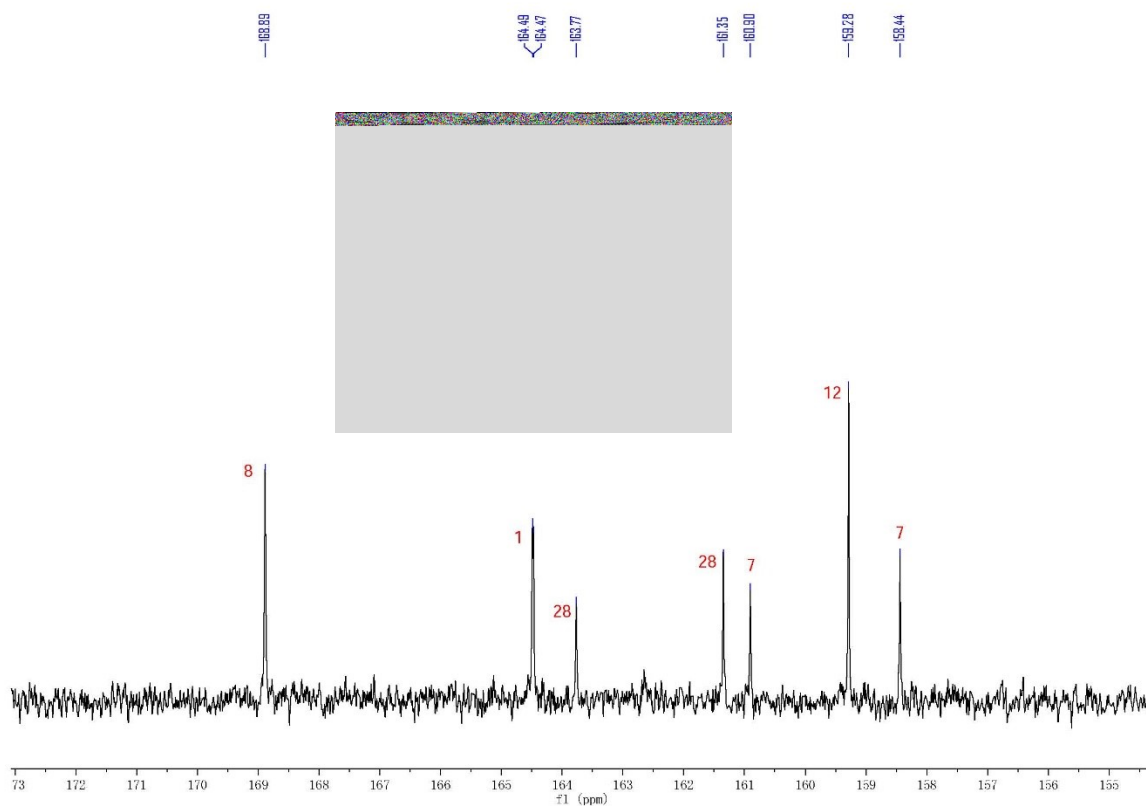

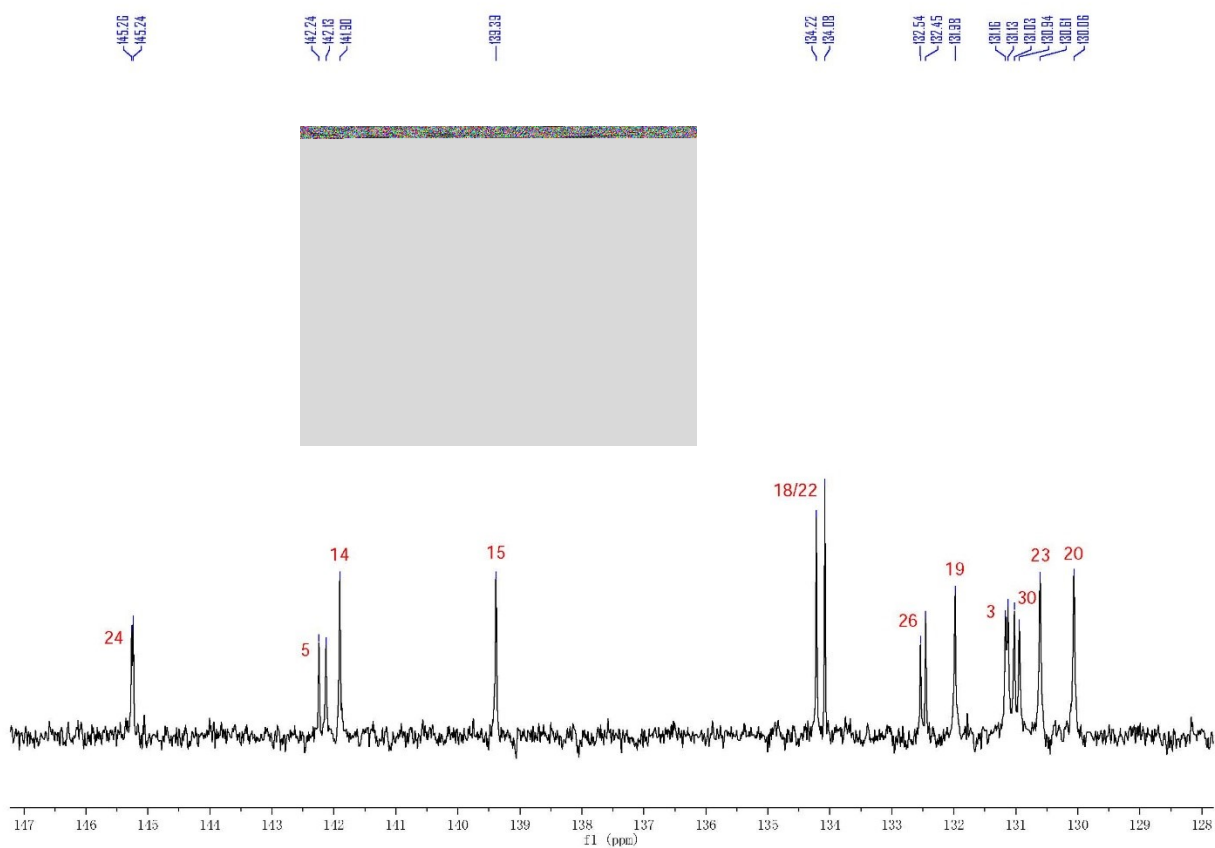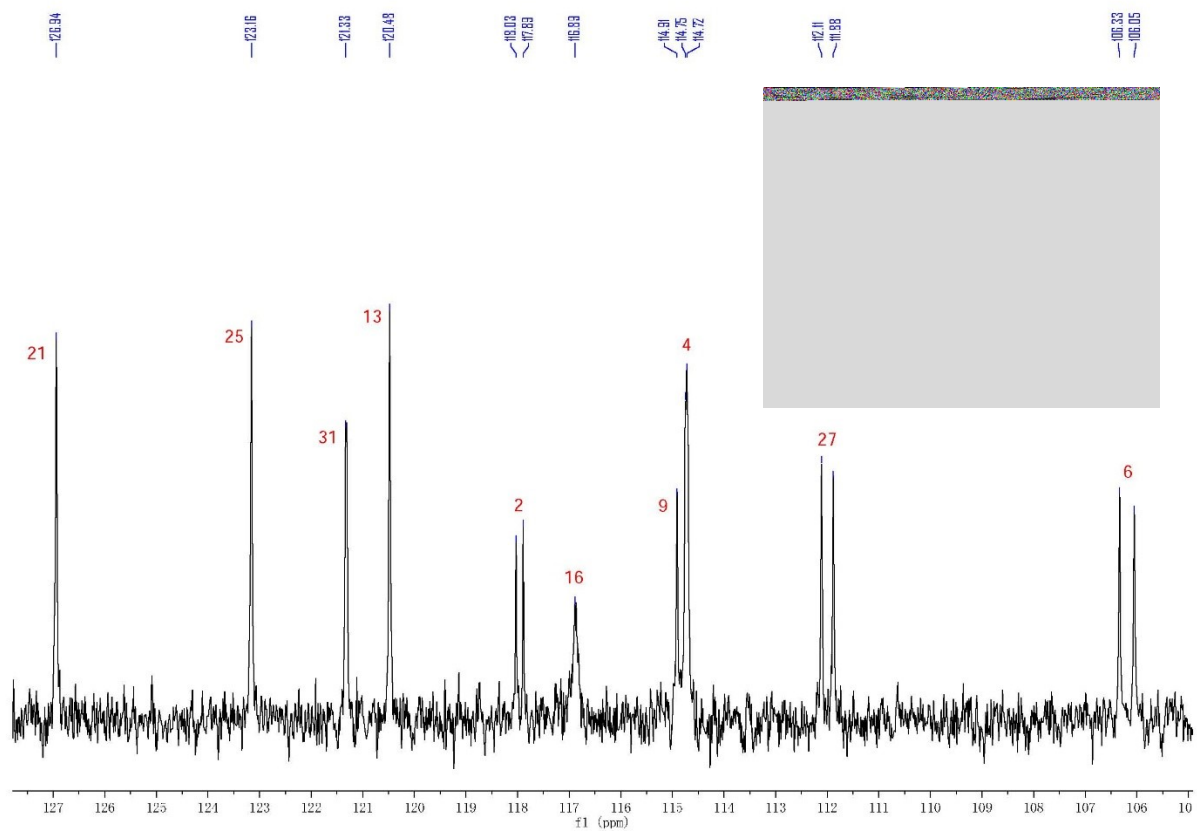



### HMBC of 4c

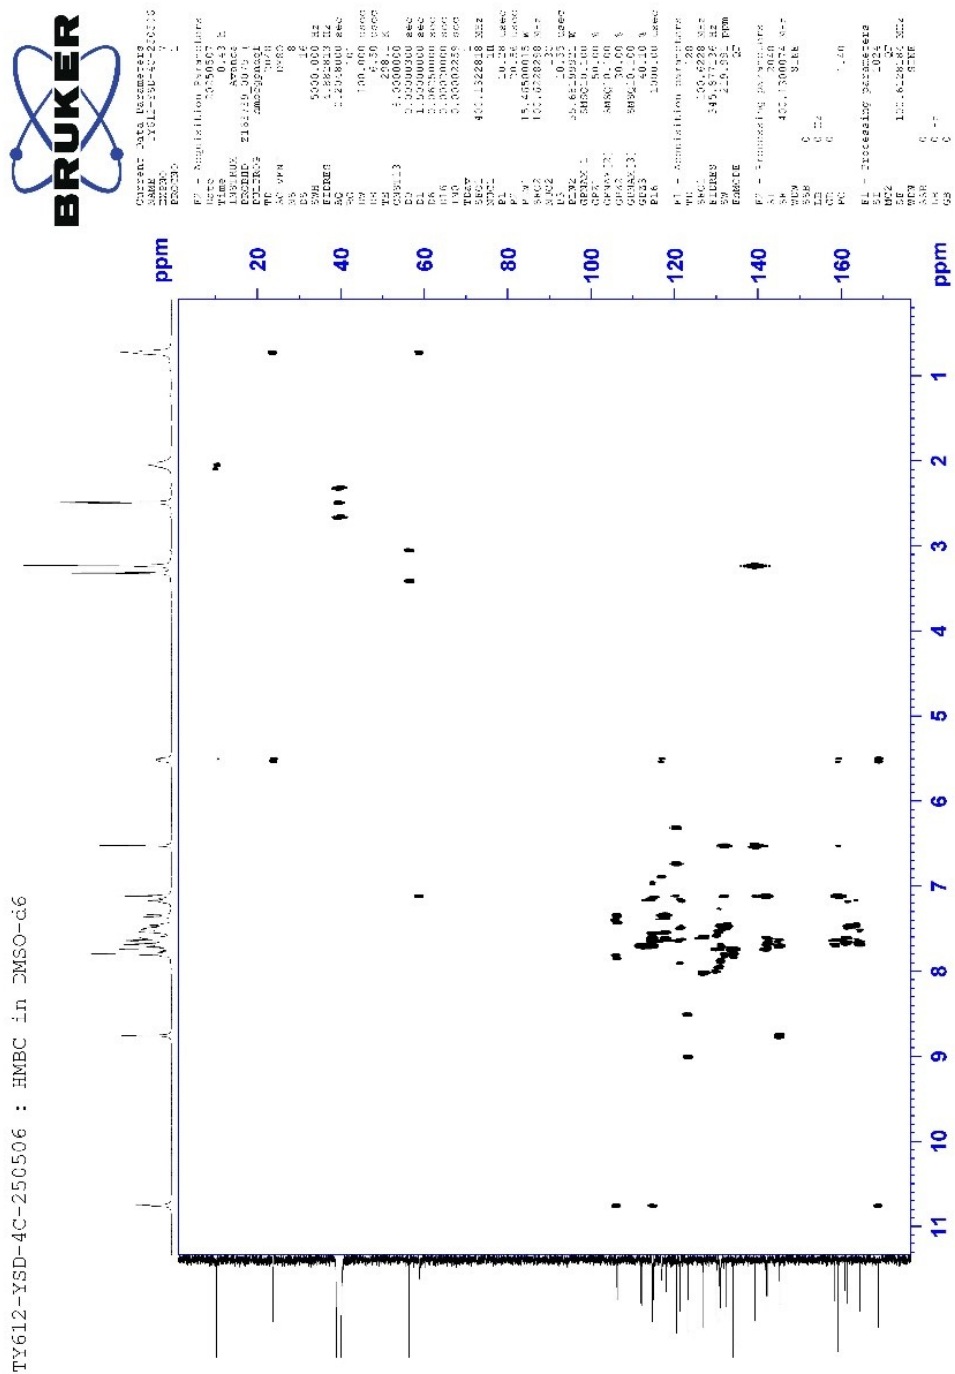

### HSQC of 4c

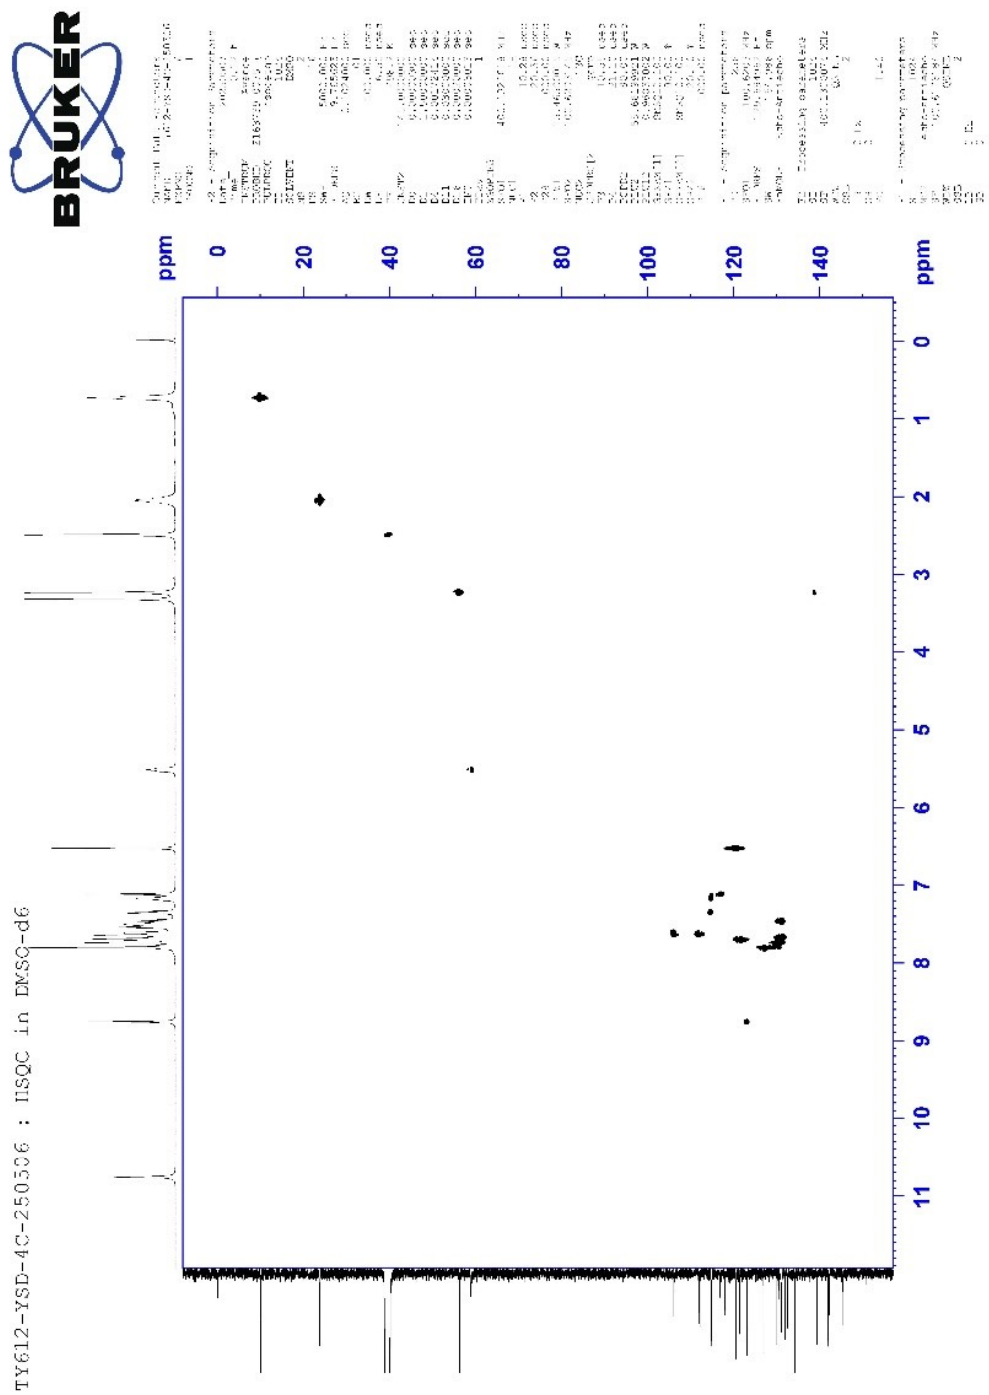

# H-H COSY of 4c

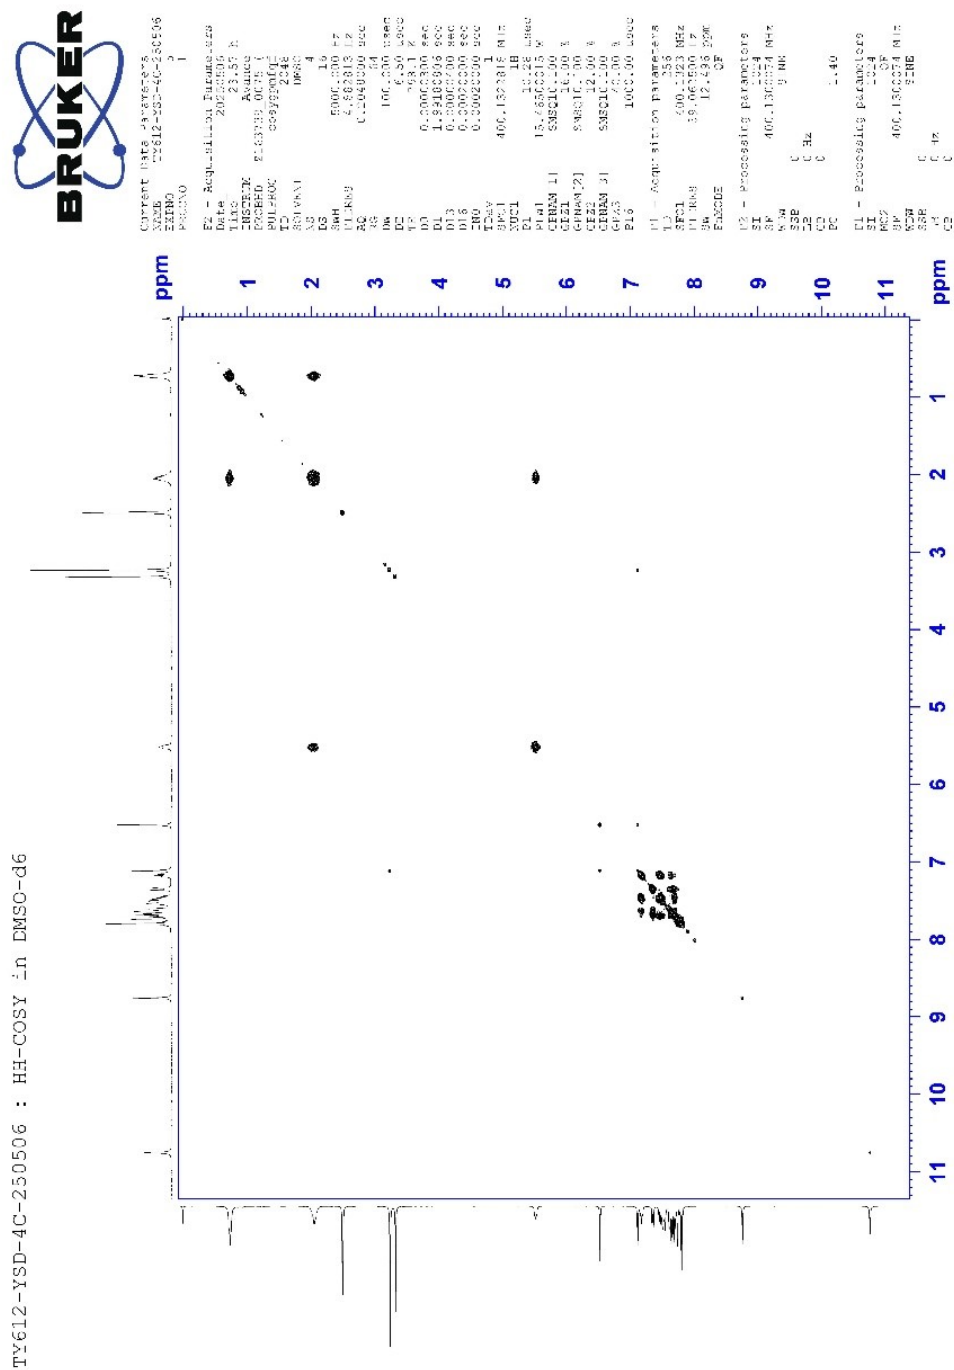

### NOESY of 4c

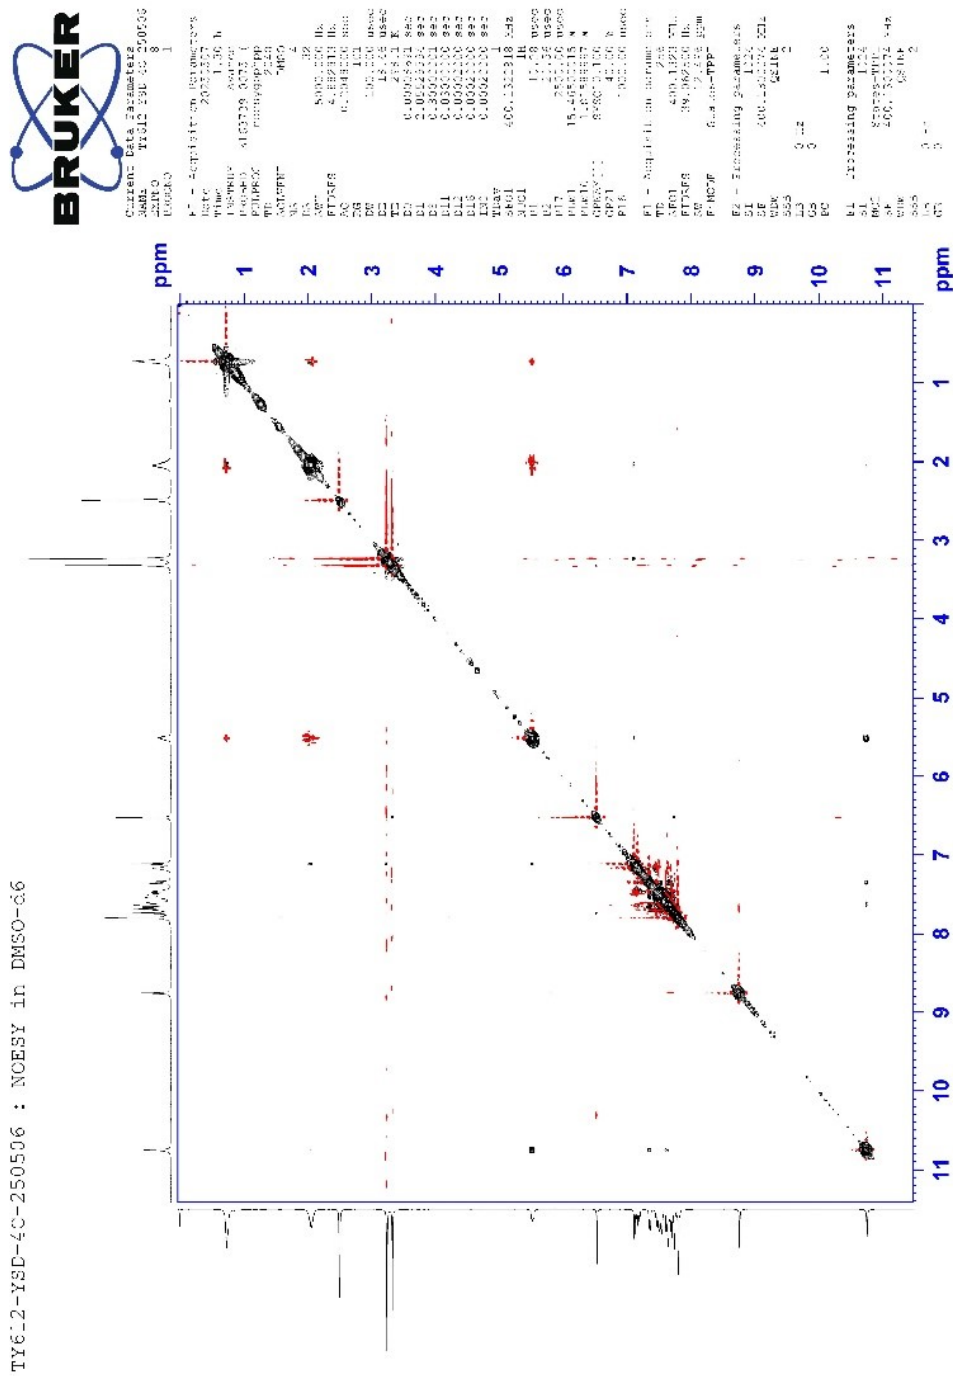

# NMR spectrum of 4d

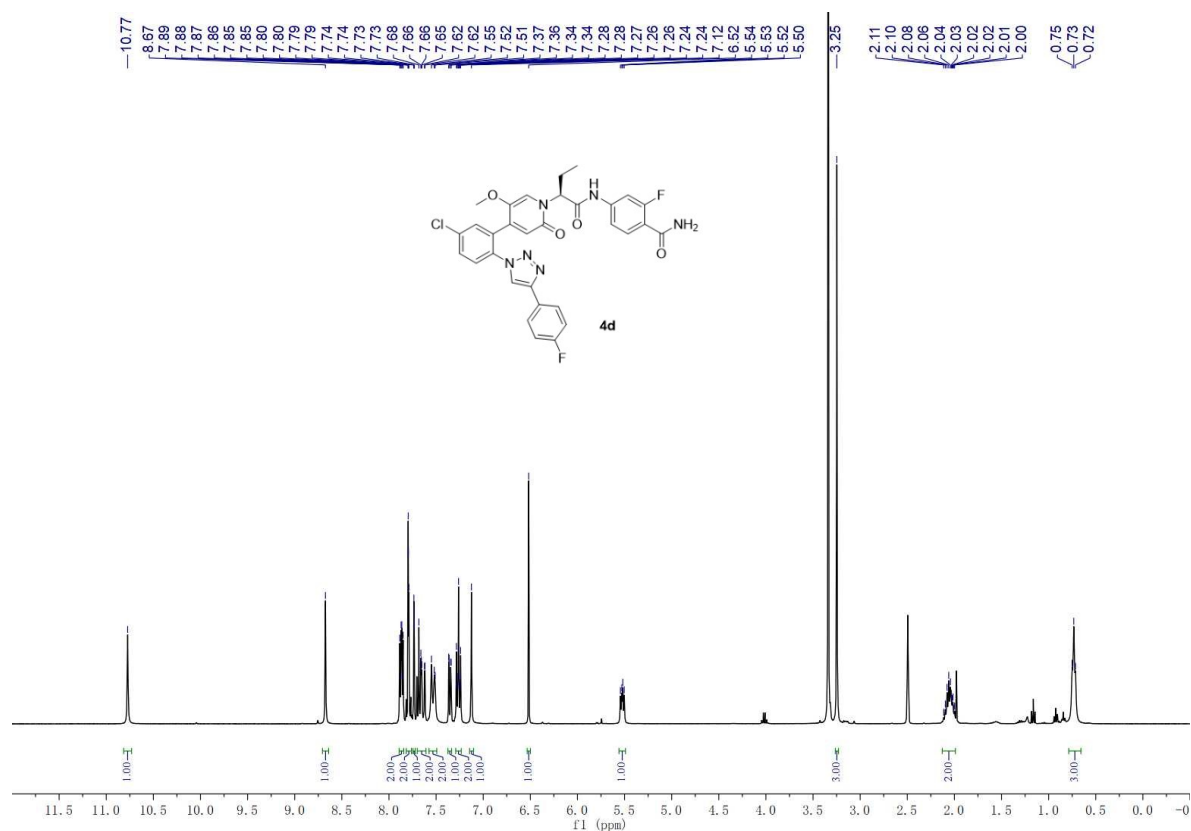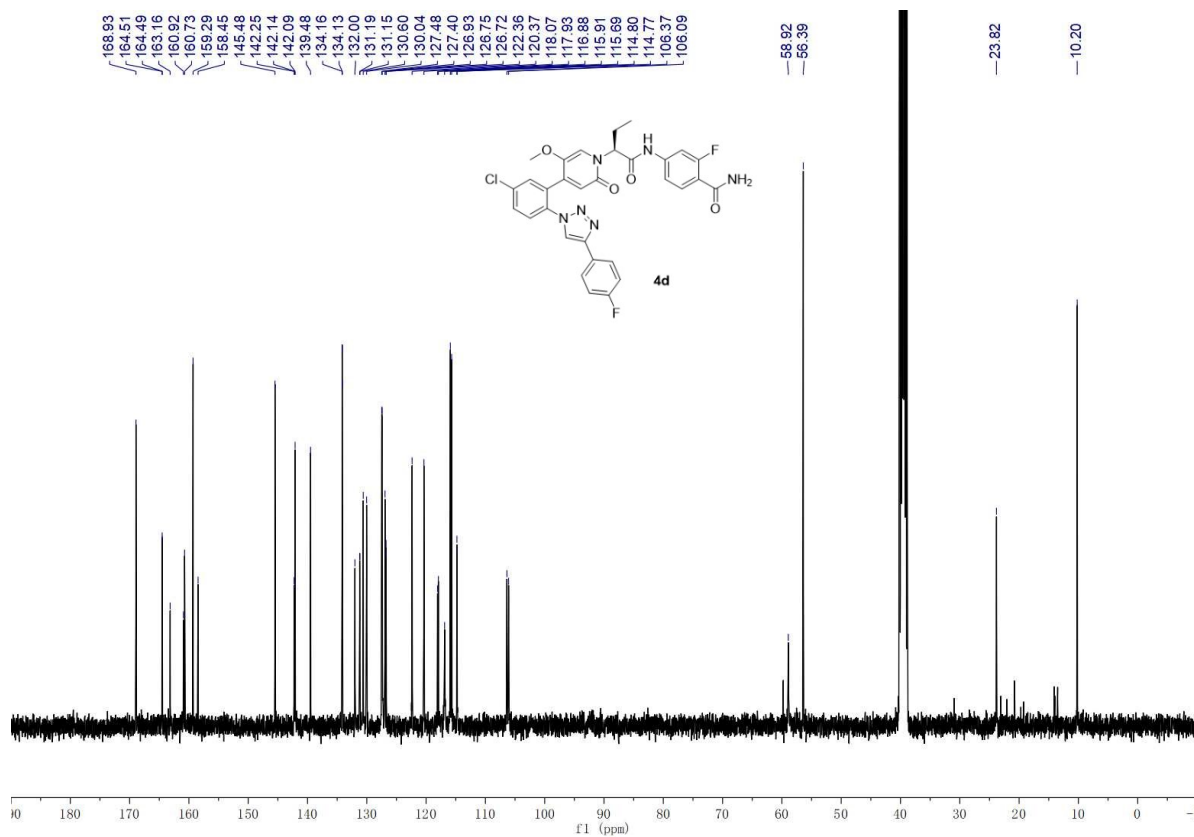

# NMR spectrum of 4e

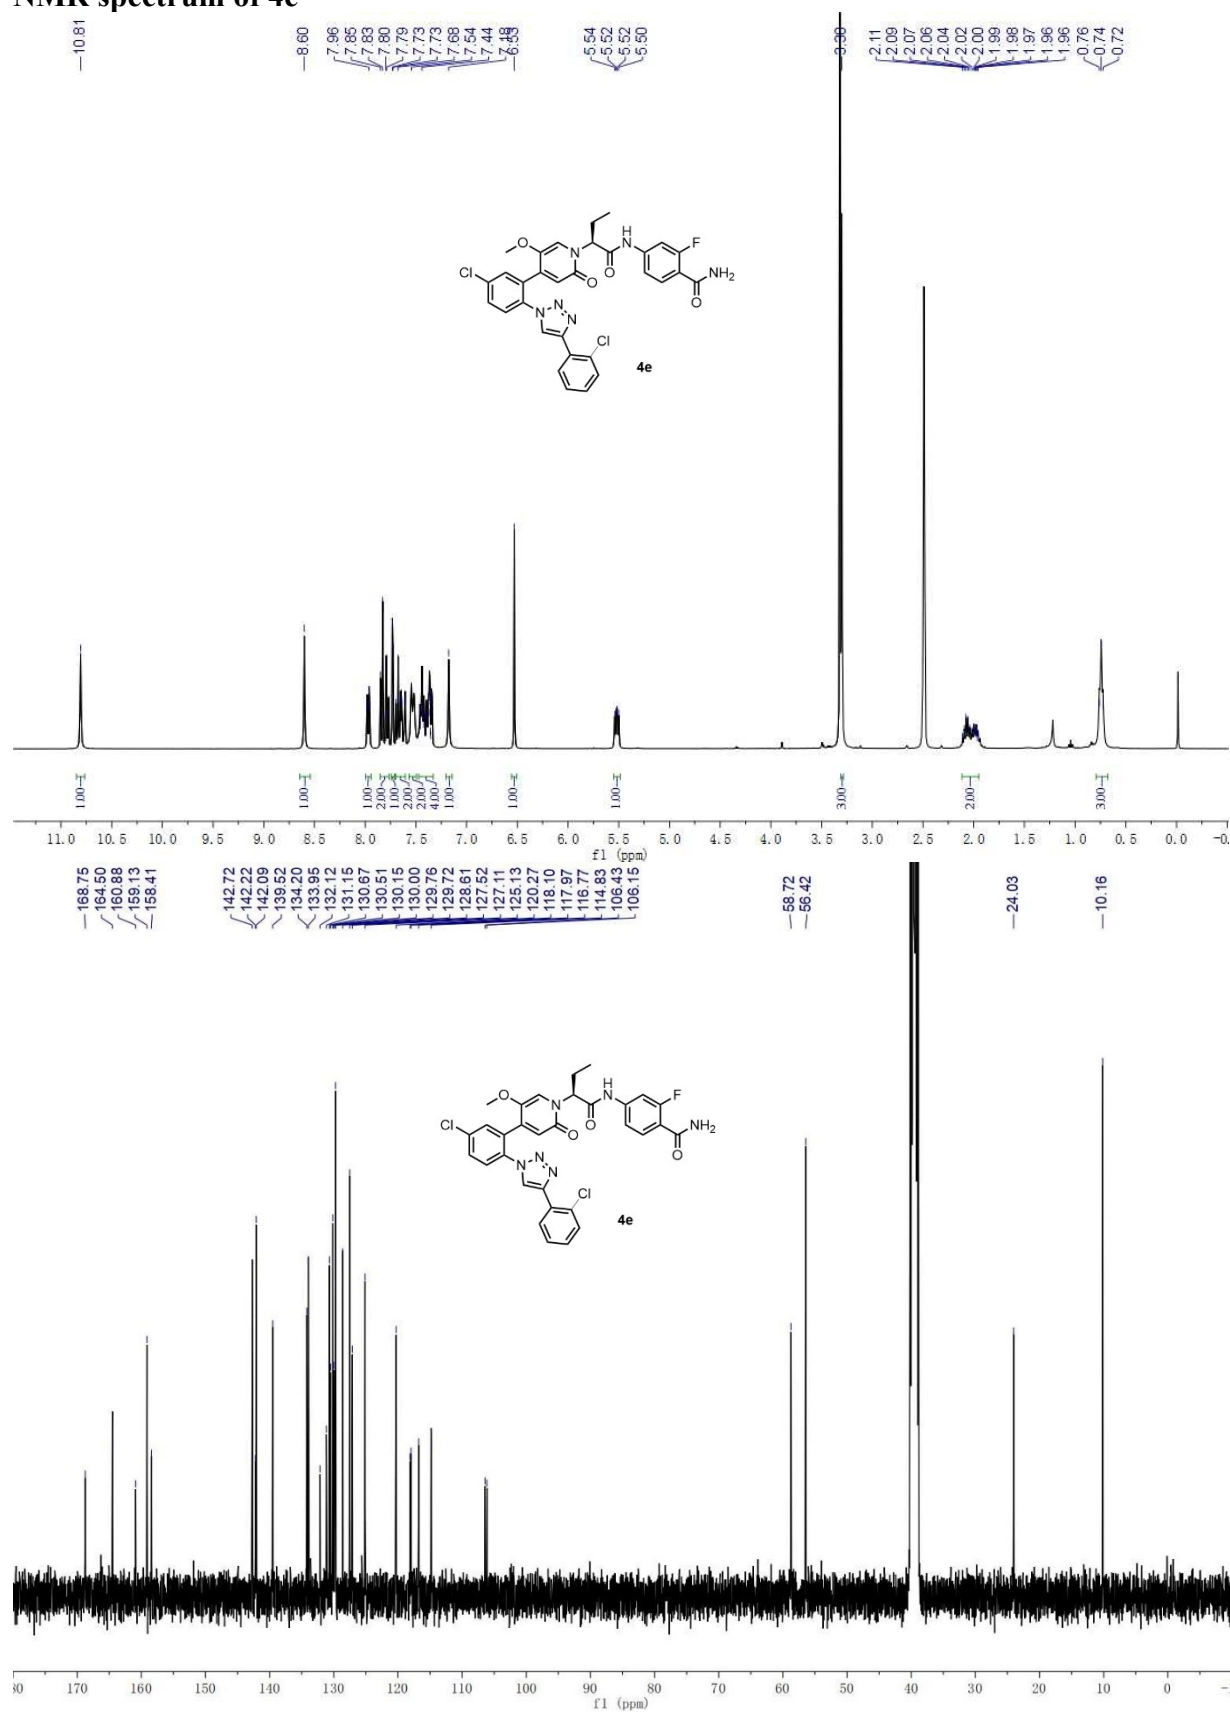

# NMR spectrum of 4f

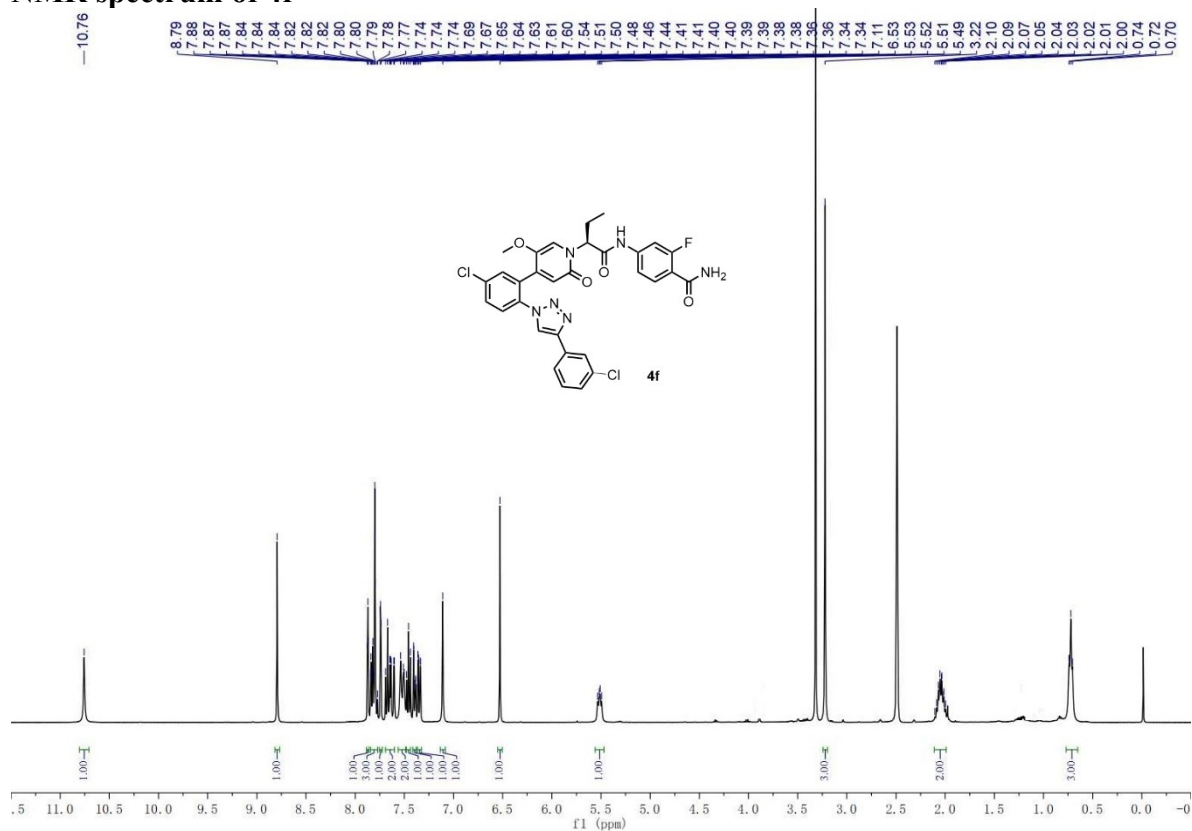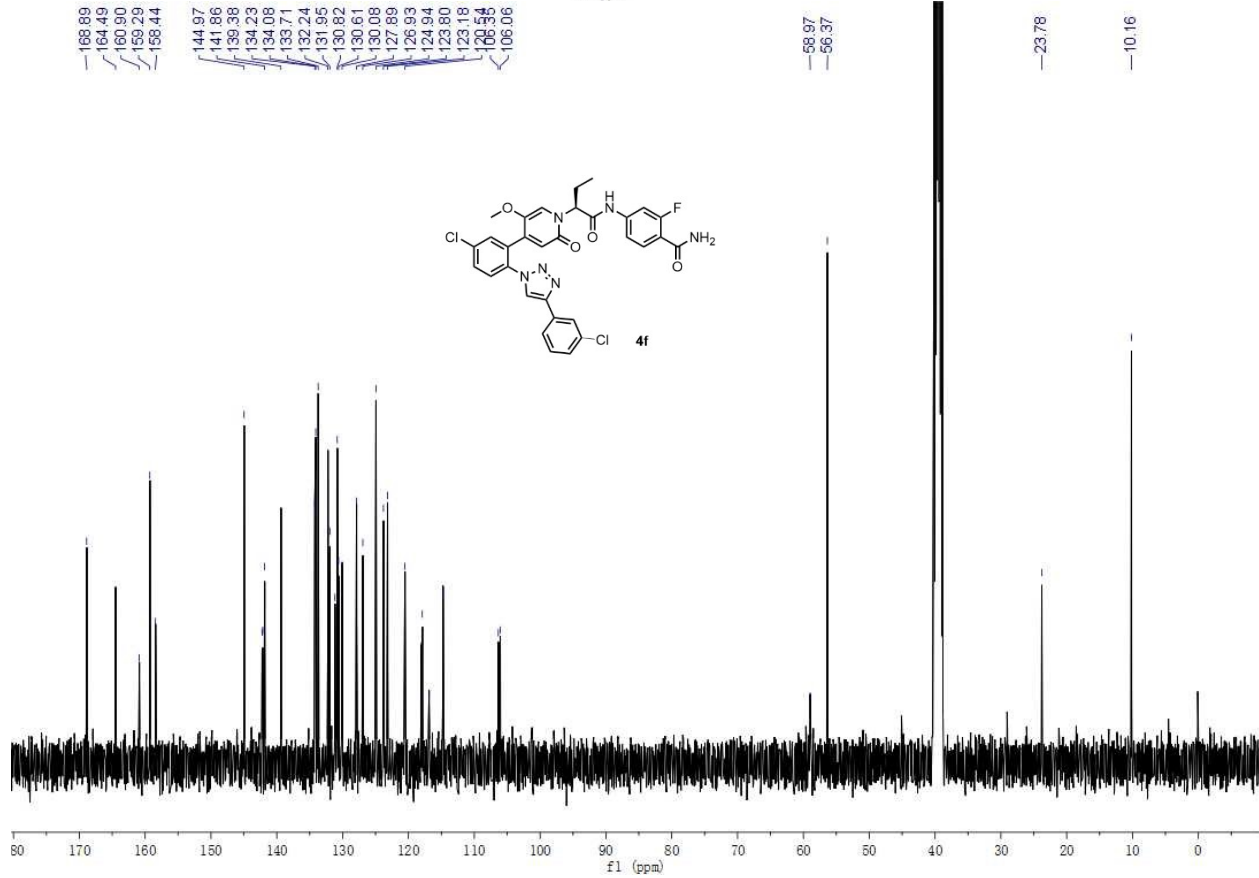

# NMR spectrum of 4g

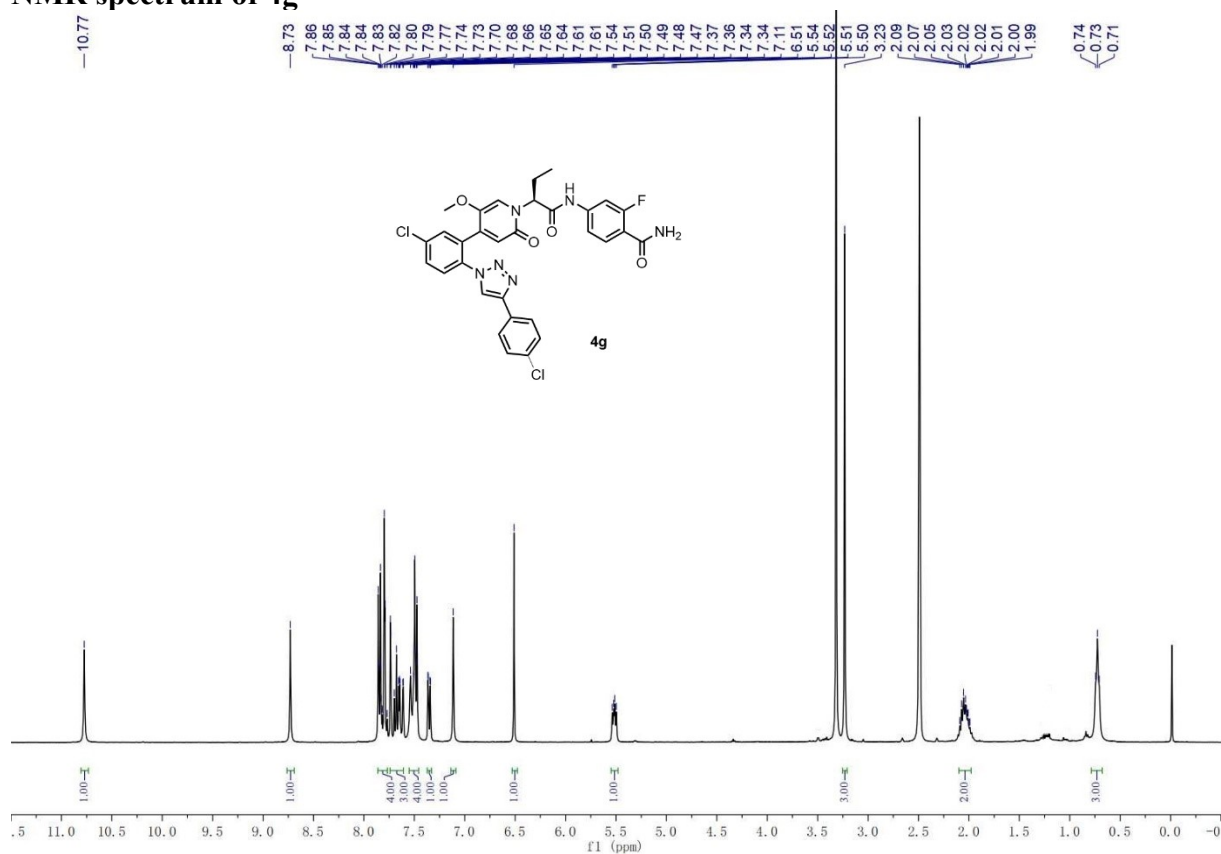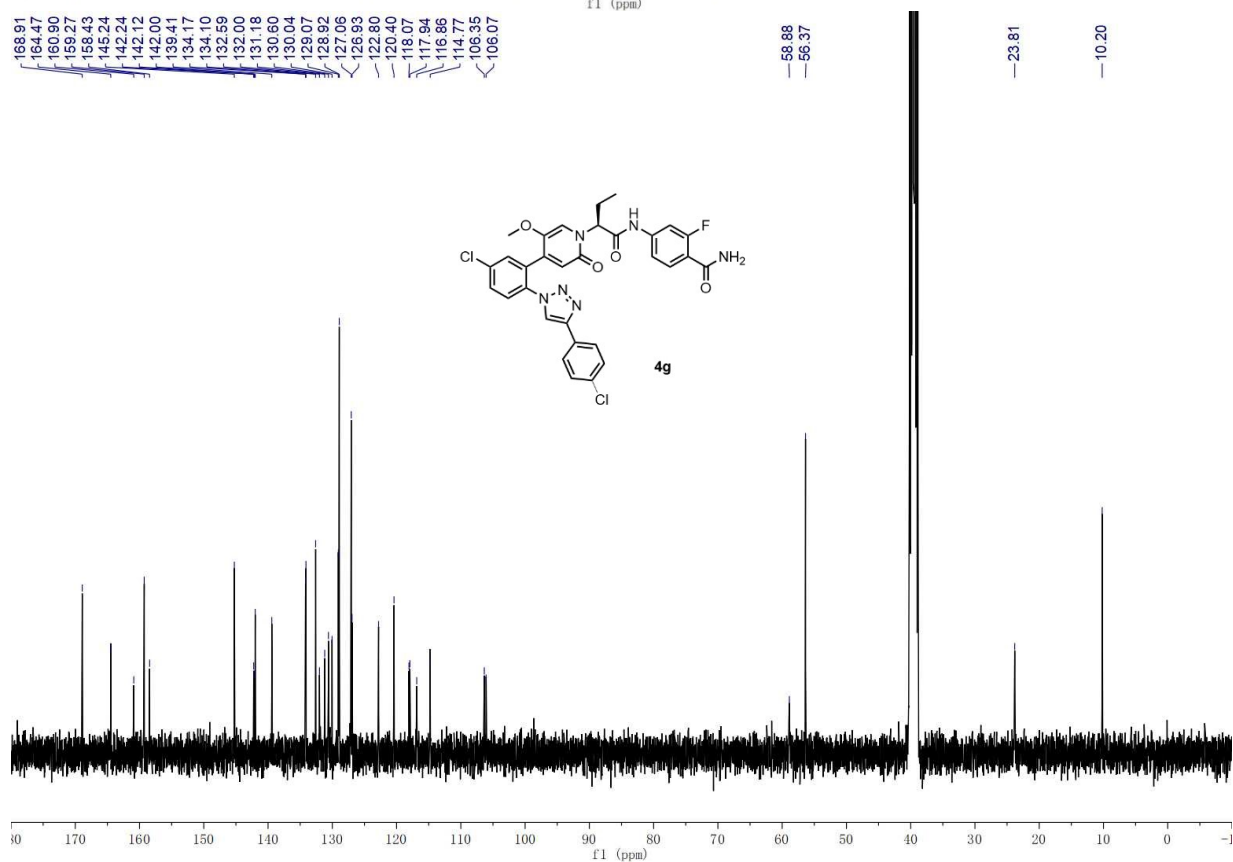



# NMR spectrum of 4h

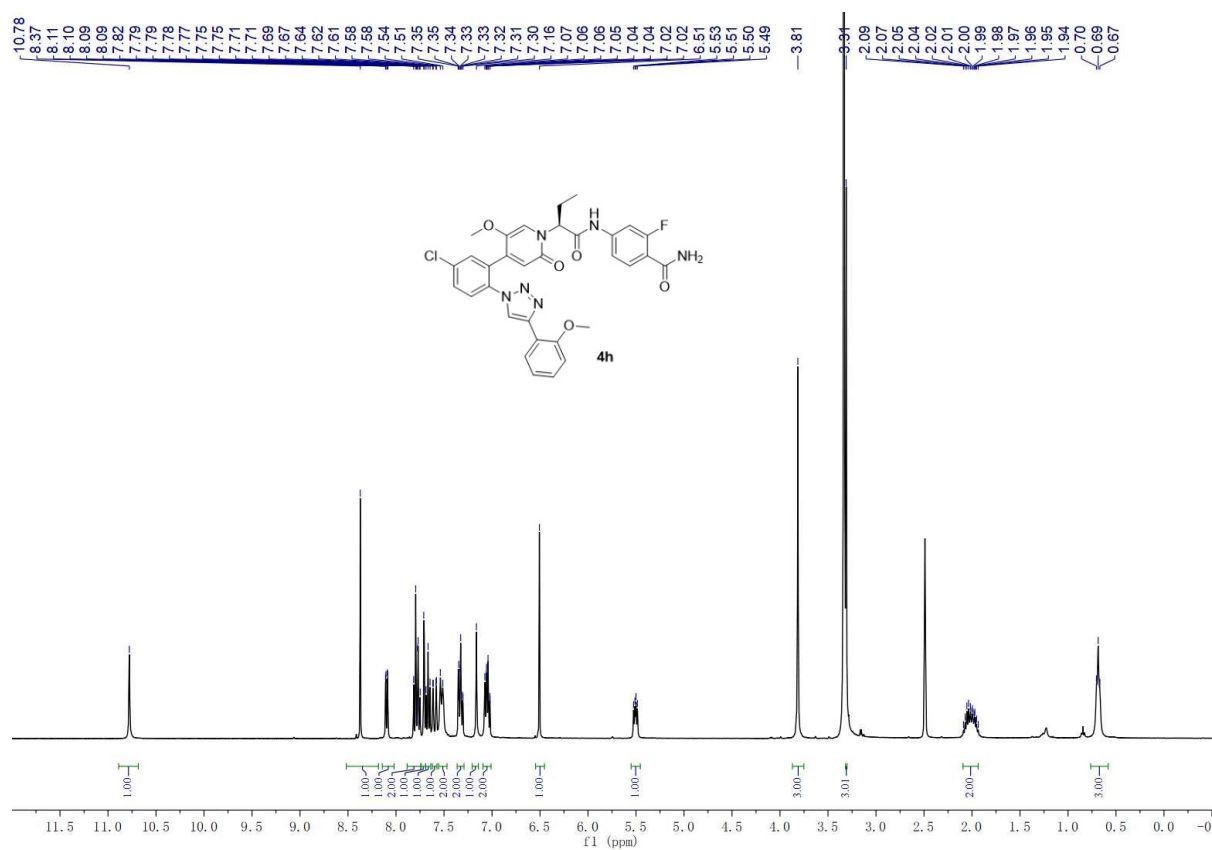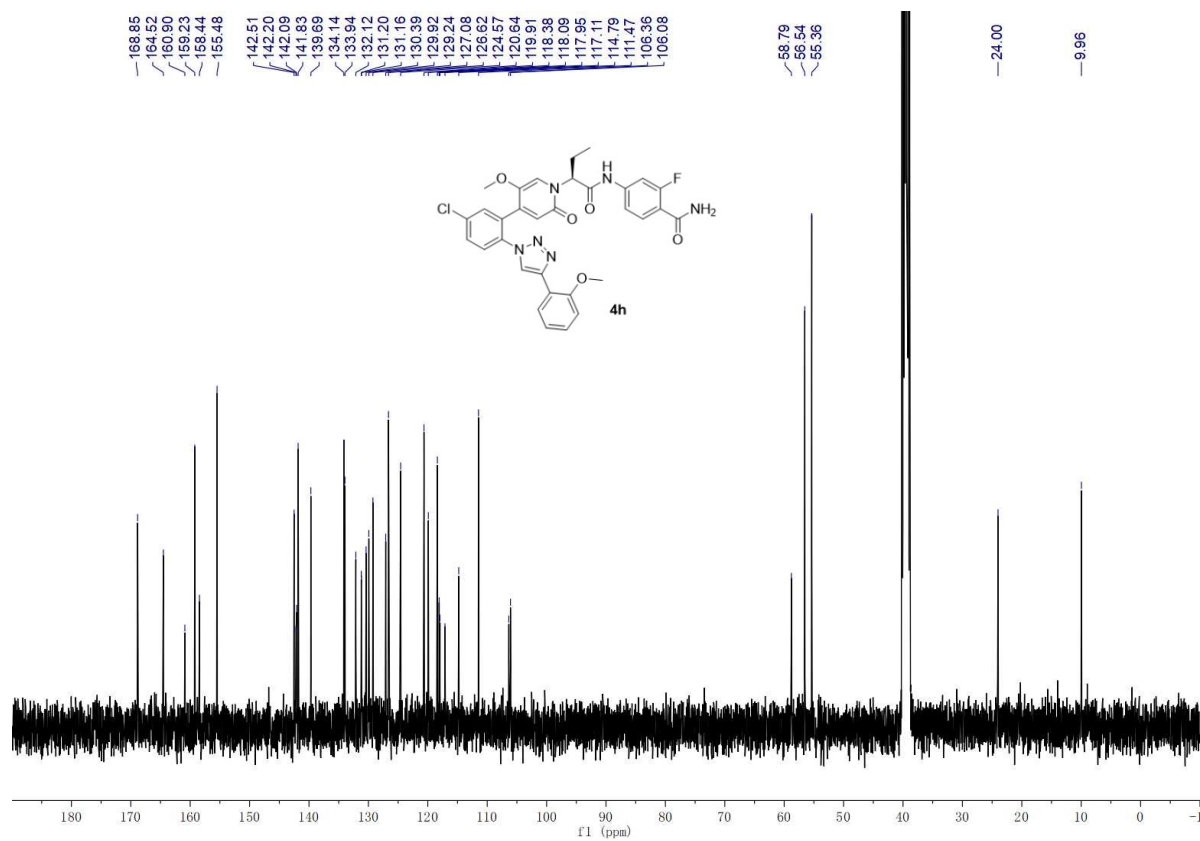

# NMR spectrum of 4i

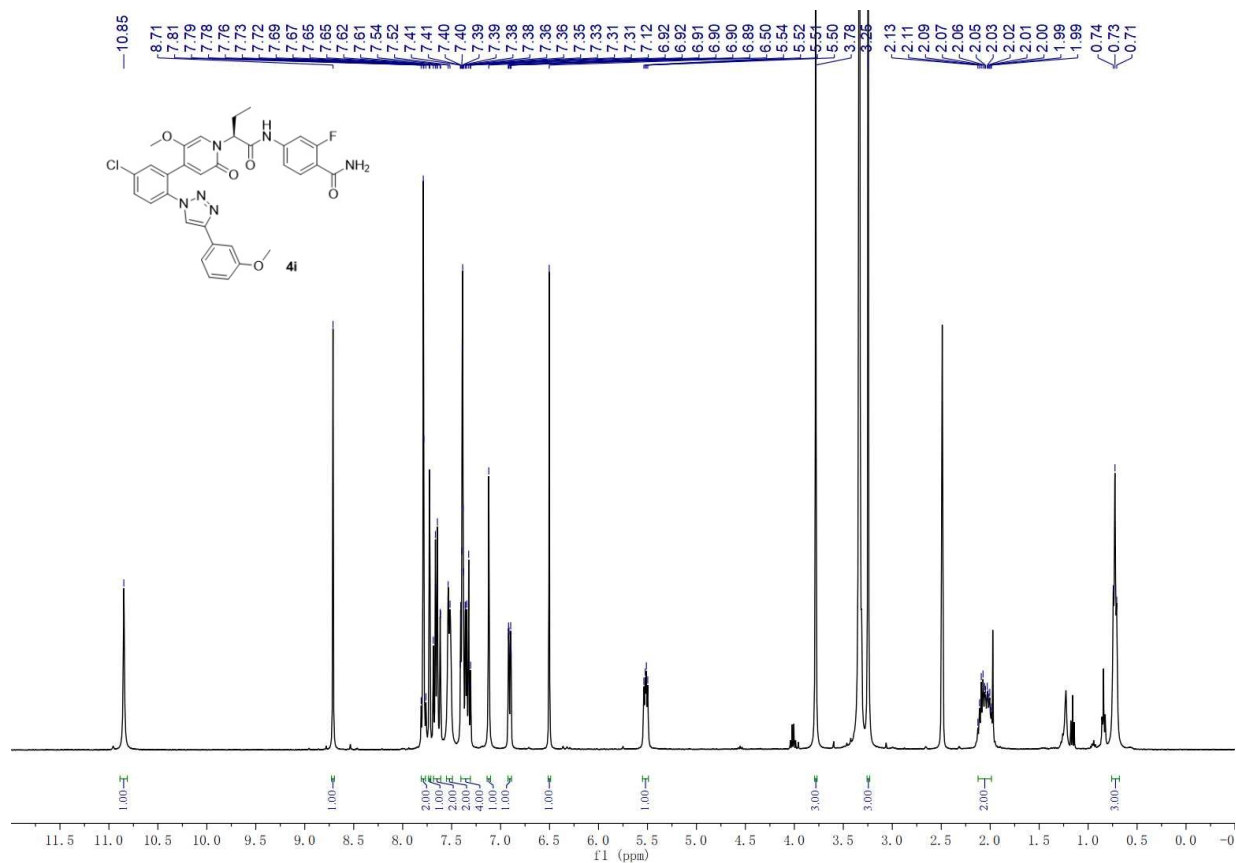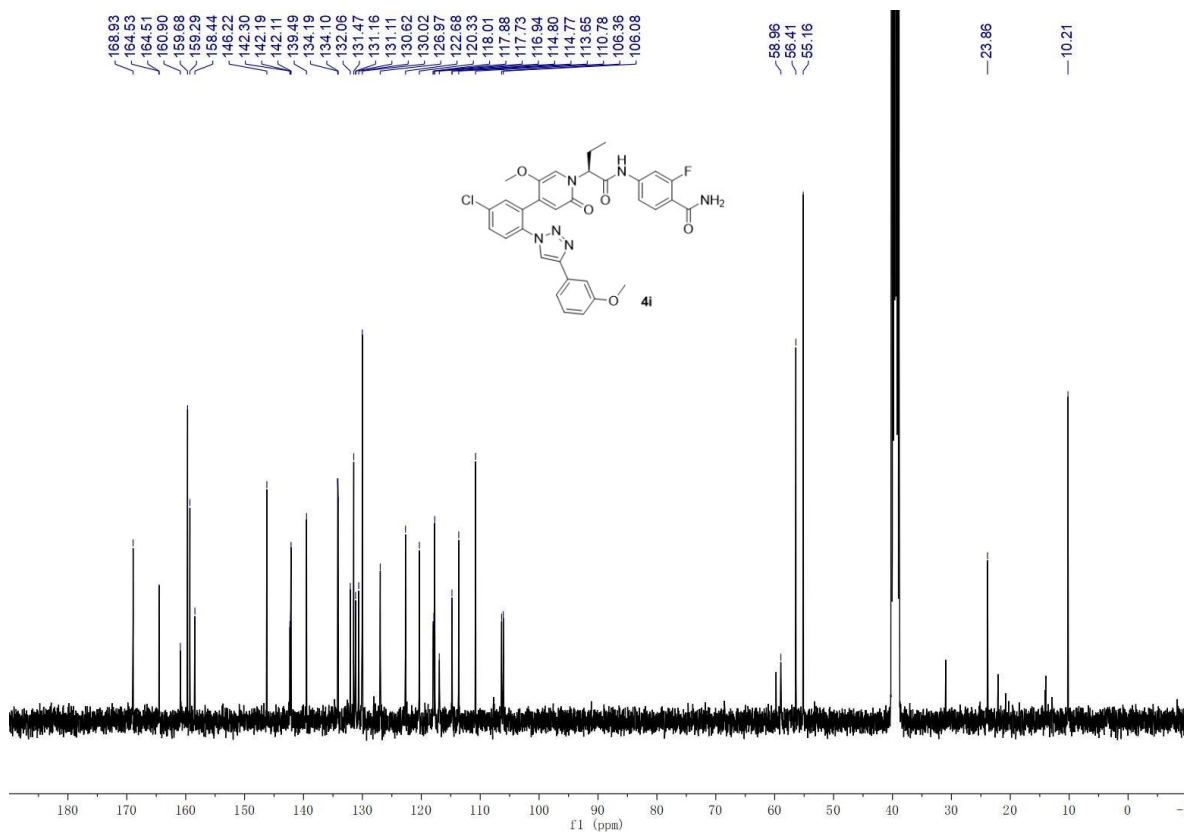

# NMR spectrum of 4j

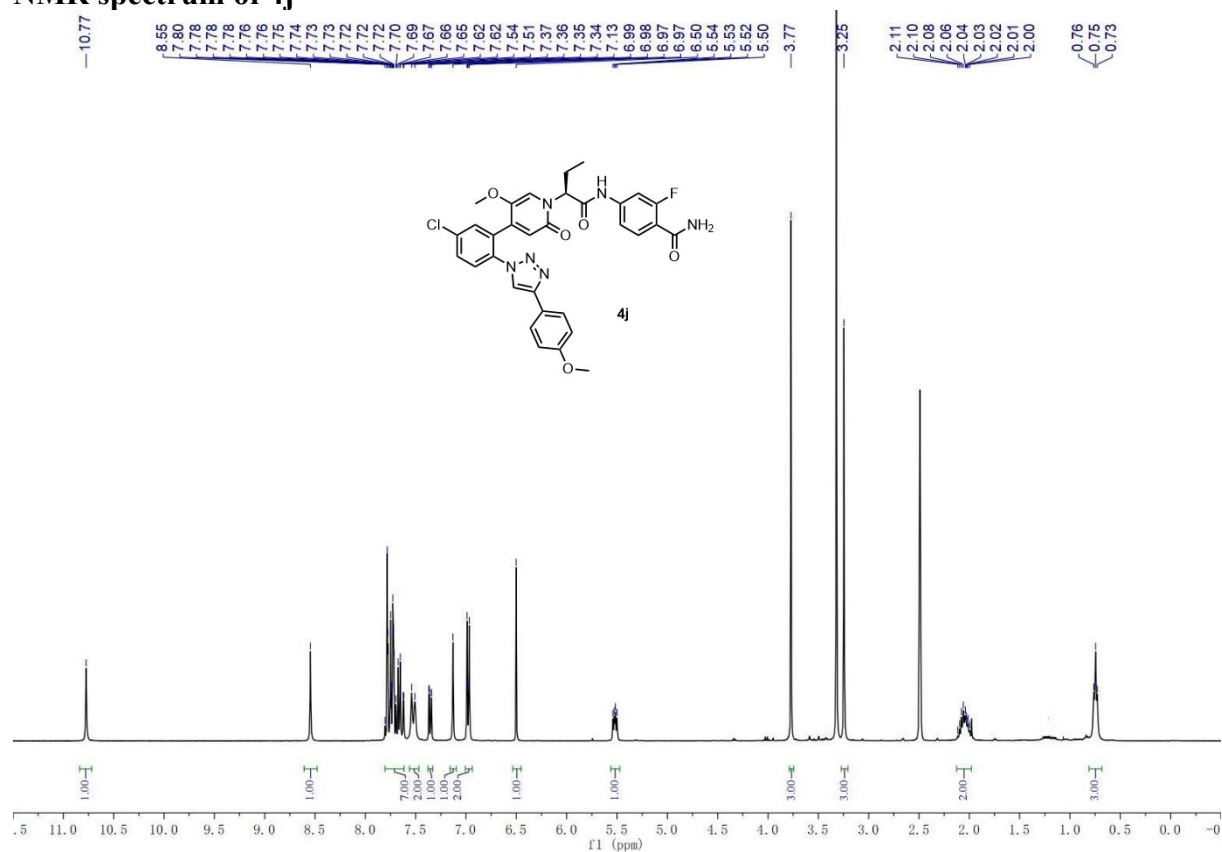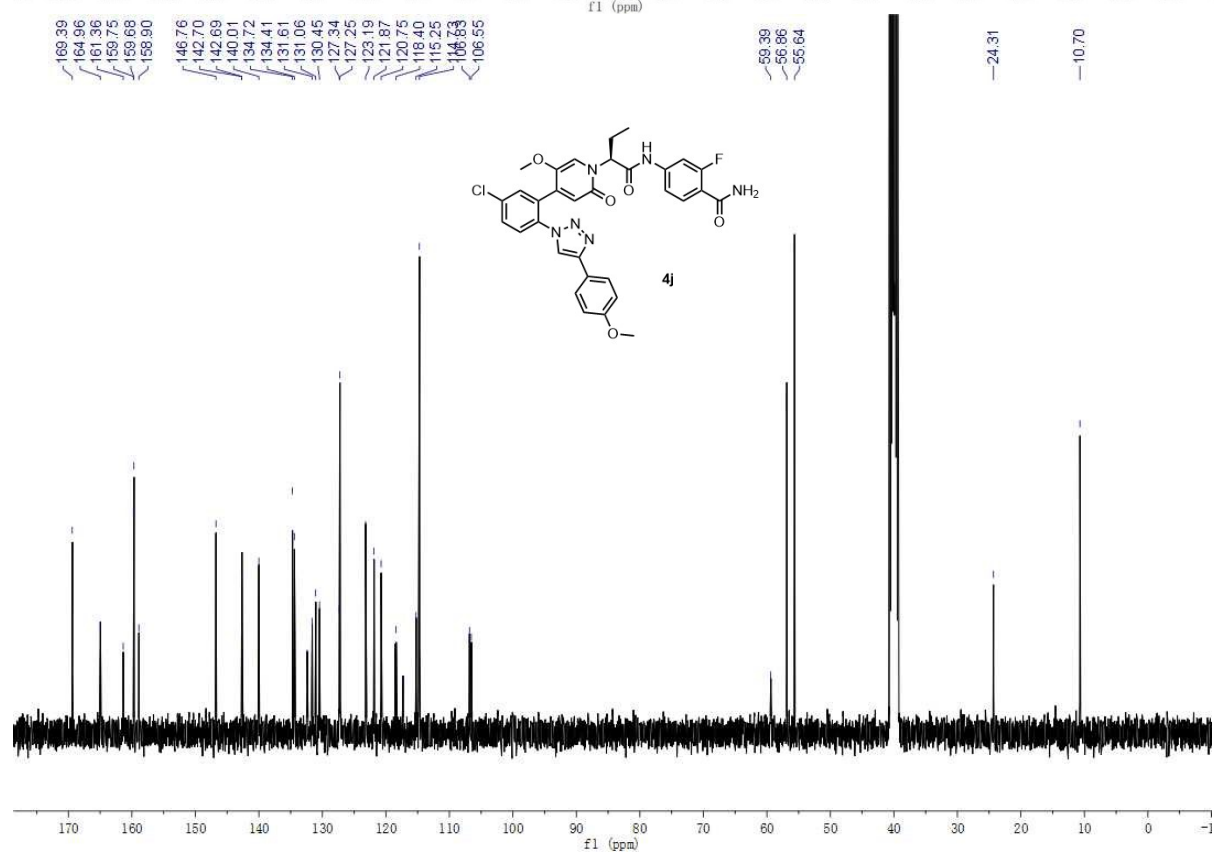

# NMR spectrum of 4k

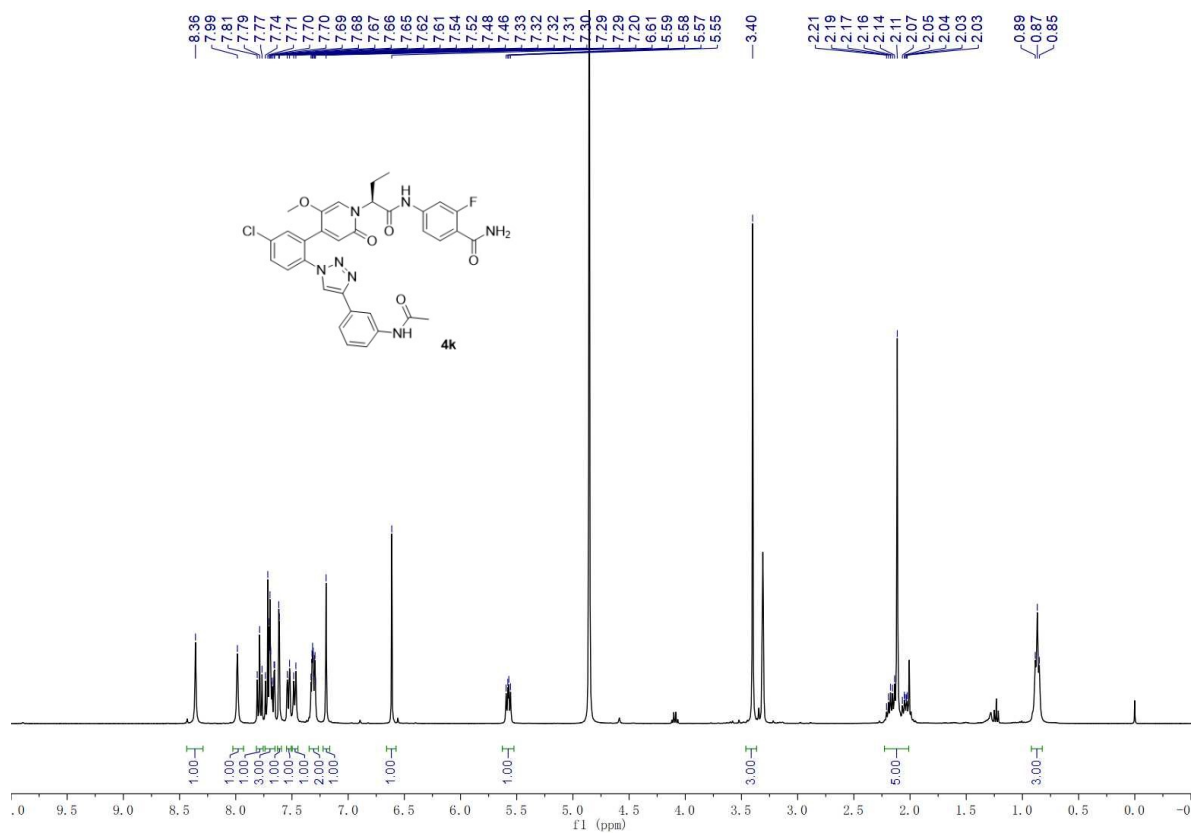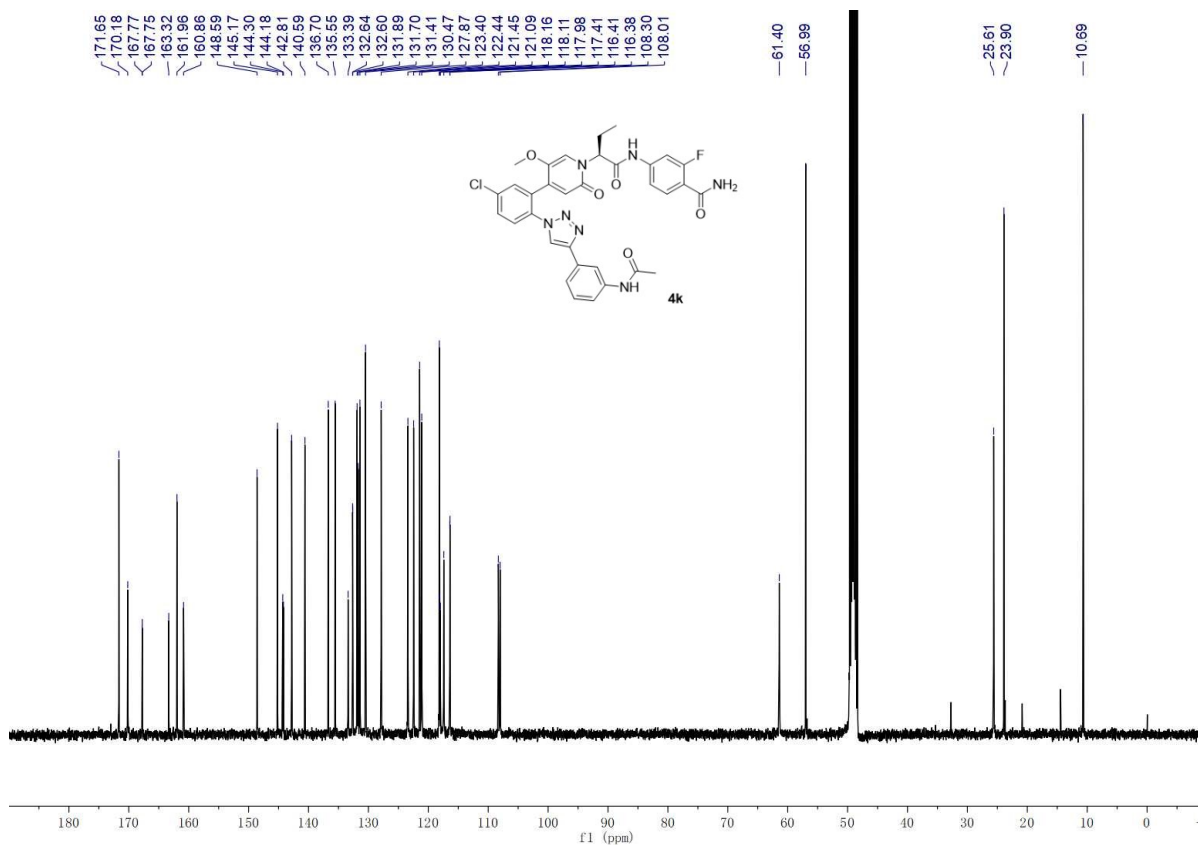

# NMR spectrum of 4l

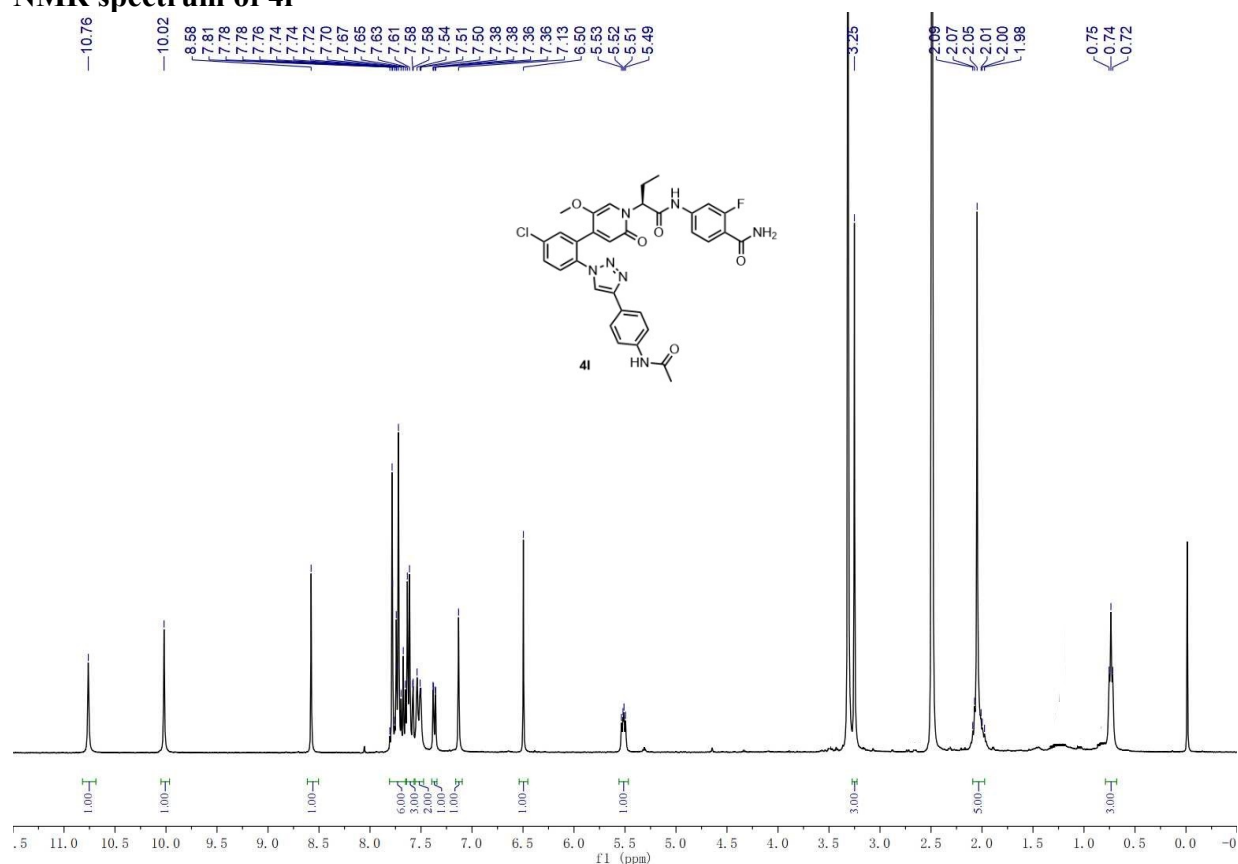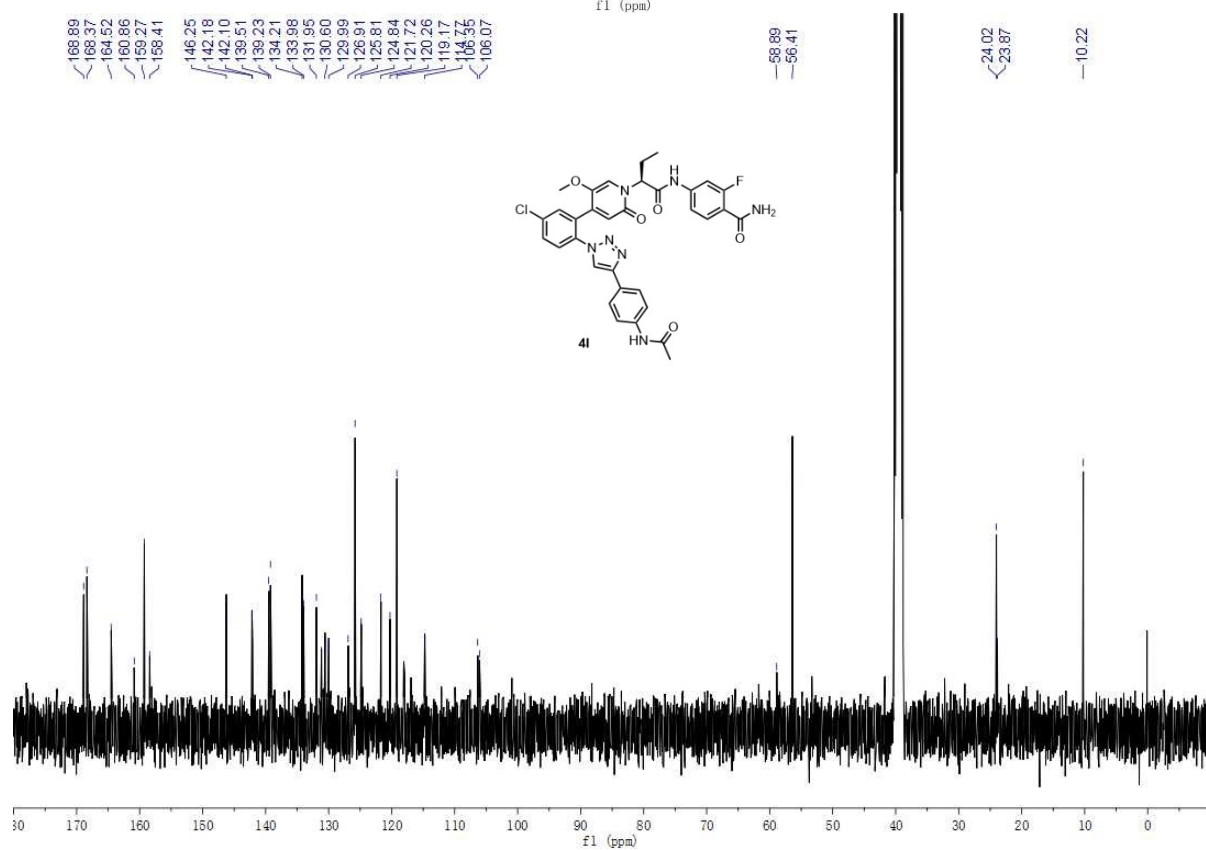

### NMR spectrum of 4m

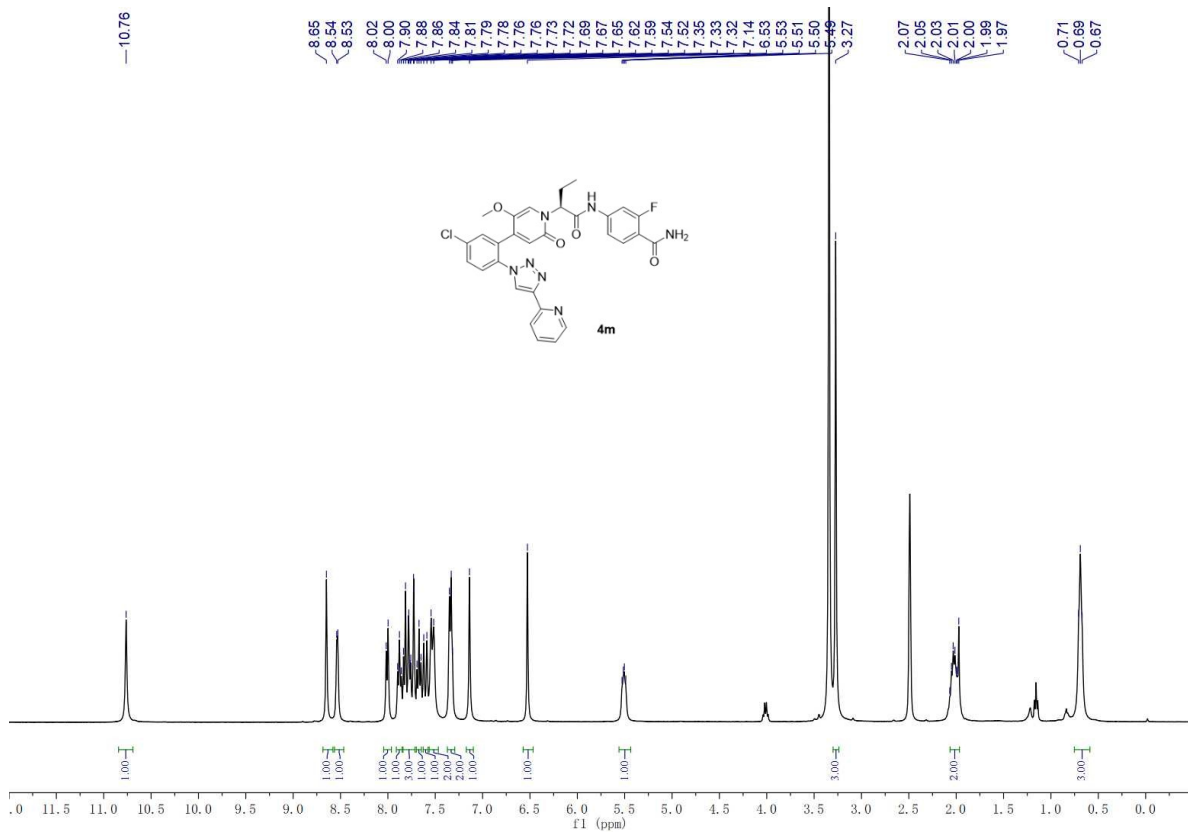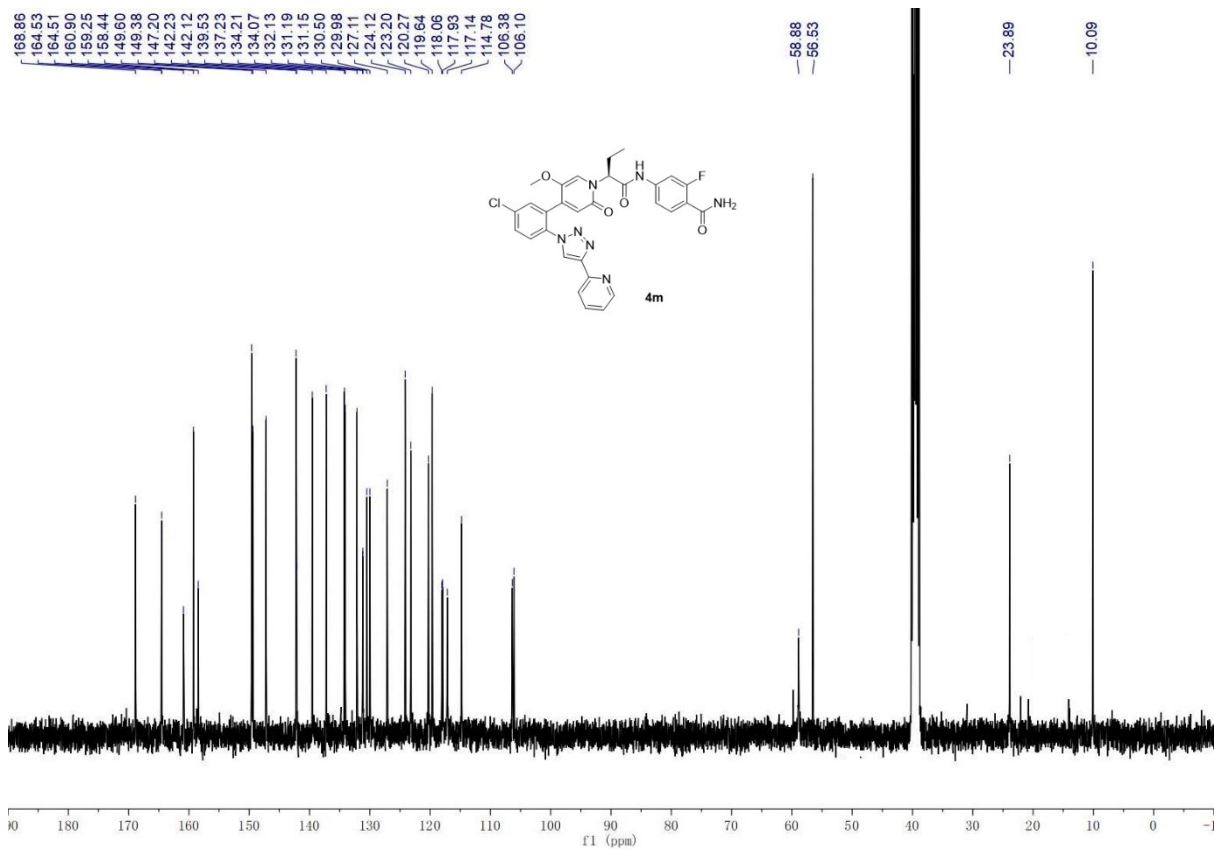

# NMR spectrum of 4n

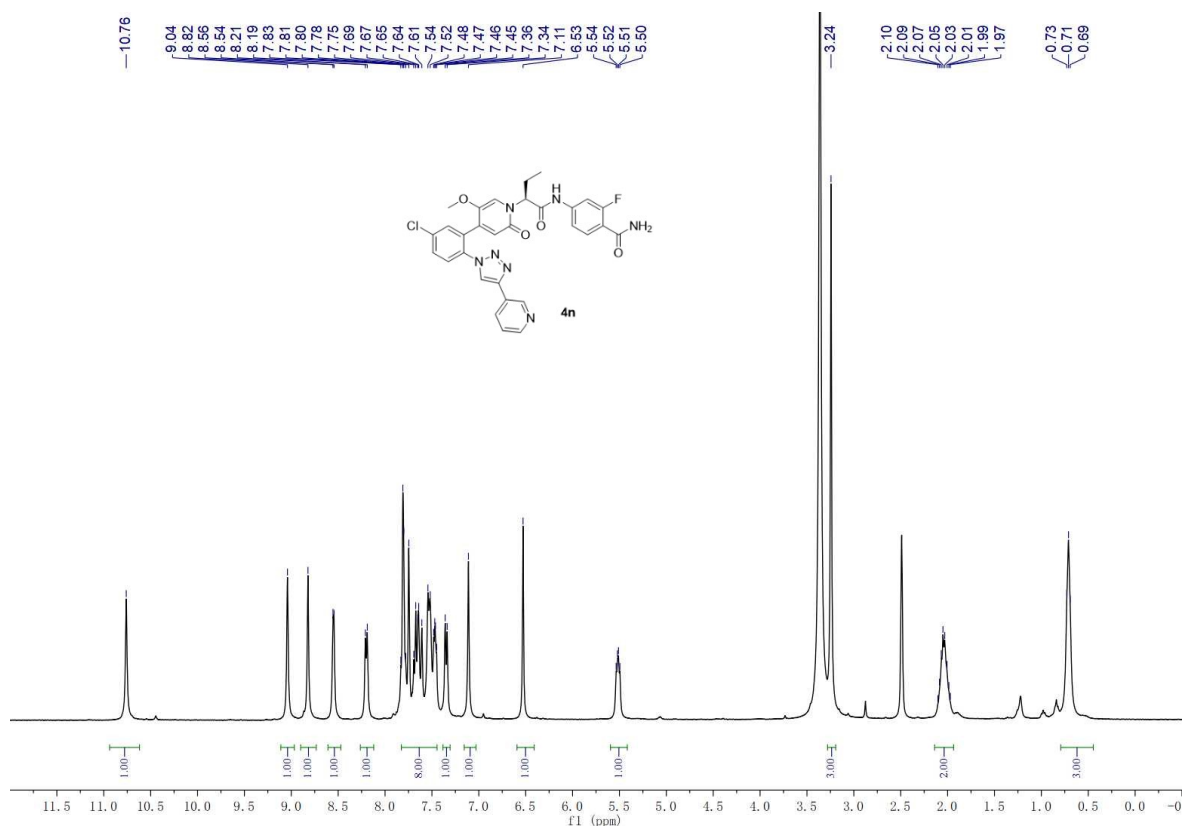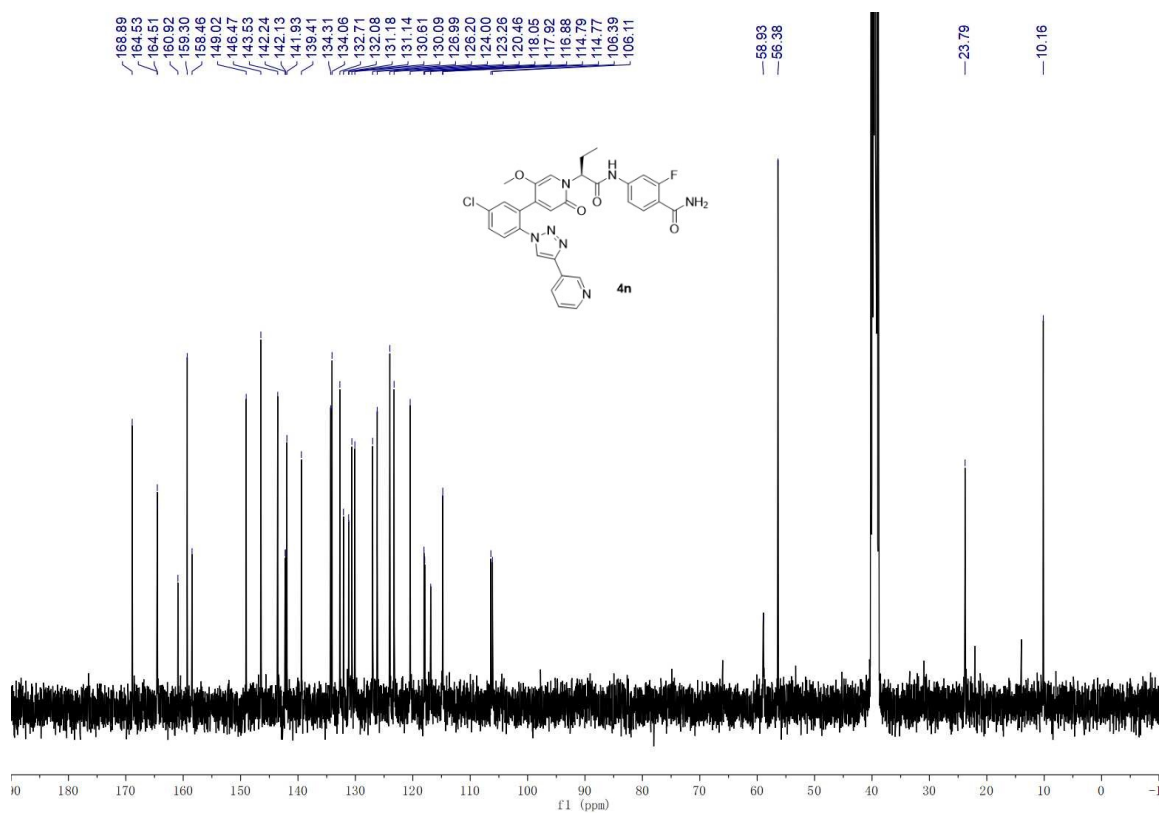

**Spectrum of 4o**

Chemical structure of **4o** is shown above the spectrum.

<sup>1</sup>H NMR spectrum (CDCl<sub>3</sub>) of **4o** is displayed below the structure. The x-axis represents the chemical shift in ppm, ranging from 0.0 to 11.5. The spectrum shows several peaks, with the following chemical shifts (ppm) labeled above the peaks:

8.64, 8.63, 8.48, 8.48, 8.48, 8.47, 8.47, 8.46, 8.46, 7.85, 7.83, 7.80, 7.79, 7.78, 7.77, 7.77, 7.73, 7.68, 7.66, 7.64, 7.61, 7.60, 7.57, 7.57, 7.54, 7.51, 7.49, 7.48, 7.47, 7.46, 7.45, 7.34, 7.34, 7.32, 7.32, 7.14, 7.14, 6.53, 5.52, 5.51, 5.51, 5.50, 5.48, 5.27, 2.69, 2.07, 2.05, 2.03, 2.01, 2.00, 2.00, 1.99, 1.98, 1.95, 0.71, 0.69, 0.67.

Integration values are shown below the baseline: 1.00, 1.00, 3.00, 1.00, 1.00, 2.00, 1.00, 1.00, 1.00, 1.00, 3.00, 2.00, 3.00.

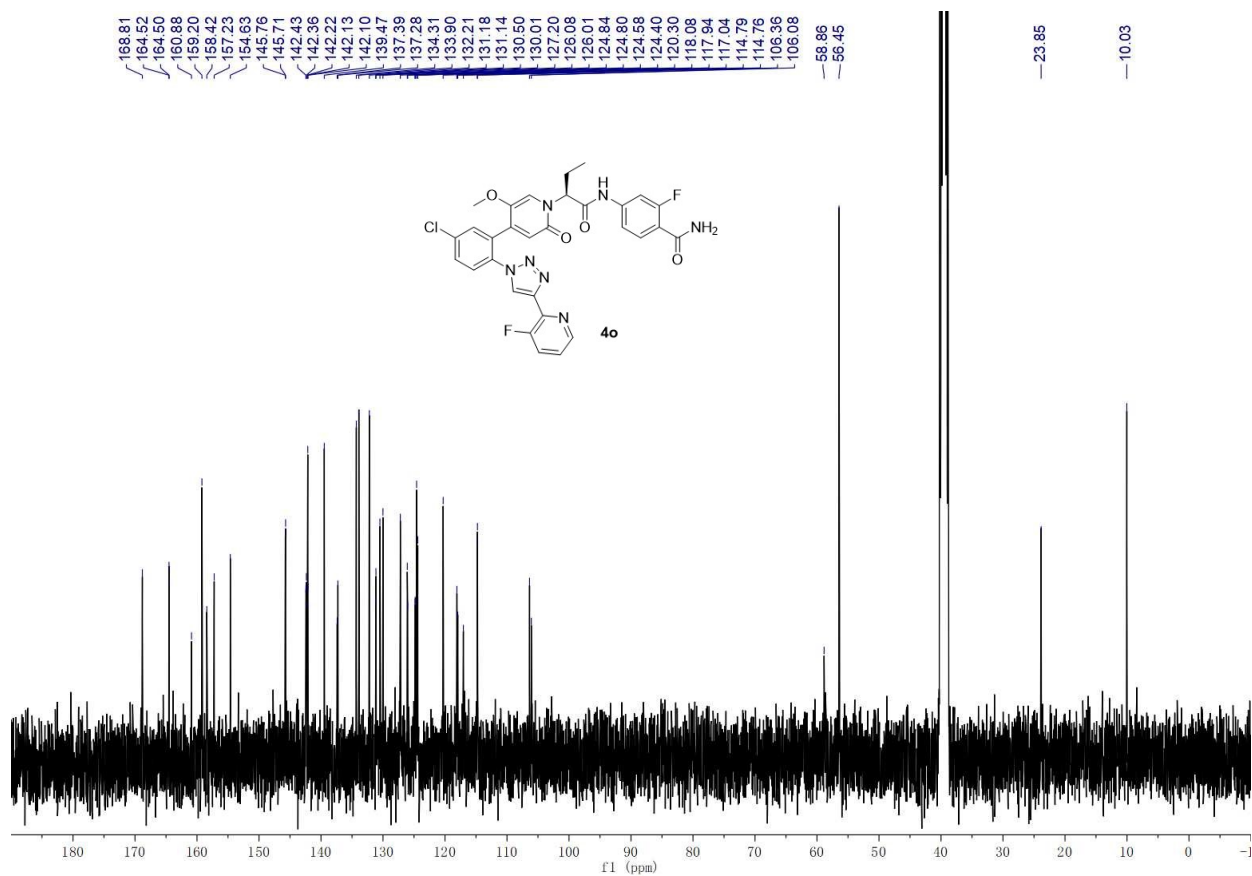



# NMR spectrum of 4p

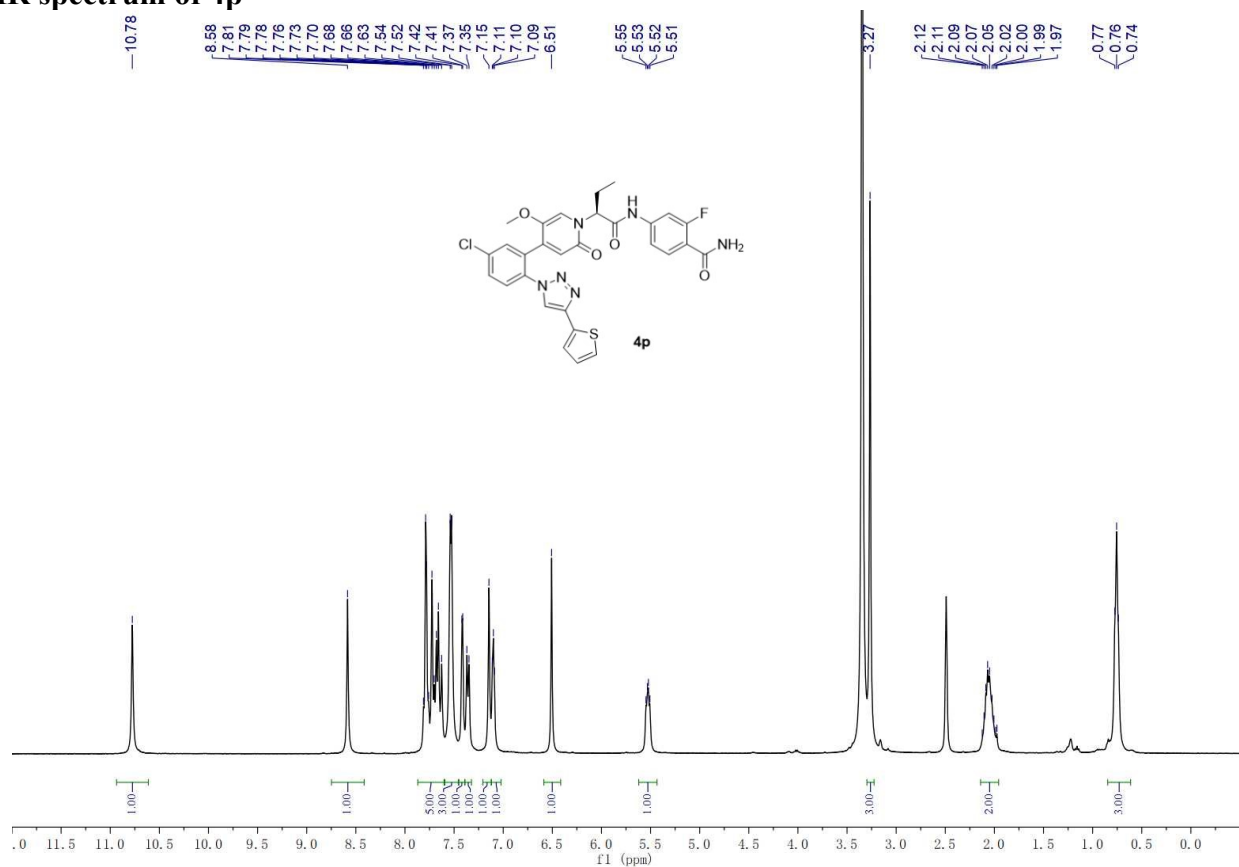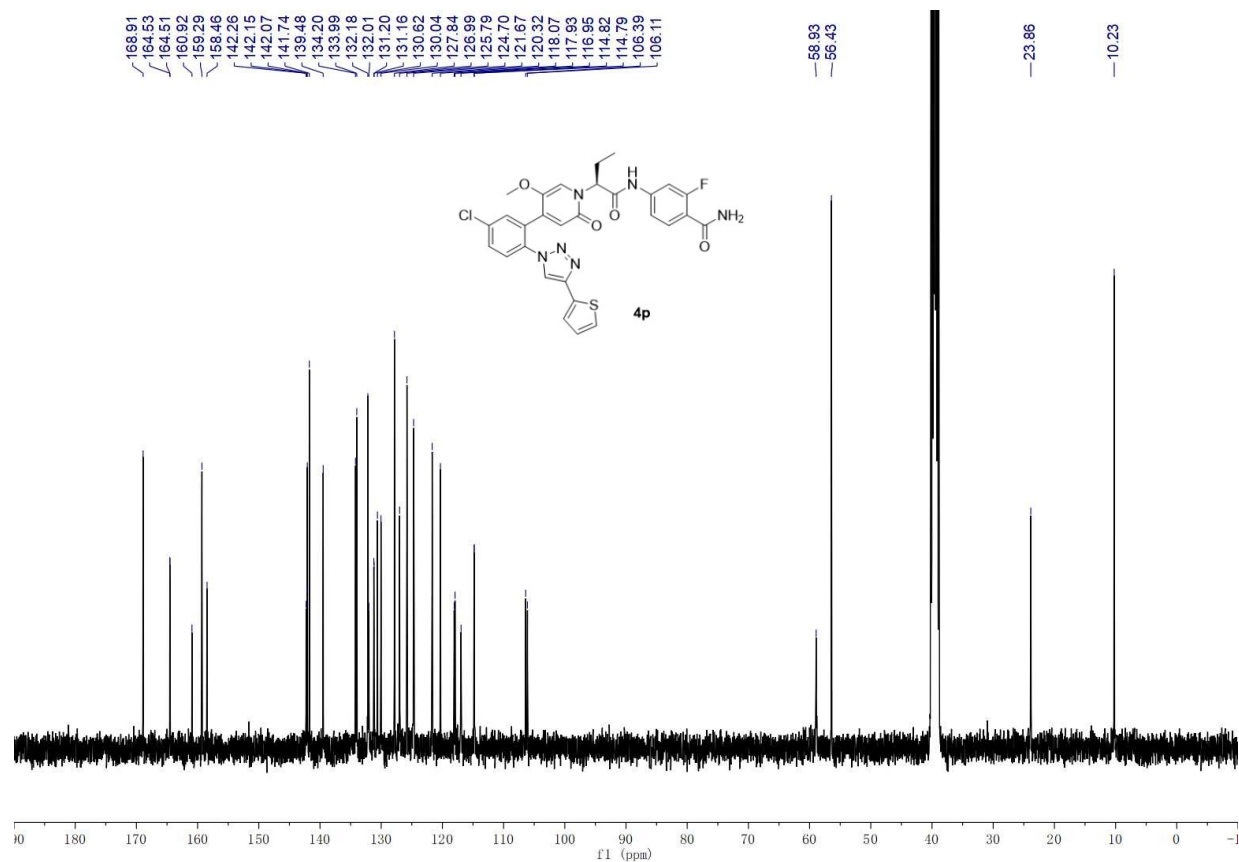

# NMR spectrum of 4q

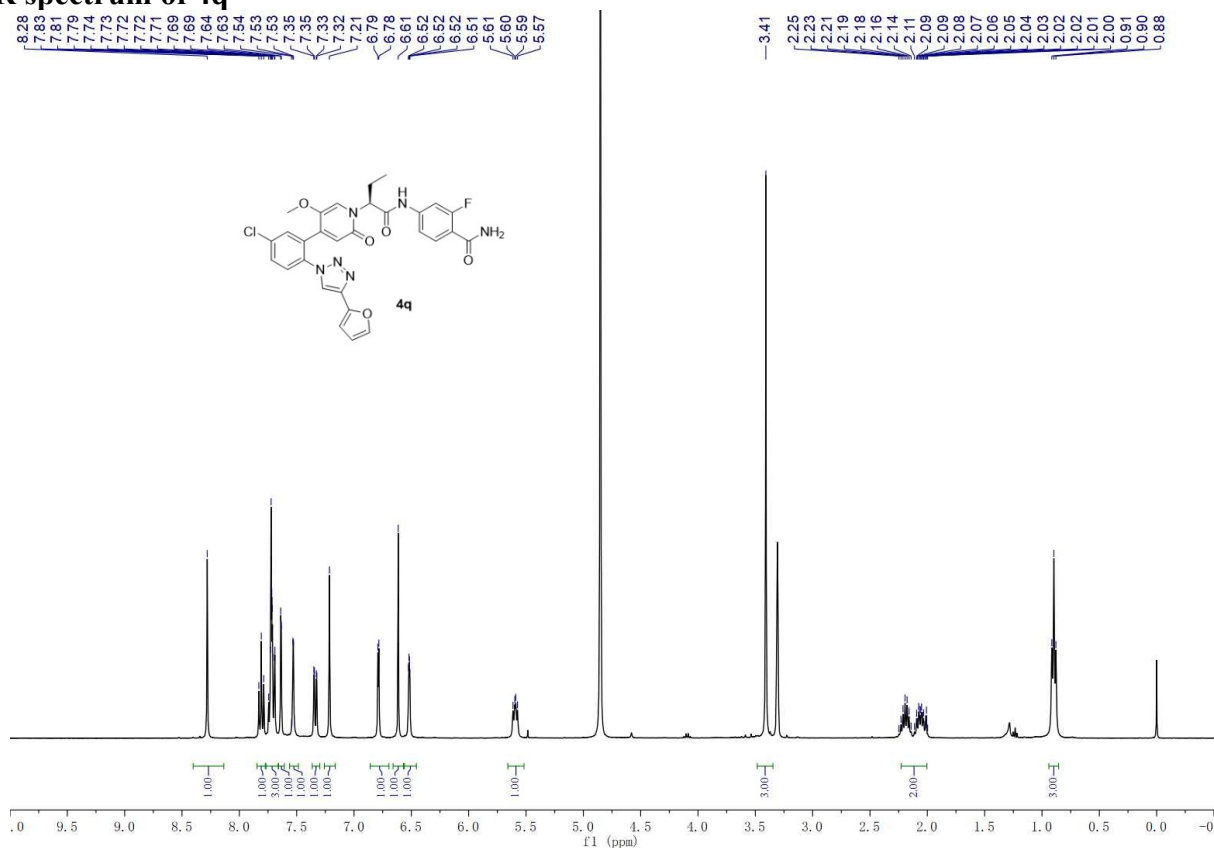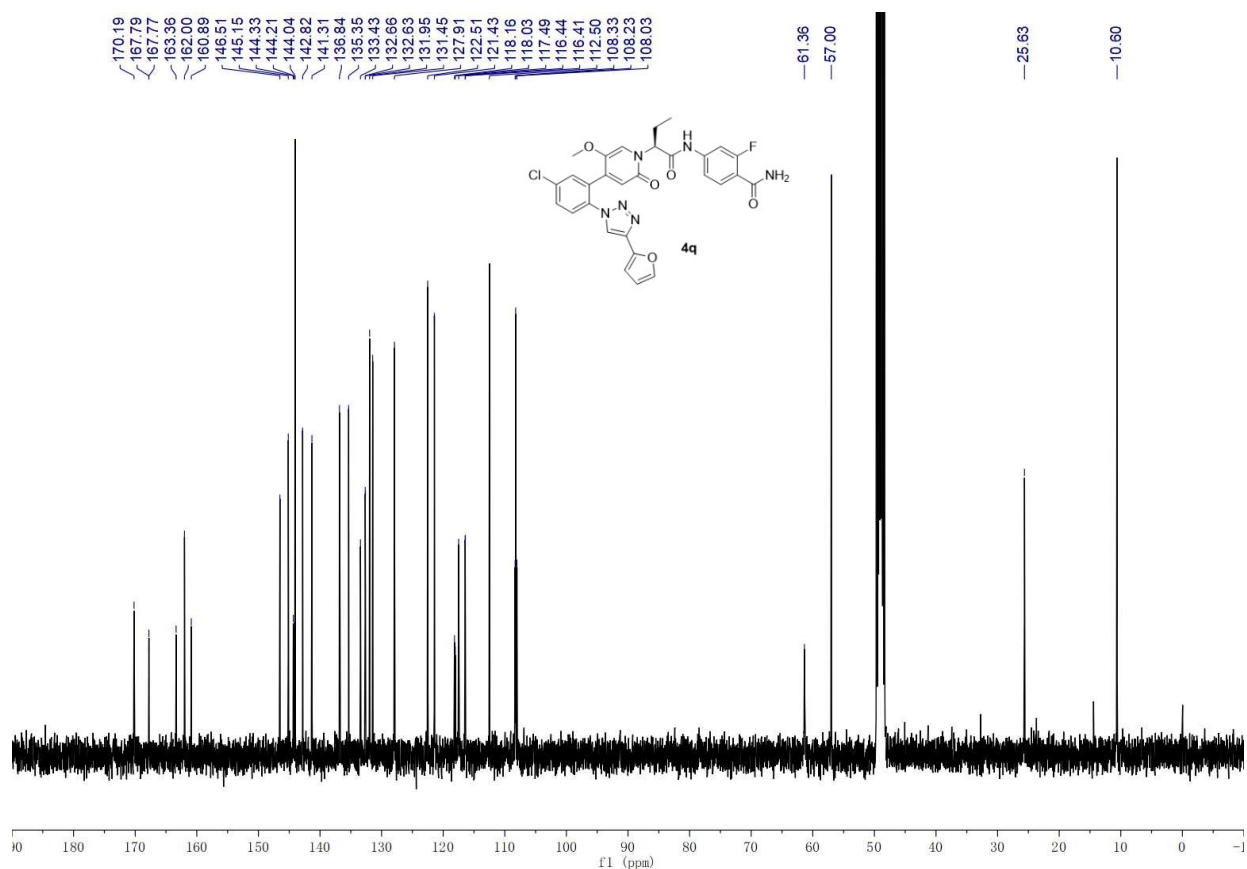

**NMR spectrum of 4r**

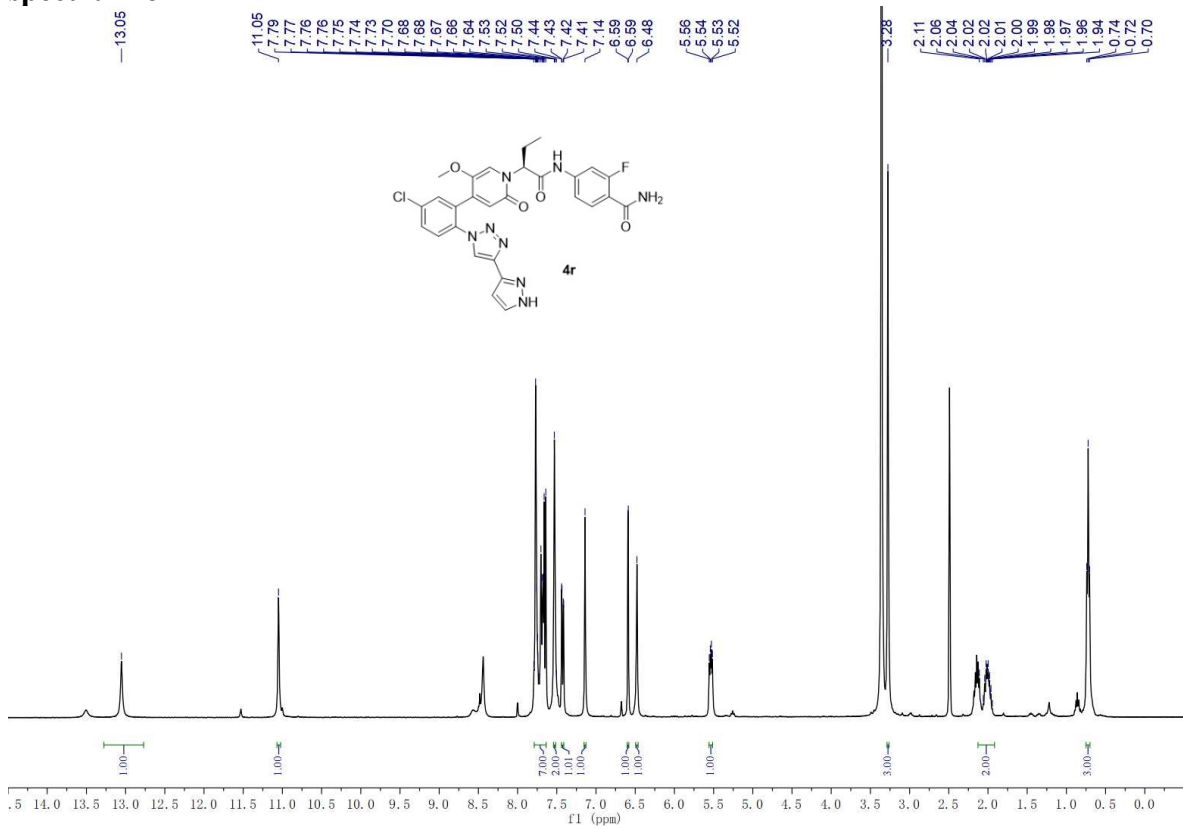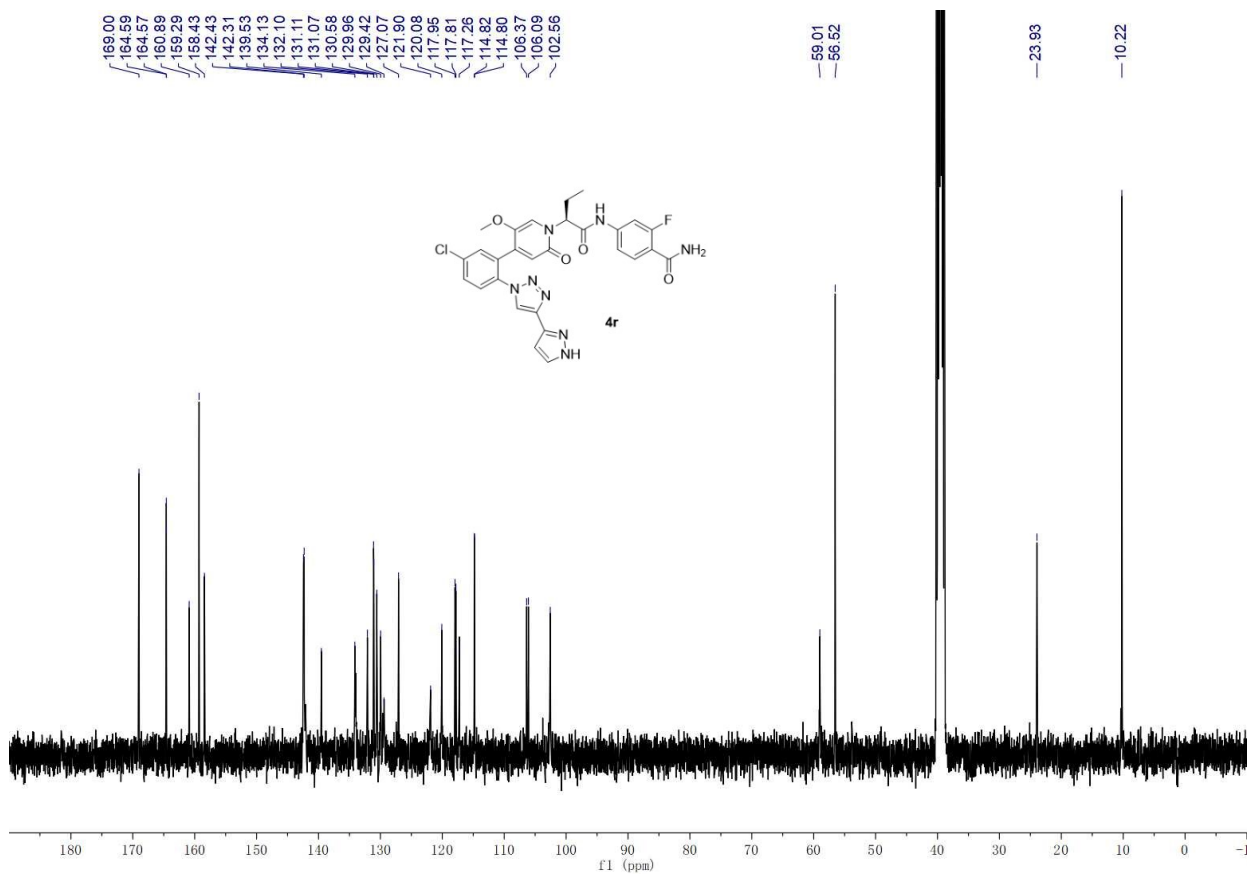

# NMR spectrum of 4s

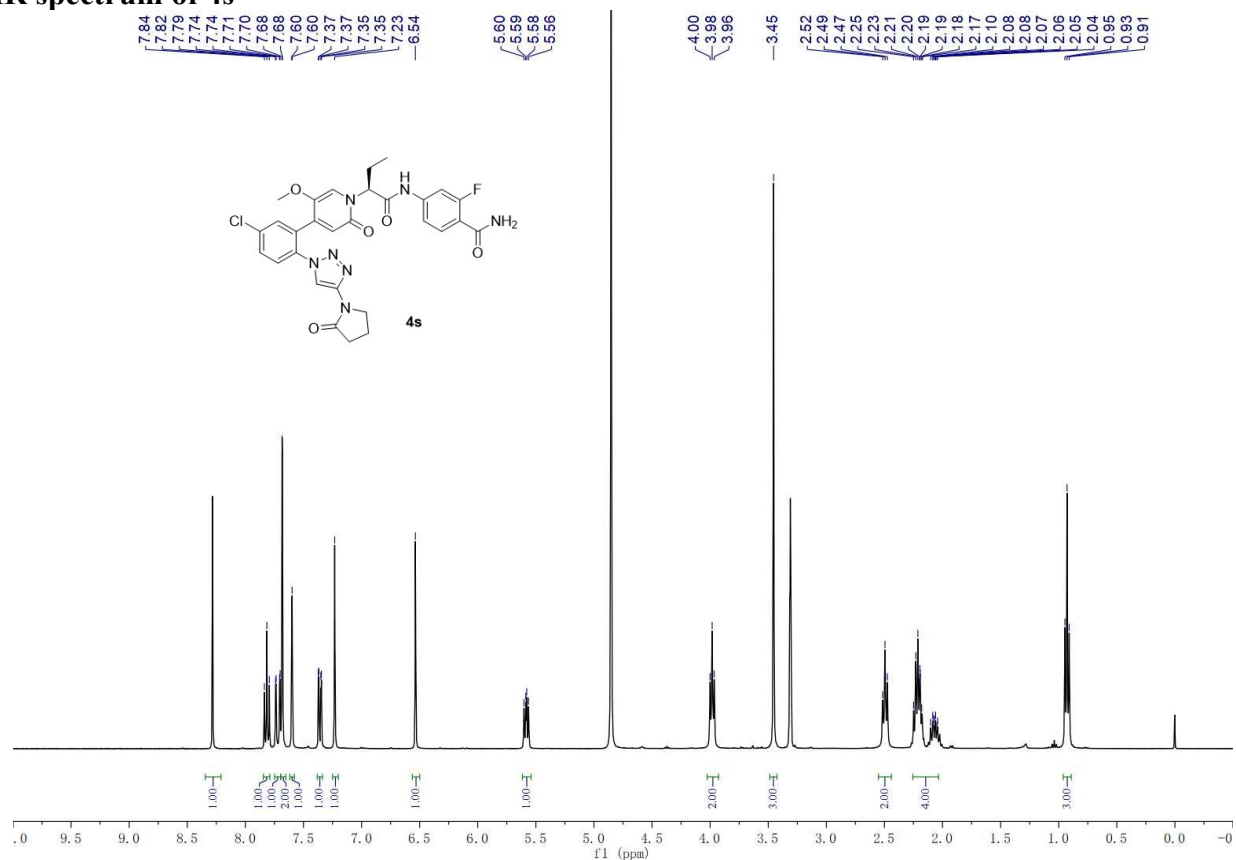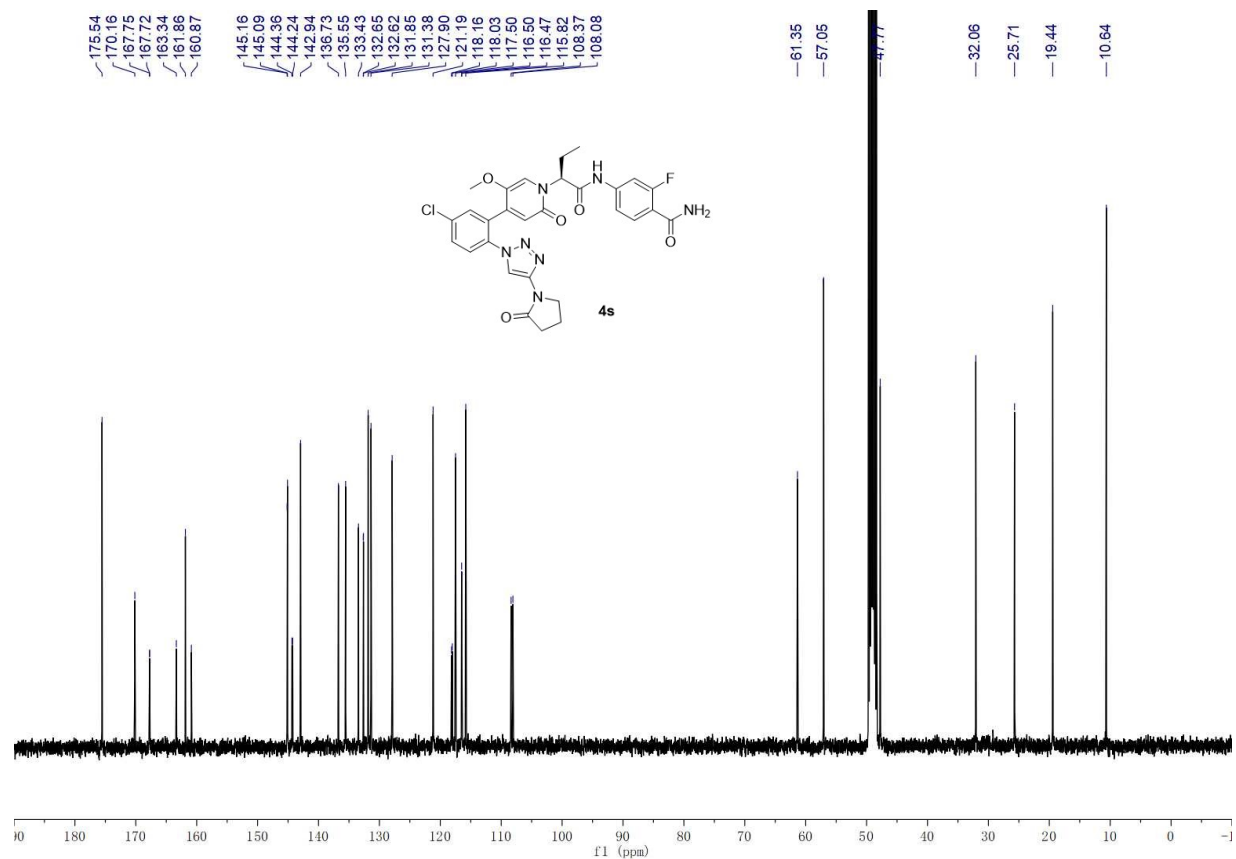

# NMR spectrum of 4t

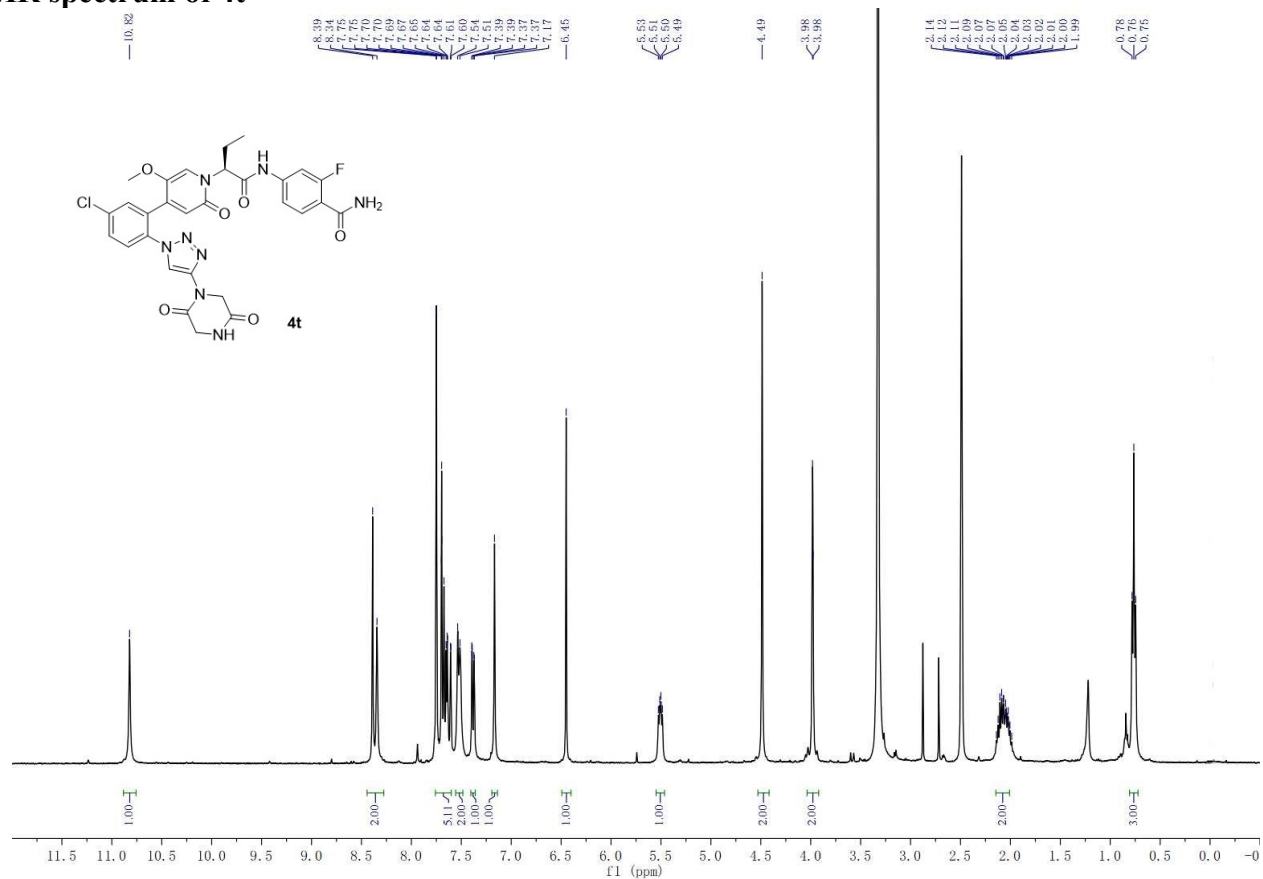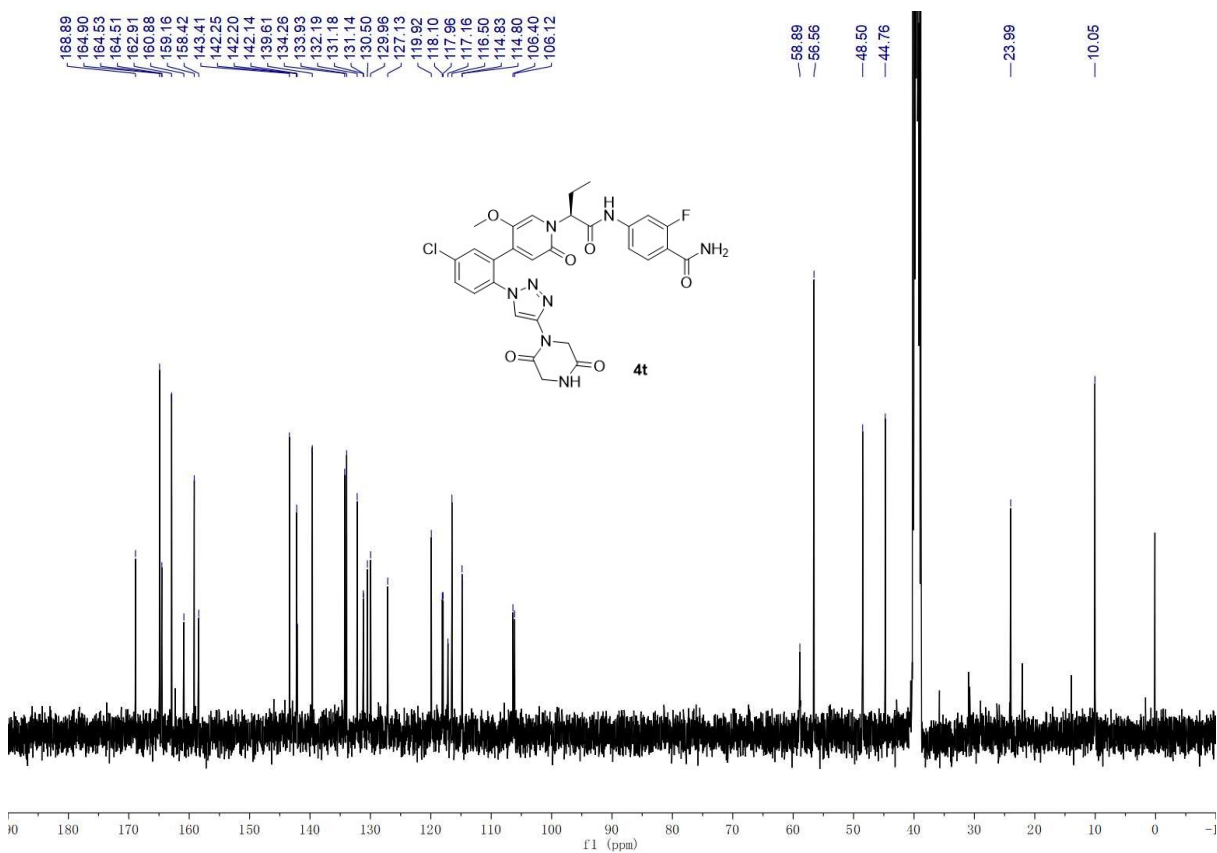

## Purity data of tested compounds

The general purity of the compounds was determined by HPLC using the following methods. HPLC analyses were conducted on a Waters e2695 system equipped with a 2998 PDA detector. A Kromasil C18 Column (5  $\mu$ m, 4.6\*150 mm) was used at 35 °C. The other tested compounds were dissolved in CH<sub>3</sub>CN. The volume of each injection was 10  $\mu$ L. The detection wavelength was 220 nm.

Flow rate: 1ml/min      Eluent A: CH<sub>3</sub>CN      Eluent B: 10mM NH<sub>4</sub>H<sub>2</sub>PO<sub>4</sub>(pH=3.0)

Gradient elution method is as follows:

|       |    |    |    |    |    |
|-------|----|----|----|----|----|
| t/min | 0  | 40 | 50 | 51 | 60 |
| A%    | 15 | 80 | 80 | 15 | 15 |
| B%    | 85 | 20 | 20 | 85 | 85 |

### Compound 4a

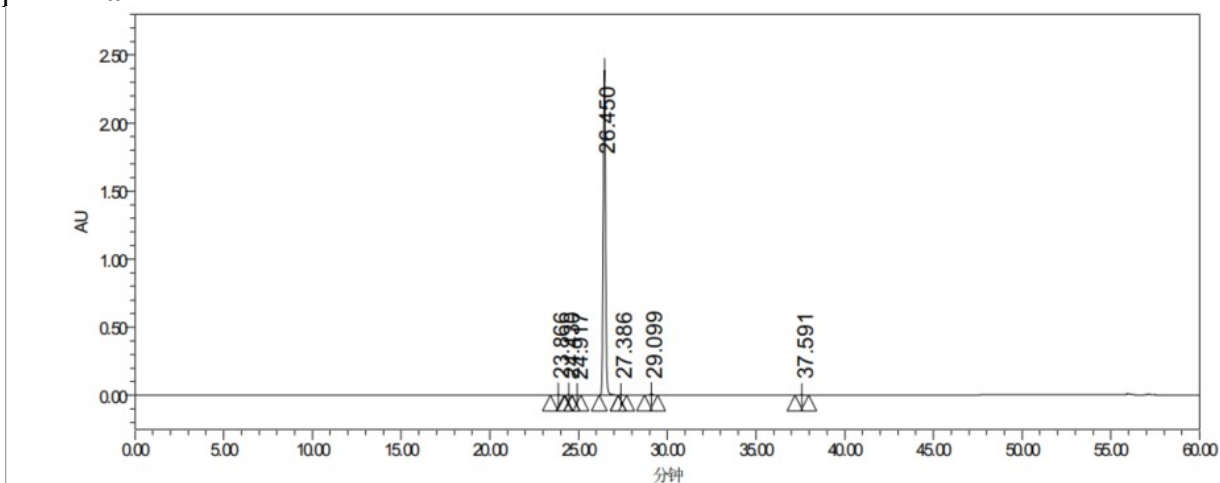

峰结果

|     | 保留时间<br>(分钟) | 面积<br>(微伏*秒) | 高度<br>(微伏) | %面积    | USP 理论塔板数 | USP 分离度 | USP 拖尾 |
|-----|--------------|--------------|------------|--------|-----------|---------|--------|
| 1   | 23.866       | 51827        | 5433       | 0.233  | 162292    |         | 1.03   |
| 2   | 24.430       | 45373        | 5431       | 0.204  | 191194    | 2.41    | 0.99   |
| 3   | 24.917       | 36145        | 2556       | 0.163  | 22738     | 1.55    | 0.80   |
| 4   | 26.450       | 21928508     | 2389379    | 98.686 | 200218    | 4.79    | 1.04   |
| 5   | 27.386       | 26098        | 2462       | 0.117  | 203513    | 3.75    | 1.69   |
| 6   | 29.099       | 106676       | 9307       | 0.476  | 202511    | 6.52    | 1.02   |
| 7   | 37.591       | 28827        | 2252       | 0.121  | 231473    | 29.15   | 1.01   |
| Sum |              | 22220453     |            |        |           |         |        |

# Compound 4b

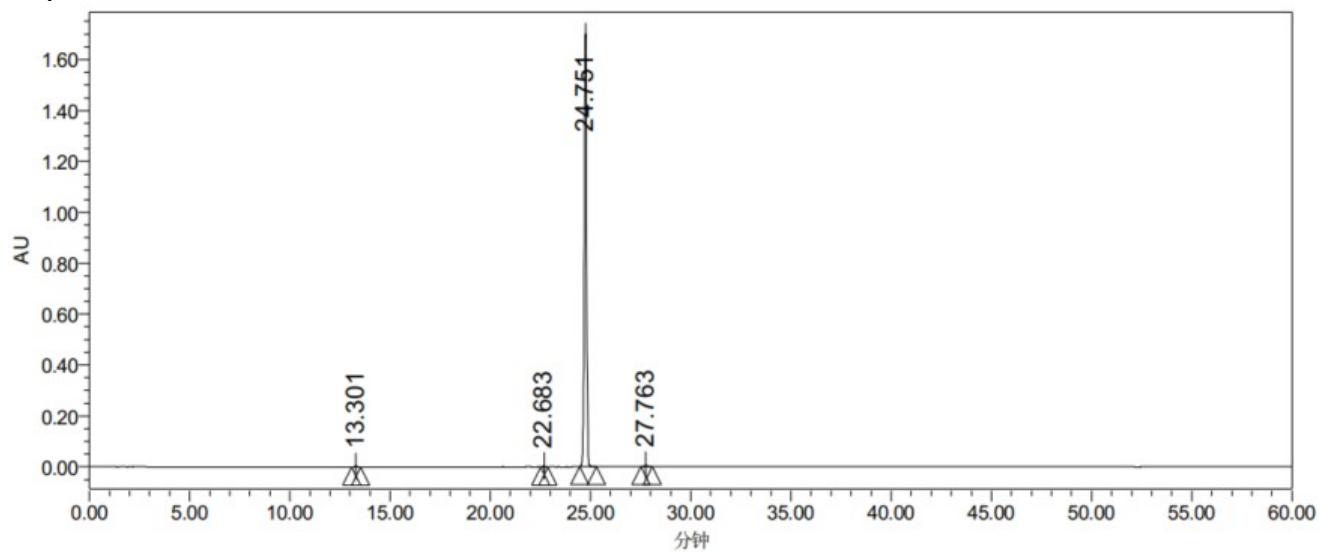

峰结果

|     | 保留时间<br>(分钟) | 面积<br>(微伏*秒) | % 面积   | 高度<br>(微伏) | USP<br>分离度 | USP<br>理论塔板数 | USP<br>拖尾 |
|-----|--------------|--------------|--------|------------|------------|--------------|-----------|
| 1   | 13.301       | 17903        | 0.132  | 2359       |            | 69787        | 0.97      |
| 2   | 22.683       | 27603        | 0.203  | 3702       | 46.10      | 206597       | 1.00      |
| 3   | 24.751       | 13504592     | 99.269 | 1701032    | 9.97       | 223118       | 0.95      |
| 4   | 27.763       | 53880        | 0.396  | 5685       | 12.82      | 198315       | 0.90      |
| Sum |              | 13603977     |        |            |            |              |           |

# Compound 4c

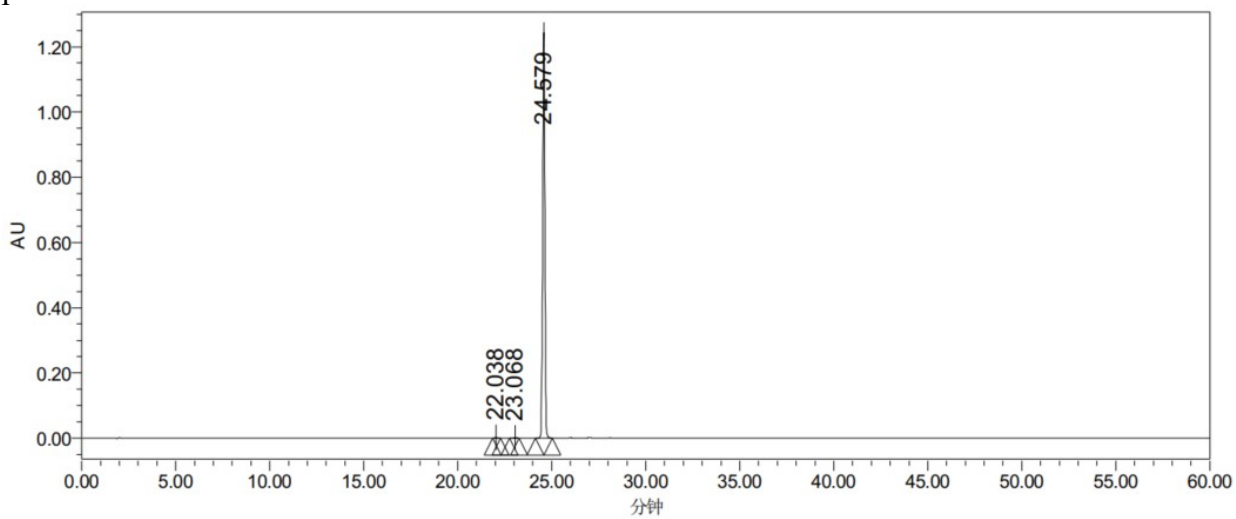

峰结果

|     | 保留时间<br>(分钟) | 面积<br>(微伏*秒) | % 面积   | 高度<br>(微伏) | USP<br>分离度 | USP<br>理论塔板数 | USP<br>拖尾 |
|-----|--------------|--------------|--------|------------|------------|--------------|-----------|
| 1   | 22.038       | 21175        | 0.215  | 2796       |            | 192217       | 1.01      |
| 2   | 23.068       | 18837        | 0.191  | 2039       | 4.65       | 154397       | 0.81      |
| 3   | 24.579       | 9799540      | 99.593 | 1246848    | 6.73       | 226316       | 0.96      |
| Sum |              | 9839552      |        |            |            |              |           |

Compound 4d

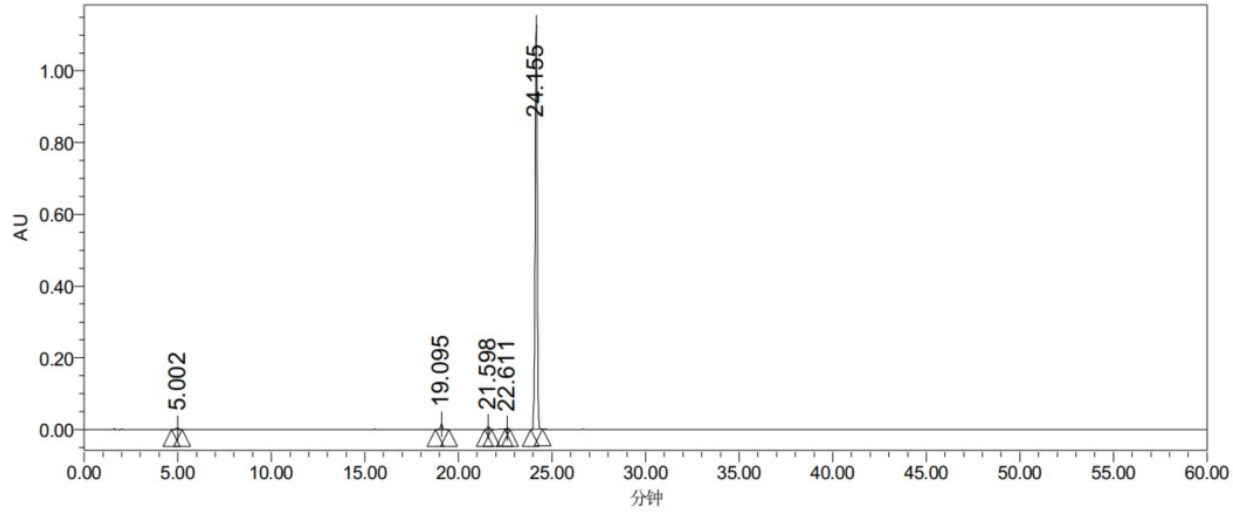

峰结果

|     | 保留时间<br>(分钟) | 面积<br>(微伏*秒) | % 面积   | 高度<br>(微伏) | USP<br>分离度 | USP<br>理论塔板数 | USP<br>拖尾 |
|-----|--------------|--------------|--------|------------|------------|--------------|-----------|
| 1   | 5.002        | 47585        | 0.530  | 4316       |            | 4106         | 0.77      |
| 2   | 19.095       | 116018       | 1.292  | 15471      | 56.57      | 153432       | 0.99      |
| 3   | 21.598       | 61704        | 0.687  | 8359       | 12.54      | 190612       | 0.95      |
| 4   | 22.611       | 21391        | 0.238  | 2878       | 4.98       | 198569       | 1.03      |
| 5   | 24.155       | 8731672      | 97.252 | 1129287    | 7.47       | 224235       | 0.96      |
| Sum |              | 8978370      |        |            |            |              |           |

Compound 4e

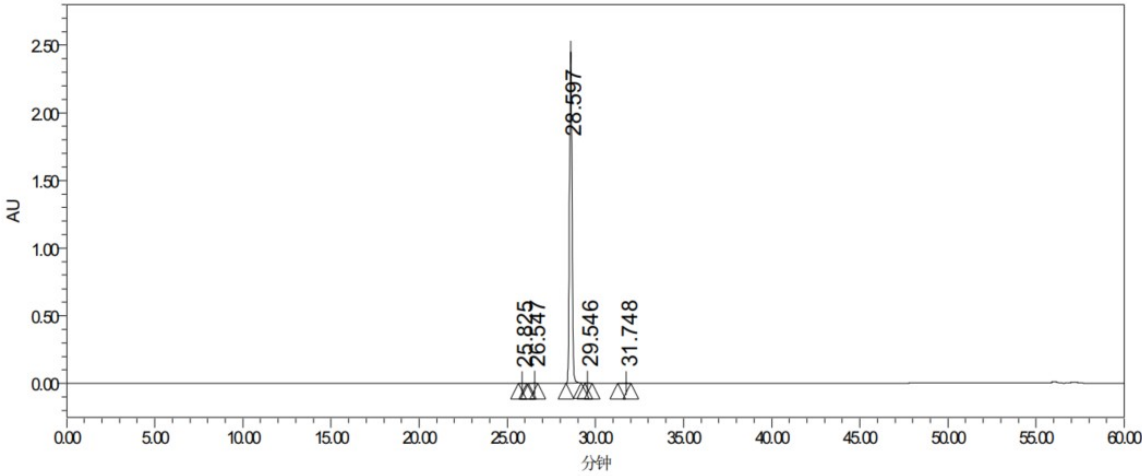

峰结果

|     | 保留时间<br>(分钟) | 面积<br>(微伏*秒) | 高度<br>(微伏) | %面积    | USP 理论塔板数 | USP 分离度 | USP 拖尾 |
|-----|--------------|--------------|------------|--------|-----------|---------|--------|
| 1   | 25.825       | 21583        | 2408       | 0.089  | 190271    |         | 1.08   |
| 2   | 26.547       | 53178        | 5538       | 0.220  | 178655    | 2.91    | 0.80   |
| 3   | 28.597       | 23986096     | 2450581    | 99.383 | 208560    | 8.04    | 1.03   |
| 4   | 29.546       | 33552        | 2799       | 0.139  | 113714    | 3.22    | 1.61   |
| 5   | 31.748       | 40546        | 3399       | 0.168  | 191205    | 6.95    | 0.75   |
| Sum |              | 24135056     |            |        |           |         |        |



Compound 4f

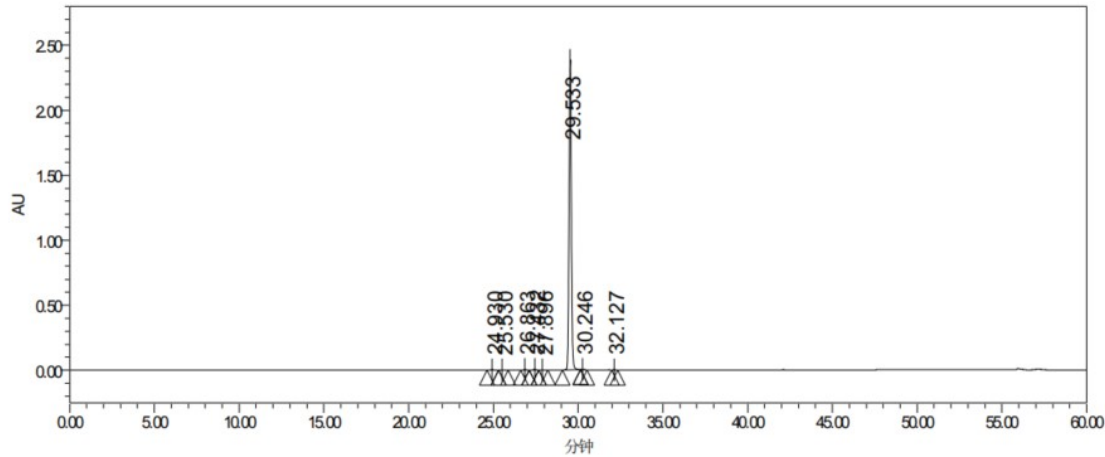

| 峰结果 |              |              |            |        |           |         |        |
|-----|--------------|--------------|------------|--------|-----------|---------|--------|
|     | 保留时间<br>(分钟) | 面积<br>(微伏*秒) | 高度<br>(微伏) | %面积    | USP 理论塔板数 | USP 分离度 | USP 拖尾 |
| 1   | 24.930       | 54212        | 4124       | 0.231  | 83835     |         | 1.11   |
| 2   | 25.530       | 27278        | 2553       | 0.116  | 177884    | 2.02    | 0.98   |
| 3   | 26.863       | 54873        | 5487       | 0.234  | 163818    | 5.15    | 0.97   |
| 4   | 27.432       | 68327        | 6914       | 0.291  | 187609    | 2.14    | 1.05   |
| 5   | 27.896       | 33105        | 2212       | 0.141  | 66870     | 1.35    | 1.15   |
| 6   | 29.533       | 23175706     | 2385623    | 98.788 | 222593    | 4.80    | 1.04   |
| 7   | 30.246       | 22665        | 2024       | 0.097  | 134799    | 2.04    | 1.83   |
| 8   | 32.127       | 23984        | 2610       | 0.102  | 262430    | 5.39    | 1.05   |
| Sum |              | 23460150     |            |        |           |         |        |

Compound 4g

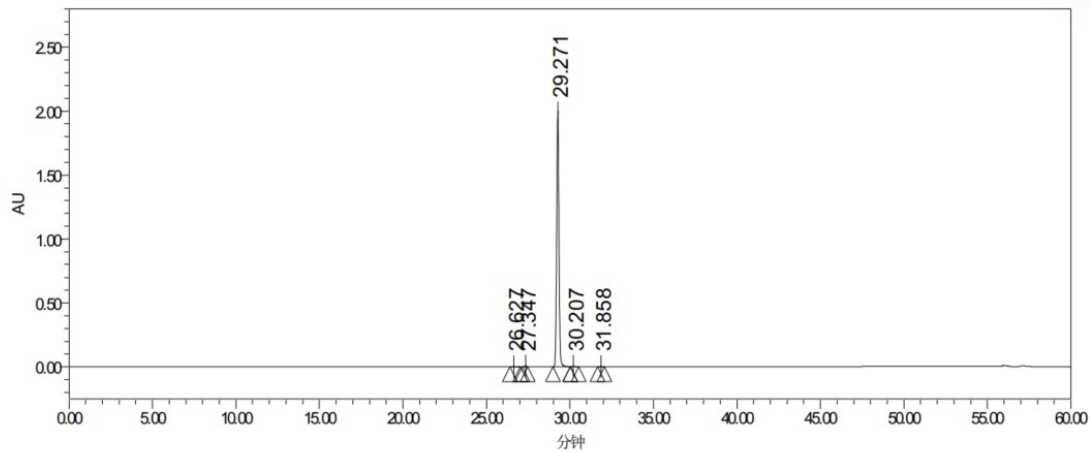

| 峰结果 |              |              |            |        |           |         |        |
|-----|--------------|--------------|------------|--------|-----------|---------|--------|
|     | 保留时间<br>(分钟) | 面积<br>(微伏*秒) | 高度<br>(微伏) | %面积    | USP 理论塔板数 | USP 分离度 | USP 拖尾 |
| 1   | 26.627       | 35803        | 3552       | 0.185  | 181142    |         | 1.40   |
| 2   | 27.347       | 47851        | 5867       | 0.247  | 244072    | 3.01    | 0.88   |
| 3   | 29.271       | 19209049     | 2005259    | 99.249 | 222377    | 8.11    | 1.04   |
| 4   | 30.207       | 36887        | 3556       | 0.191  | 186100    | 3.50    | 1.34   |
| 5   | 31.858       | 24865        | 2389       | 0.129  | 201343    | 5.80    | 0.96   |
| Sum |              | 19354476     |            |        |           |         |        |

Compound 4h

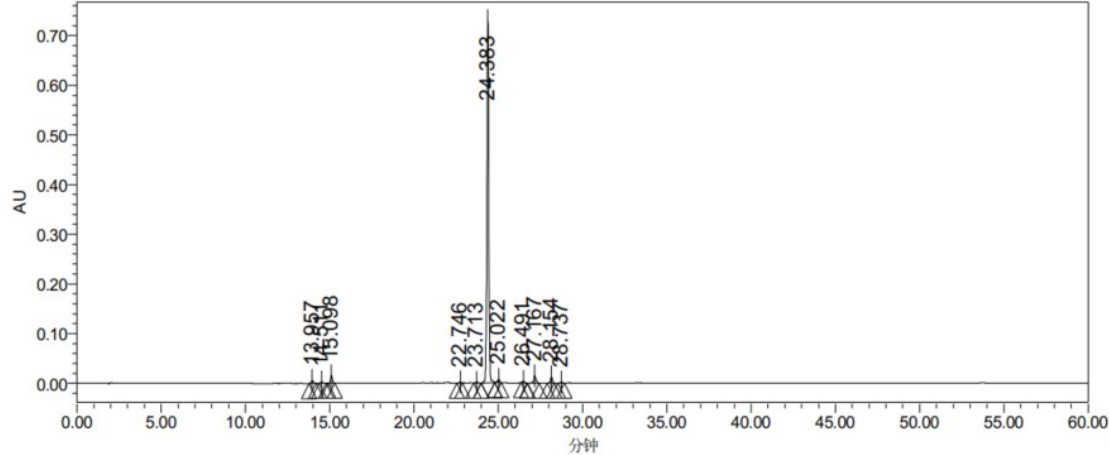

峰结果

|     | 保留时间<br>(分钟) | 面积<br>(微伏*秒) | % 面积   | 高度<br>(微伏) | USP<br>分离度 | USP<br>理论塔板数 | USP<br>拖尾 |
|-----|--------------|--------------|--------|------------|------------|--------------|-----------|
| 1   | 13.957       | 45610        | 0.717  | 5853       |            | 74242        | 1.08      |
| 2   | 14.511       | 22326        | 0.351  | 3044       | 2.73       | 90028        | 1.19      |
| 3   | 15.098       | 119316       | 1.875  | 15521      | 2.90       | 86958        | 1.06      |
| 4   | 22.746       | 16685        | 0.262  | 2248       | 37.26      | 209423       | 0.83      |
| 5   | 23.713       | 18459        | 0.290  | 1840       | 4.18       | 138088       | 1.29      |
| 6   | 24.383       | 5803875      | 91.196 | 729655     | 2.85       | 220190       | 0.97      |
| 7   | 25.022       | 55849        | 0.878  | 7044       | 3.04       | 236507       | 0.90      |
| 8   | 26.491       | 26669        | 0.419  | 3280       | 6.82       | 239043       | 1.28      |
| 9   | 27.167       | 134371       | 2.111  | 14104      | 2.90       | 210960       | 0.96      |
| 10  | 28.154       | 101063       | 1.588  | 12487      | 4.26       | 273069       | 0.95      |
| 11  | 28.737       | 19985        | 0.314  | 2435       | 2.64       | 275259       | 0.93      |
| Sum |              | 6364208      |        |            |            |              |           |

Compound 4i

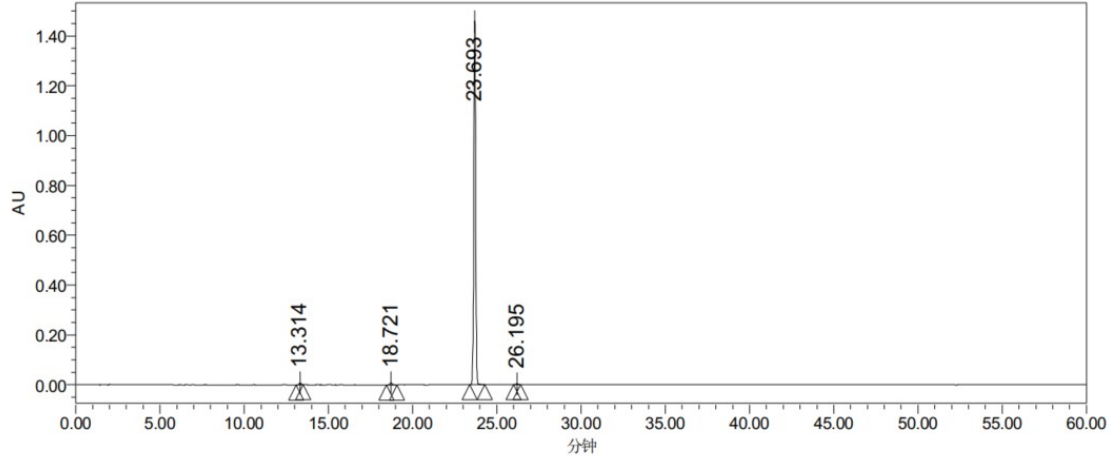

峰结果

|     | 保留时间<br>(分钟) | 面积<br>(微伏*秒) | % 面积   | 高度<br>(微伏) | USP<br>分离度 | USP<br>理论塔板数 | USP<br>拖尾 |
|-----|--------------|--------------|--------|------------|------------|--------------|-----------|
| 1   | 13.314       | 59209        | 0.517  | 7808       |            | 69841        | 0.96      |
| 2   | 18.721       | 61914        | 0.540  | 8353       | 26.88      | 148422       | 0.98      |
| 3   | 23.693       | 11303520     | 98.673 | 1460390    | 24.55      | 214882       | 0.96      |
| 4   | 26.195       | 30920        | 0.270  | 3445       | 10.97      | 189126       | 1.10      |
| Sum |              | 11455563     |        |            |            |              |           |

Compound 4j

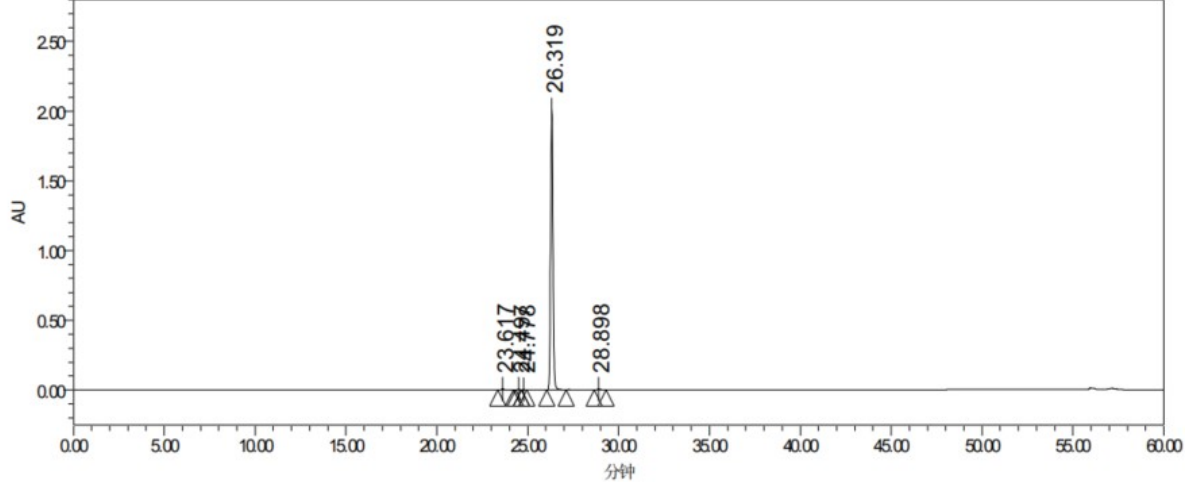

| 峰结果 |              |              |            |        |           |         |        |
|-----|--------------|--------------|------------|--------|-----------|---------|--------|
|     | 保留时间<br>(分钟) | 面积<br>(微伏*秒) | 高度<br>(微伏) | %面积    | USP 理论塔板数 | USP 分离度 | USP 拖尾 |
| 1   | 23.617       | 94467        | 8810       | 0.514  | 151941    |         | 1.47   |
| 2   | 24.497       | 49171        | 5586       | 0.268  | 164325    | 3.52    | 0.99   |
| 3   | 24.778       | 20557        | 2576       | 0.112  | 207605    | 1.22    | 1.20   |
| 4   | 26.319       | 1812708      | 2019847    | 98.686 | 204660    | 6.79    | 1.04   |
| 5   | 28.898       | 75362        | 5868       | 0.410  | 111187    | 8.78    | 1.33   |
| Sum |              | 18366655     |            |        |           |         |        |

Compound 4k

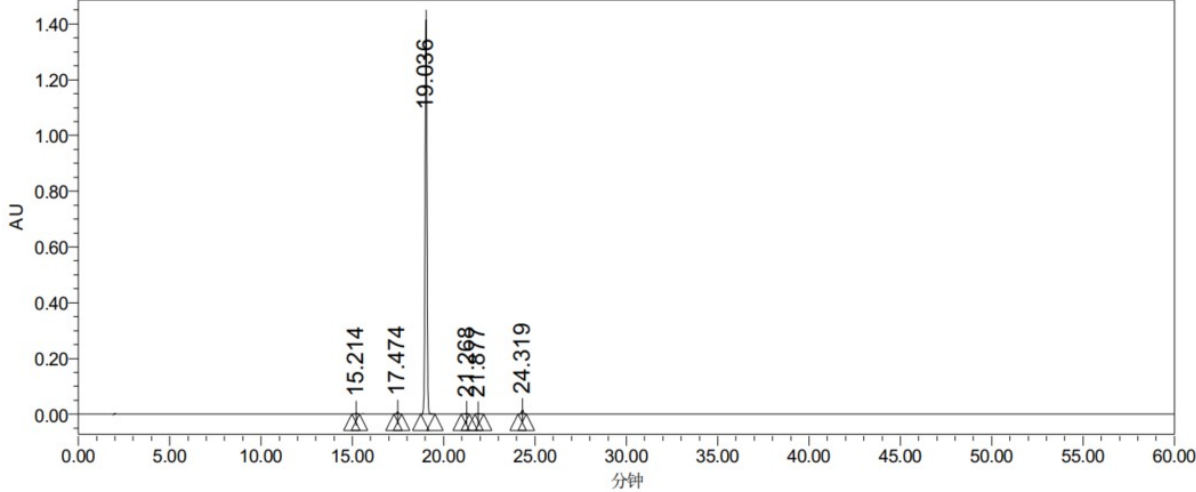

| 峰结果 |              |              |        |            |            |              |           |
|-----|--------------|--------------|--------|------------|------------|--------------|-----------|
|     | 保留时间<br>(分钟) | 面积<br>(微伏*秒) | % 面积   | 高度<br>(微伏) | USP<br>分离度 | USP<br>理论塔板数 | USP<br>拖尾 |
| 1   | 15.214       | 26216        | 0.258  | 3831       |            | 113694       | 0.96      |
| 2   | 17.474       | 50797        | 0.501  | 7449       | 12.45      | 155630       | 0.96      |
| 3   | 19.036       | 9913608      | 97.744 | 1417150    | 8.50       | 169839       | 0.97      |
| 4   | 21.268       | 22262        | 0.219  | 3018       | 11.58      | 190765       | 0.89      |
| 5   | 21.877       | 20182        | 0.199  | 2675       | 3.06       | 196521       | 1.07      |
| 6   | 24.319       | 109325       | 1.078  | 14115      | 11.91      | 223638       | 0.98      |
| Sum |              | 10142390     |        |            |            |              |           |

Compound 4l

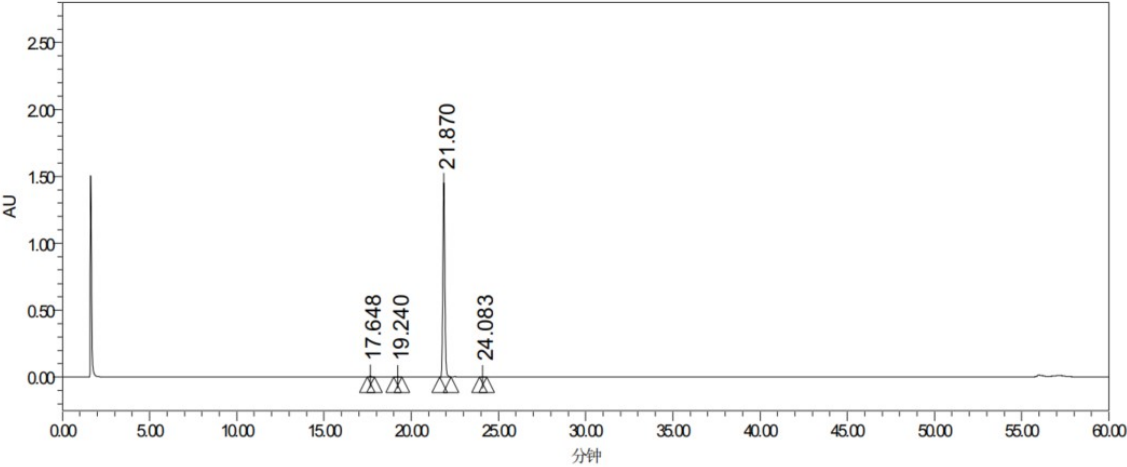

| 峰结果 |              |              |            |        |           |         |        |
|-----|--------------|--------------|------------|--------|-----------|---------|--------|
|     | 保留时间<br>(分钟) | 面积<br>(微伏*秒) | 高度<br>(微伏) | %面积    | USP 理论塔板数 | USP 分离度 | USP 拖尾 |
| 1   | 17.648       | 61608        | 8045       | 0.527  | 119722    |         | 1.11   |
| 2   | 19.240       | 34459        | 4208       | 0.295  | 130576    | 7.50    | 0.98   |
| 3   | 21.870       | 11553269     | 1454618    | 98.918 | 177192    | 12.25   | 1.06   |
| 4   | 24.083       | 30309        | 3476       | 0.260  | 180432    | 9.96    | 1.26   |
| Sum |              | 11679644     |            |        |           |         |        |

Compound 4m

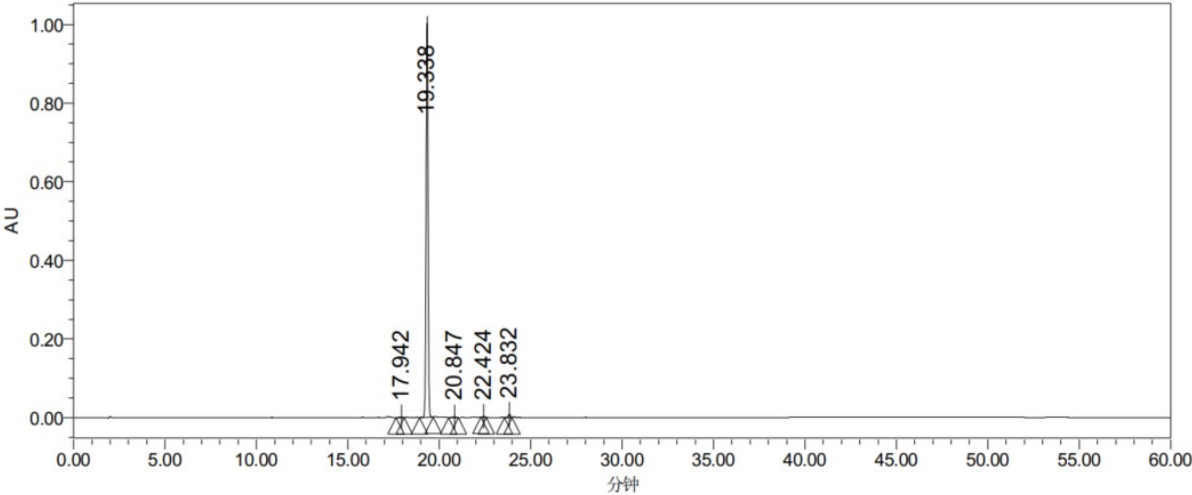

| 峰结果 |              |              |        |            |            |              |           |
|-----|--------------|--------------|--------|------------|------------|--------------|-----------|
|     | 保留时间<br>(分钟) | 面积<br>(微伏*秒) | % 面积   | 高度<br>(微伏) | USP<br>分离度 | USP<br>理论塔板数 | USP<br>拖尾 |
| 1   | 17.942       | 15673        | 0.210  | 1504       |            | 79842        | 0.74      |
| 2   | 19.338       | 7330111      | 98.451 | 1004833    | 5.99       | 161074       | 0.97      |
| 3   | 20.847       | 17033        | 0.229  | 1516       | 6.00       | 71242        | 0.86      |
| 4   | 22.424       | 20705        | 0.278  | 2834       | 6.22       | 203261       | 1.02      |
| 5   | 23.832       | 61940        | 0.832  | 8063       | 6.99       | 229274       | 0.83      |
| Sum |              | 7445462      |        |            |            |              |           |

Compound 4n

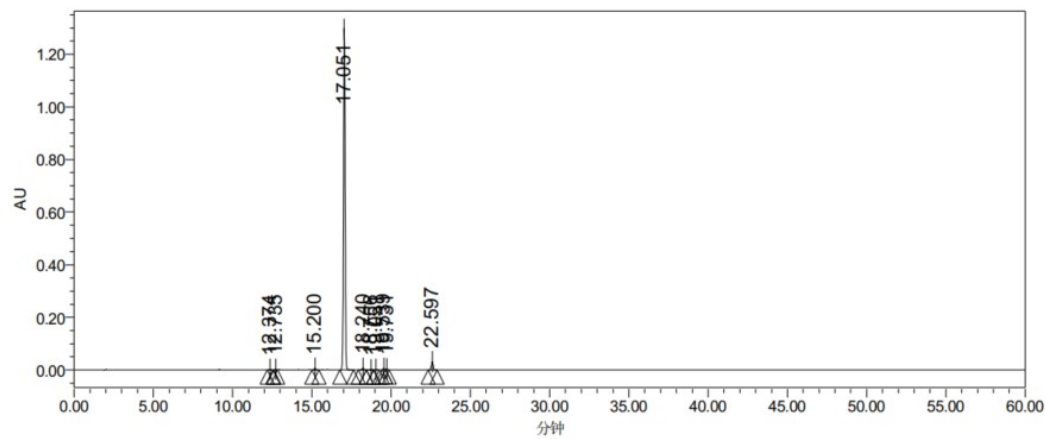

峰结果

|     | 保留时间<br>(分钟) | 面积<br>(微伏*秒) | % 面积   | 高度<br>(微伏) | USP<br>分离度 | USP<br>理论塔板数 | USP<br>拖尾 |
|-----|--------------|--------------|--------|------------|------------|--------------|-----------|
| 1   | 12.374       | 18767        | 0.196  | 2459       |            | 58565        | 0.96      |
| 2   | 12.735       | 17364        | 0.181  | 3014       | 1.98       | 105289       | 0.91      |
| 3   | 15.200       | 43101        | 0.450  | 5845       | 14.01      | 101764       | 1.13      |
| 4   | 17.051       | 9109218      | 95.122 | 1298707    | 9.69       | 136541       | 0.96      |
| 5   | 18.240       | 51525        | 0.538  | 6978       | 6.18       | 141632       | 0.97      |
| 6   | 18.756       | 17879        | 0.187  | 1914       | 2.17       | 74631        | 0.80      |
| 7   | 19.051       | 15932        | 0.166  | 2157       | 1.25       | 158652       | 1.13      |
| 8   | 19.539       | 34050        | 0.356  | 5488       | 2.68       | 210643       | 0.92      |
| 9   | 19.731       | 22242        | 0.232  | 3660       | 1.14       | 226077       | 1.24      |
| 10  | 22.597       | 246321       | 2.572  | 31446      | 15.21      | 190867       | 0.98      |
| Sum |              | 9576399      |        |            |            |              |           |

Compound 4o

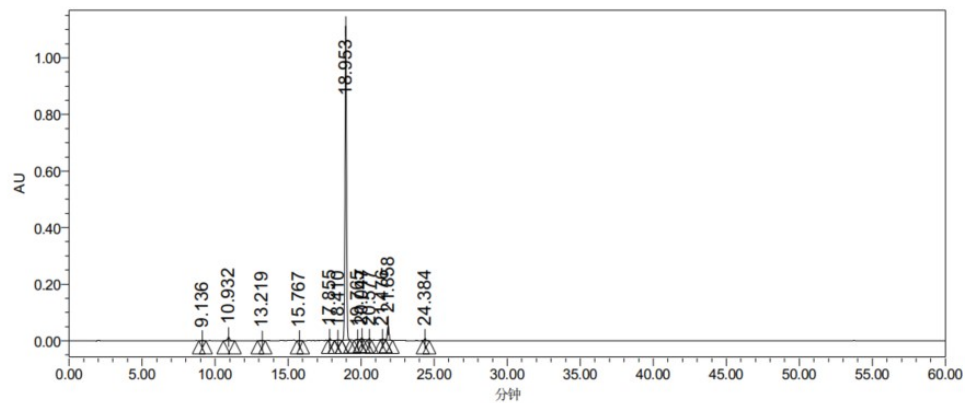

峰结果

|     | 保留时间<br>(分钟) | 面积<br>(微伏*秒) | % 面积   | 高度<br>(微伏) | USP<br>分离度 | USP<br>理论塔板数 | USP<br>拖尾 |
|-----|--------------|--------------|--------|------------|------------|--------------|-----------|
| 1   | 9.136        | 15804        | 0.176  | 1809       |            | 27052        | 0.94      |
| 2   | 10.932       | 134407       | 1.497  | 13324      | 7.25       | 30623        | 0.82      |
| 3   | 13.219       | 16213        | 0.181  | 1564       | 8.01       | 36628        | 0.74      |
| 4   | 15.767       | 15562        | 0.173  | 1810       | 10.01      | 99409        | 1.47      |
| 5   | 17.855       | 55727        | 0.621  | 6151       | 9.71       | 107323       | 1.63      |
| 6   | 18.410       | 25861        | 0.288  | 2199       | 2.11       | 63453        | 1.16      |
| 7   | 18.953       | 8105869      | 90.295 | 1113271    | 2.20       | 155787       | 0.98      |
| 8   | 19.765       | 22618        | 0.252  | 1952       | 3.18       | 61745        | 0.81      |
| 9   | 20.047       | 42685        | 0.475  | 6519       | 1.14       | 203265       | 1.02      |
| 10  | 20.577       | 41154        | 0.458  | 5676       | 2.84       | 182827       | 0.99      |
| 11  | 21.476       | 45626        | 0.508  | 4073       | 3.63       | 75758        | 1.23      |
| 12  | 21.858       | 401356       | 4.471  | 50847      | 1.49       | 175126       | 1.03      |
| 13  | 24.384       | 54190        | 0.604  | 6770       | 12.03      | 225799       | 1.39      |
| Sum |              | 8977072      |        |            |            |              |           |

# Compound 4p

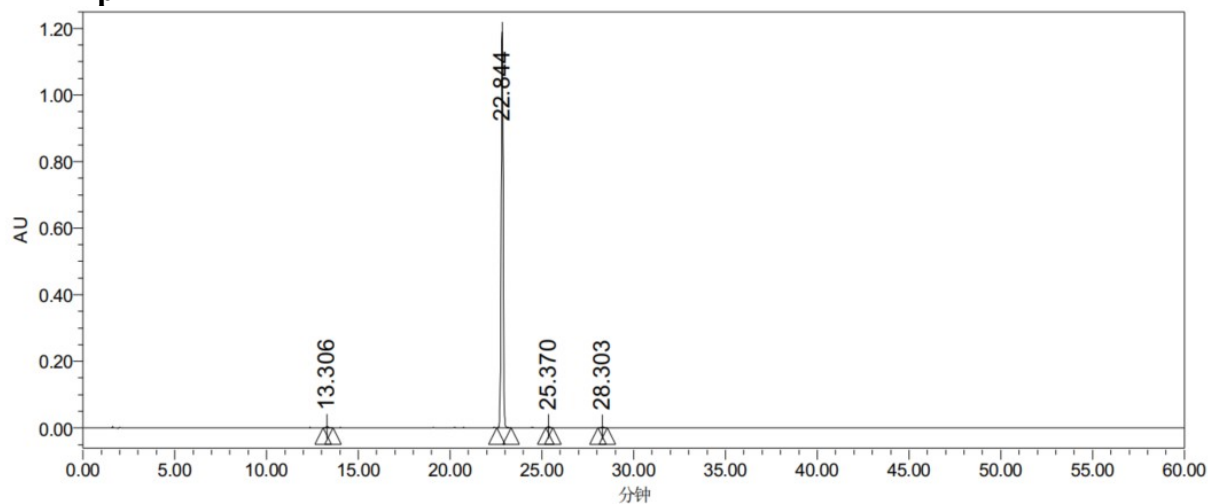

峰结果

|     | 保留时间<br>(分钟) | 面积<br>(微伏*秒) | % 面积   | 高度<br>(微伏) | USP<br>分离度 | USP<br>理论塔板数 | USP<br>拖尾 |
|-----|--------------|--------------|--------|------------|------------|--------------|-----------|
| 1   | 13.306       | 34500        | 0.376  | 4483       |            | 69378        | 0.97      |
| 2   | 22.844       | 9081165      | 99.040 | 1191019    | 46.53      | 206141       | 0.96      |
| 3   | 25.370       | 30304        | 0.330  | 3871       | 12.09      | 232786       | 1.02      |
| 4   | 28.303       | 23242        | 0.253  | 2768       | 13.37      | 261187       | 0.99      |
| Sum |              | 9169211      |        |            |            |              |           |

# Compound 4q

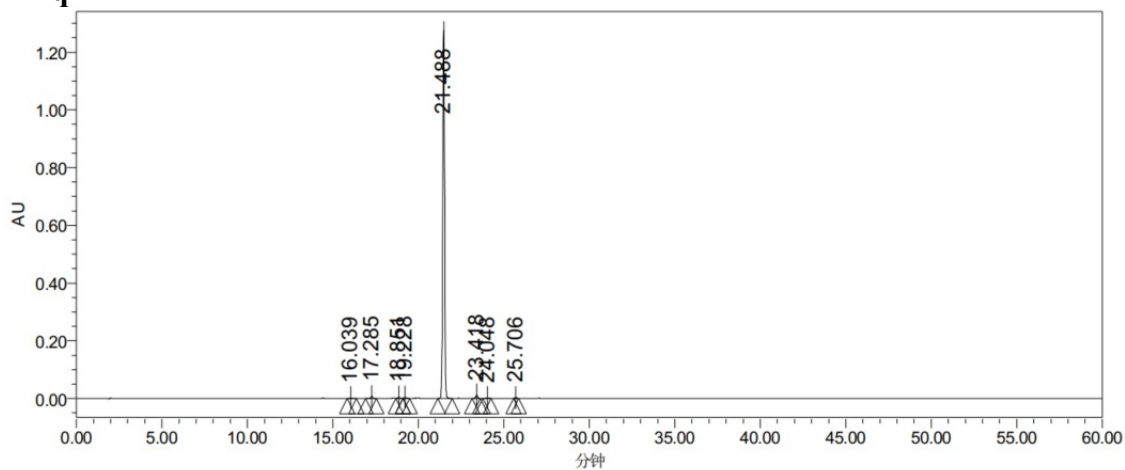

峰结果

|     | 保留时间<br>(分钟) | 面积<br>(微伏*秒) | % 面积   | 高度<br>(微伏) | USP<br>分离度 | USP<br>理论塔板数 | USP<br>拖尾 |
|-----|--------------|--------------|--------|------------|------------|--------------|-----------|
| 1   | 16.039       | 18026        | 0.184  | 2270       |            | 110884       | 1.32      |
| 2   | 17.285       | 57423        | 0.586  | 6840       | 6.03       | 110095       | 0.89      |
| 3   | 18.851       | 35982        | 0.367  | 4199       | 7.17       | 121636       | 1.31      |
| 4   | 19.228       | 30282        | 0.309  | 3632       | 1.70       | 137866       | 1.42      |
| 5   | 21.488       | 9532728      | 97.222 | 1280028    | 10.80      | 191359       | 0.97      |
| 6   | 23.418       | 87413        | 0.892  | 10674      | 9.23       | 191994       | 0.91      |
| 7   | 24.048       | 22205        | 0.226  | 1926       | 2.49       | 112678       | 0.88      |
| 8   | 25.706       | 21064        | 0.215  | 2902       | 6.81       | 272976       | 1.08      |
| Sum |              | 9805123      |        |            |            |              |           |

Compound 4r

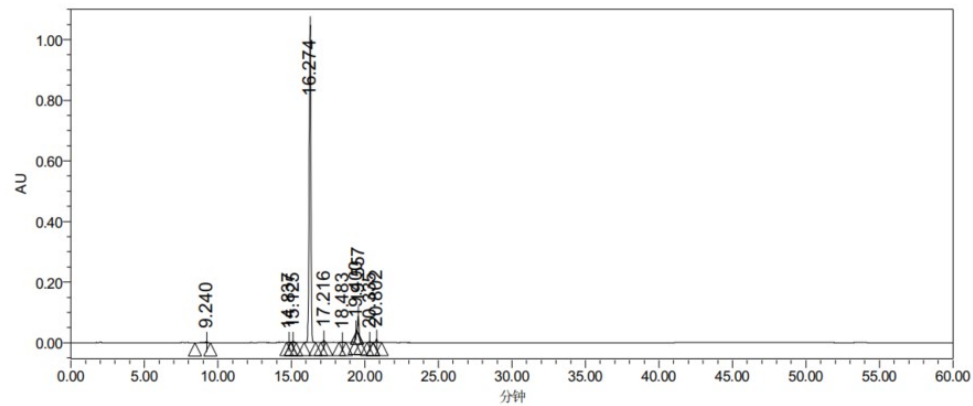

峰结果

|     | 保留时间<br>(分钟) | 面积<br>(微伏*秒) | % 面积   | 高度<br>(微伏) | USP<br>分离度 | USP<br>理论塔板数 | USP<br>拖尾 |
|-----|--------------|--------------|--------|------------|------------|--------------|-----------|
| 1   | 9.240        | 55006        | 0.593  | 3623       |            | 18357        | 0.66      |
| 2   | 14.837       | 15870        | 0.171  | 1848       | 20.64      | 64220        | 0.83      |
| 3   | 15.125       | 29943        | 0.323  | 2725       | 1.09       | 40601        | 1.06      |
| 4   | 16.274       | 8533368      | 92.063 | 1046997    | 4.46       | 90402        | 0.90      |
| 5   | 17.216       | 54336        | 0.586  | 6952       | 4.35       | 107191       | 0.87      |
| 6   | 18.483       | 19452        | 0.210  | 1339       | 4.00       | 15780        | 1.03      |
| 7   | 19.400       | 76431        | 0.825  | 16292      | 3.33       | 363625       | 0.85      |
| 8   | 19.557       | 383783       | 4.140  | 64233      | 1.07       | 231594       | 1.19      |
| 9   | 20.335       | 24424        | 0.264  | 3033       | 4.13       | 150895       | 0.98      |
| 10  | 20.802       | 76417        | 0.824  | 10223      | 2.25       | 177392       | 0.98      |
| Sum |              | 9269032      |        |            |            |              |           |

Compound 4s

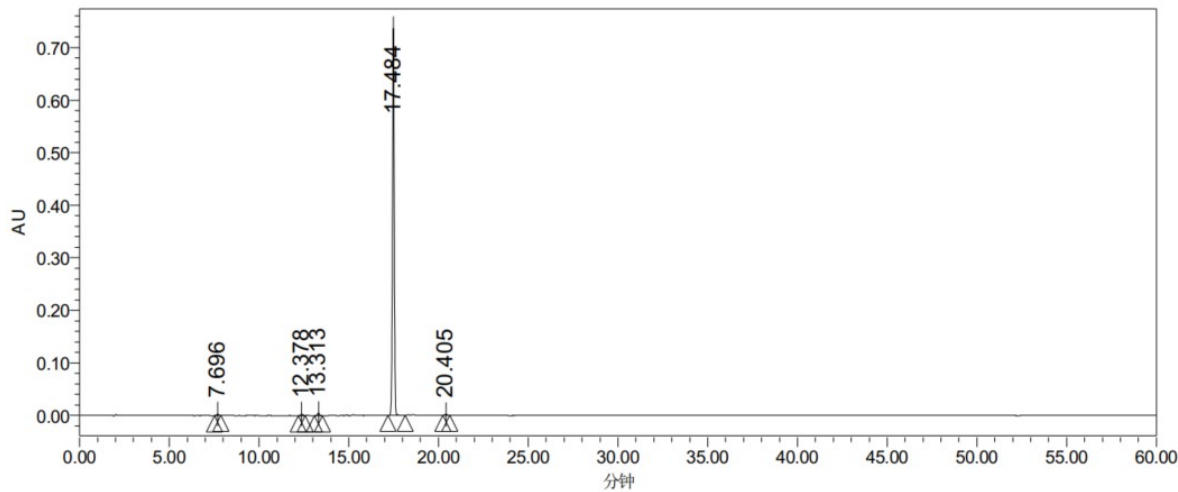

峰结果

|     | 保留时间<br>(分钟) | 面积<br>(微伏*秒) | % 面积   | 高度<br>(微伏) | USP<br>分离度 | USP<br>理论塔板数 | USP<br>拖尾 |
|-----|--------------|--------------|--------|------------|------------|--------------|-----------|
| 1   | 7.696        | 20089        | 0.385  | 2789       |            | 25440        | 0.96      |
| 2   | 12.378       | 20191        | 0.387  | 2683       | 23.50      | 61188        | 0.98      |
| 3   | 13.313       | 34432        | 0.659  | 4558       | 4.60       | 71006        | 0.98      |
| 4   | 17.484       | 5126951      | 98.177 | 736694     | 21.42      | 145880       | 0.97      |
| 5   | 20.405       | 20470        | 0.392  | 2061       | 12.39      | 76735        | 1.15      |
| Sum |              | 5222134      |        |            |            |              |           |



Compound 4t

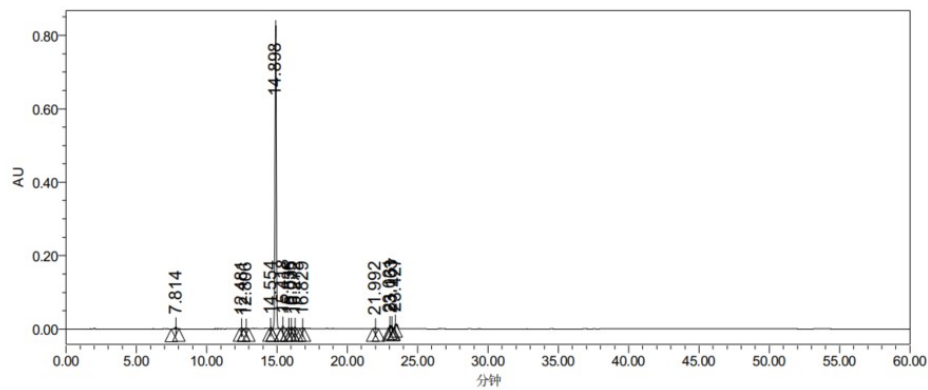

峰结果

|     | 保留时间<br>(分钟) | 面积<br>(微伏*秒) | % 面积   | 高度<br>(微伏) | USP<br>分离度 | USP<br>理论塔板数 | USP<br>拖尾 |
|-----|--------------|--------------|--------|------------|------------|--------------|-----------|
| 1   | 7.814        | 45820        | 0.819  | 5276       |            | 21379        | 0.74      |
| 2   | 12.481       | 19750        | 0.353  | 2900       | 22.73      | 73936        | 0.97      |
| 3   | 12.806       | 15999        | 0.286  | 1643       | 1.26       | 24375        | 1.07      |
| 4   | 14.554       | 25579        | 0.457  | 4272       | 7.07       | 127190       | 0.93      |
| 5   | 14.898       | 5244070      | 93.743 | 826062     | 2.06       | 126633       | 0.98      |
| 6   | 15.418       | 55805        | 0.998  | 7235       | 2.84       | 102829       | 1.37      |
| 7   | 15.836       | 21324        | 0.381  | 3296       | 2.23       | 128695       | 0.89      |
| 8   | 16.035       | 17766        | 0.318  | 3086       | 1.18       | 163589       | 1.07      |
| 9   | 16.272       | 26326        | 0.471  | 3620       | 1.33       | 106354       | 1.03      |
| 10  | 16.829       | 20456        | 0.366  | 2832       | 2.95       | 149219       | 0.76      |
| 11  | 21.992       | 23099        | 0.413  | 3096       | 27.41      | 204960       | 1.05      |
| 12  | 23.031       | 22219        | 0.397  | 4262       | 6.18       | 440262       | 0.76      |
| 13  | 23.163       | 27449        | 0.491  | 4919       | 0.91       | 382027       | 1.35      |
| 14  | 23.427       | 28451        | 0.509  | 5510       | 1.87       | 490999       | 0.75      |
| Sum |              | 5594113      |        |            |            |              |           |
